# Supplementary material for: Preparation of glycosyl carboxylic acidsviastereoselective synthesis and oxidative cleavage ofC-vinyl glycosides
Source: Royal Society of Chemistry journal article supplement (doi:10.1039/d2ob00896c), 2022-01-01

## Supporting Information

### Preparation of Glycosyl Carboxylic Acids via Stereoselective Synthesis and Oxidative Cleavage of C-Vinyl Glycosides: An Improved Cyanide-Free Strategy

Qiang Pan<sup>a‡</sup>, Qi-Min Zhou<sup>a</sup>, Pei-Xin Rui<sup>a\*</sup> and Xiang-Guo Hu<sup>ab\*</sup>

<sup>a</sup>National Engineering Research Center for Carbohydrate Synthesis, Jiangxi Normal University, Nanchang 330022 ( P. R. China); <sup>b</sup>Key Lab of Fluorine and Silicon for Energy Materials and Chemistry of Ministry of Education. E-mail: [pxrui@jxnu.edu.cn](mailto:pxrui@jxnu.edu.cn); [xiangguo.hu@jxnu.edu.cn](mailto:xiangguo.hu@jxnu.edu.cn)

## Contents

|                                                     |        |
|-----------------------------------------------------|--------|
| Copies of NMR Spectra .....                         | - 2 -  |
| The determination of the diastereomeric ratio ..... | - 52 - |

# Copies of NMR Spectra

## <sup>1</sup>H NMR (400 MHz, CDCl<sub>3</sub>) of 4d

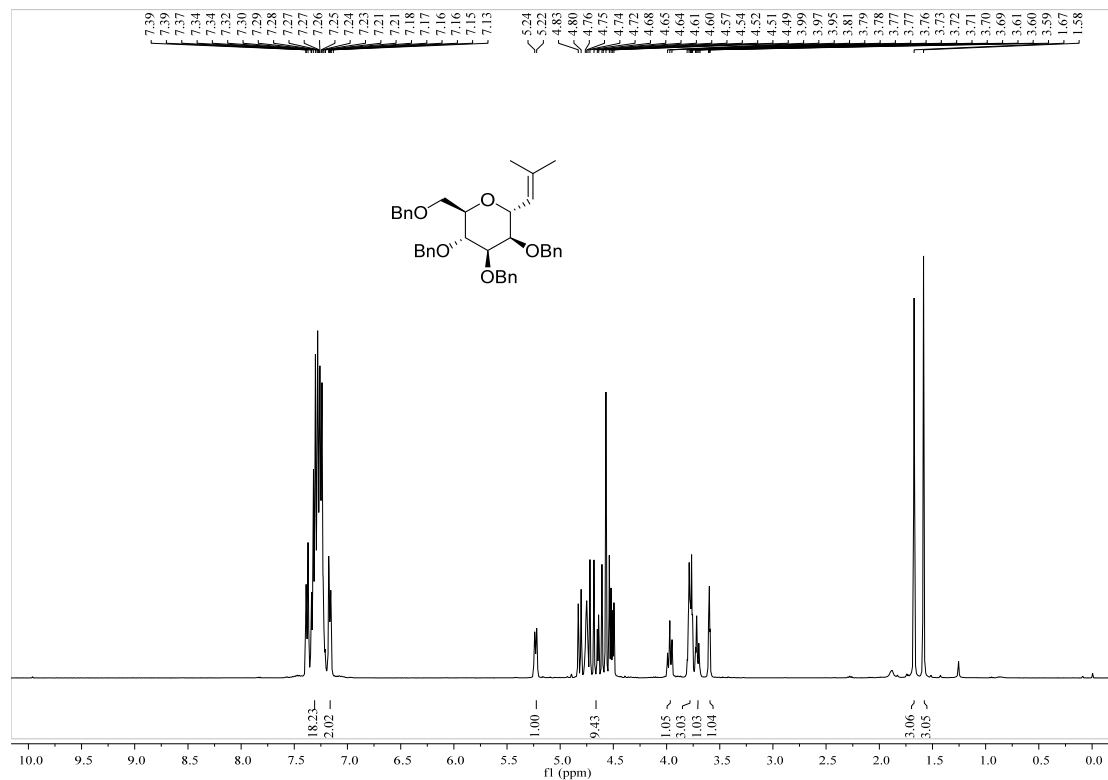

## <sup>13</sup>C NMR (100 MHz, CDCl<sub>3</sub>) of 4d

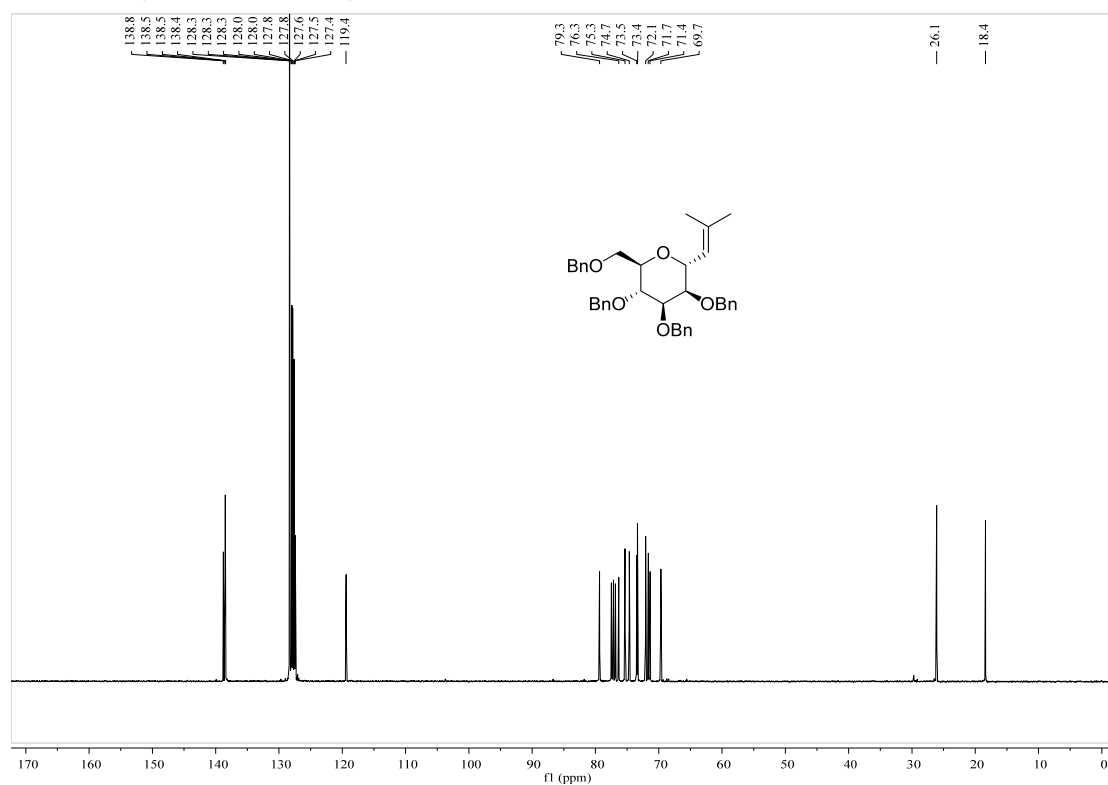

<sup>1</sup>H NMR (400 MHz, CDCl<sub>3</sub>) of 4e

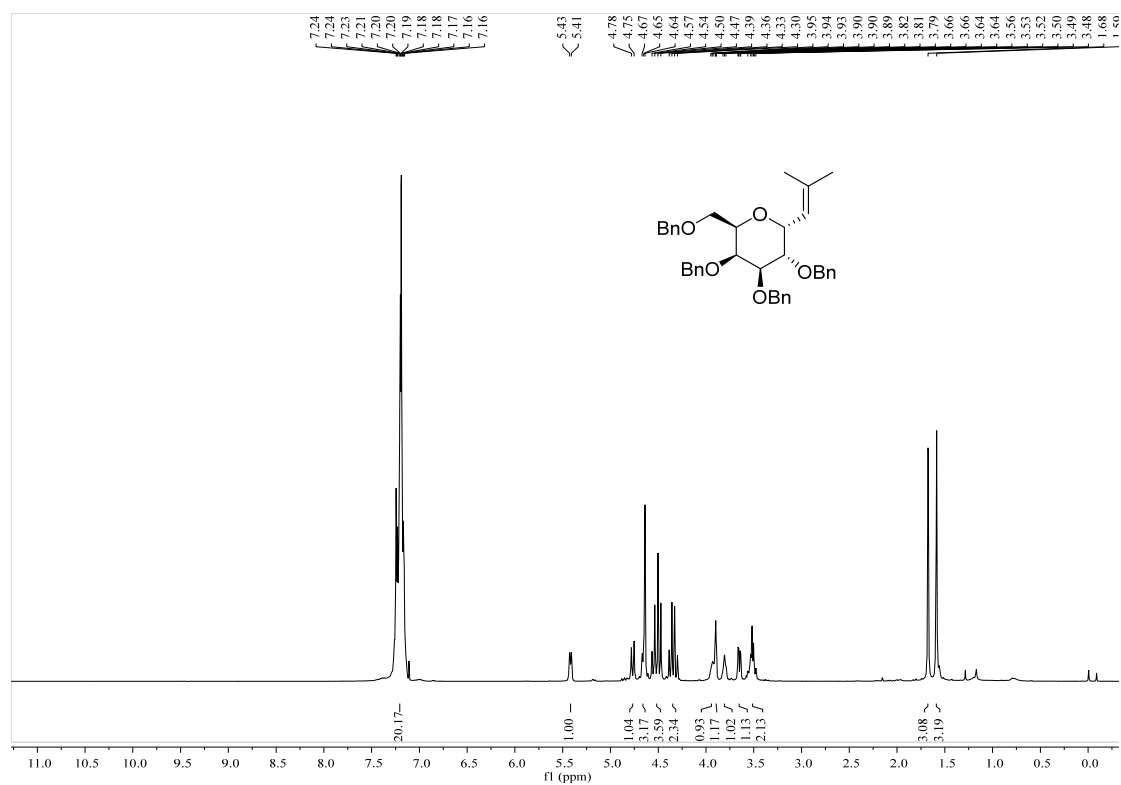

<sup>13</sup>C NMR (100 MHz, CDCl<sub>3</sub>) of 4e

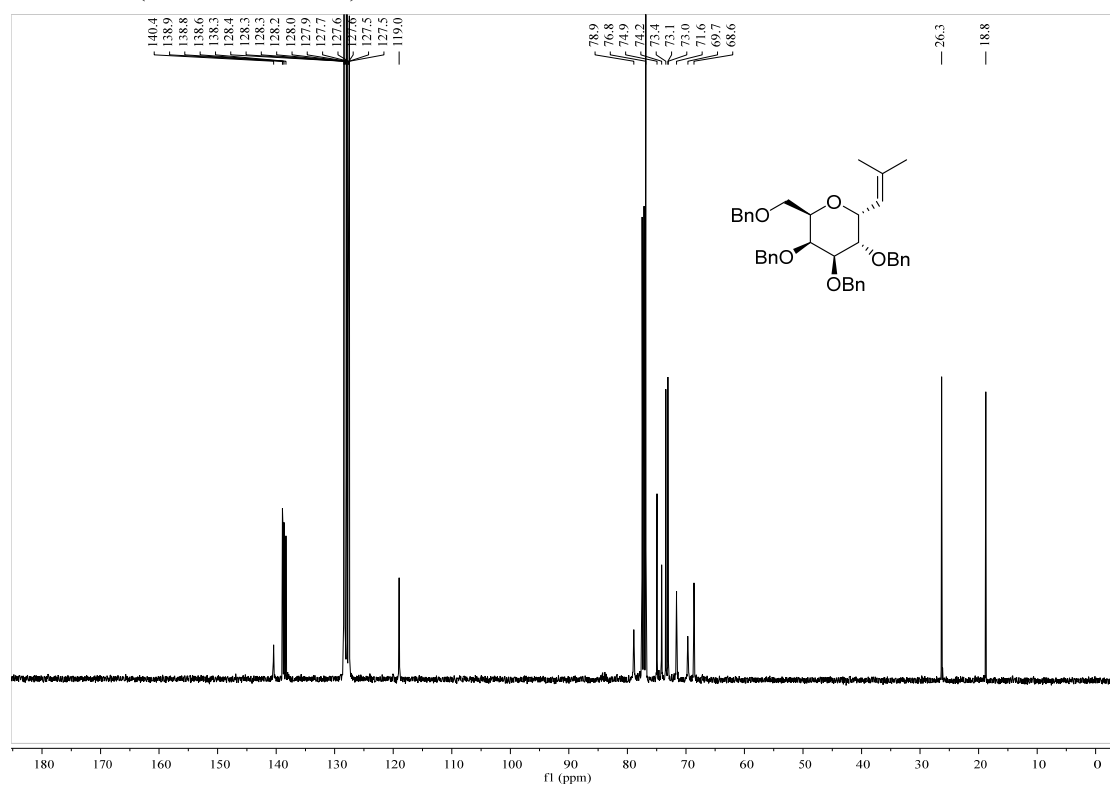

<sup>1</sup>H NMR (400 MHz, CDCl<sub>3</sub>) of **4f**

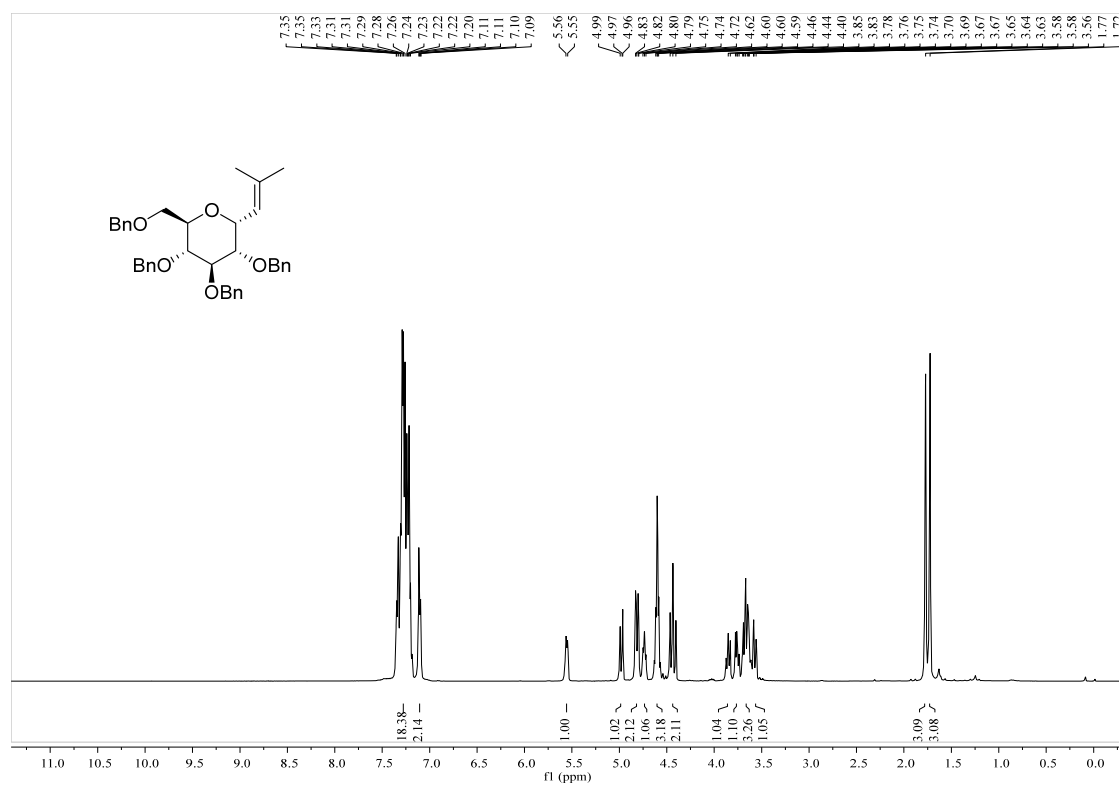

<sup>13</sup>C NMR (100 MHz, CDCl<sub>3</sub>) of **4f**

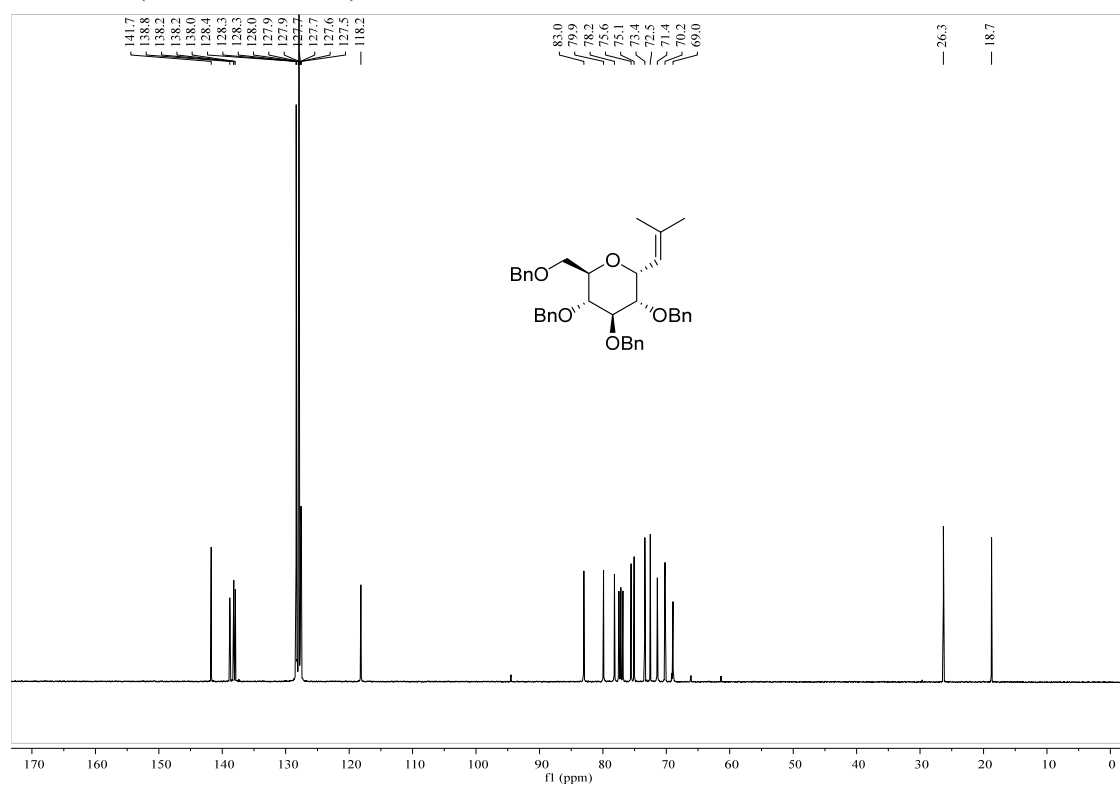

**<sup>1</sup>H NMR (400 MHz, CDCl<sub>3</sub>) of 4g**

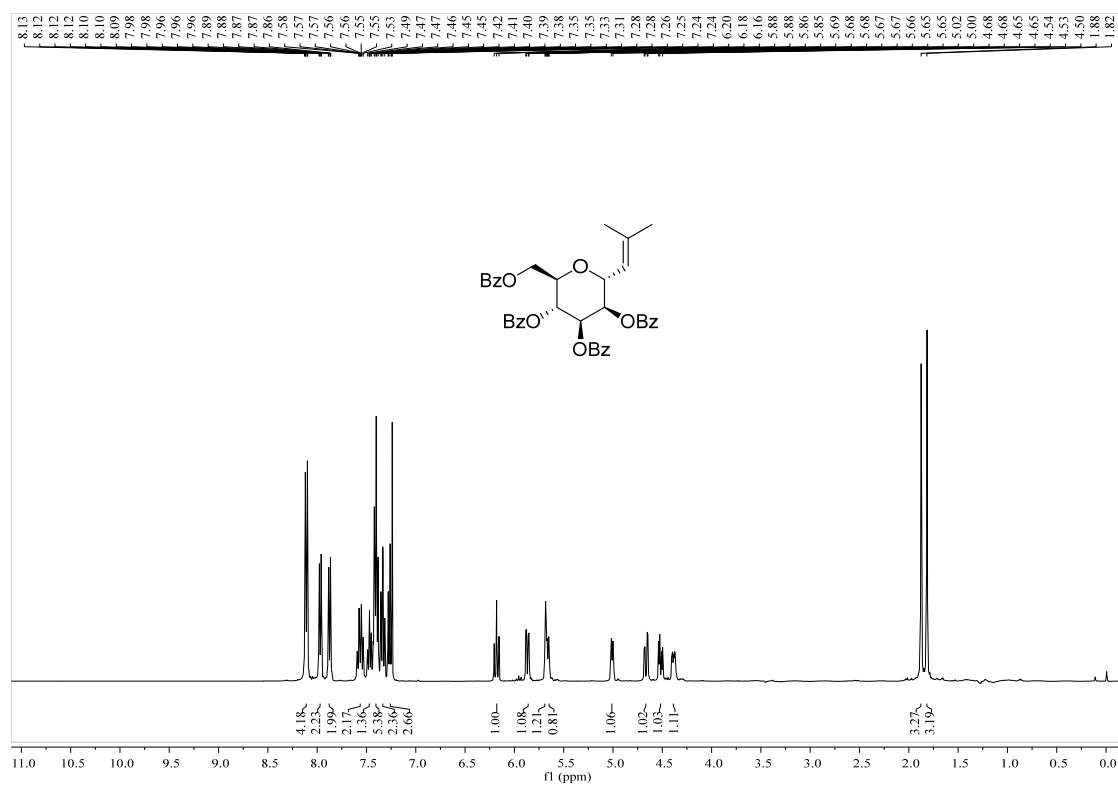

**<sup>13</sup>C NMR (100 MHz, CDCl<sub>3</sub>) of 4g**

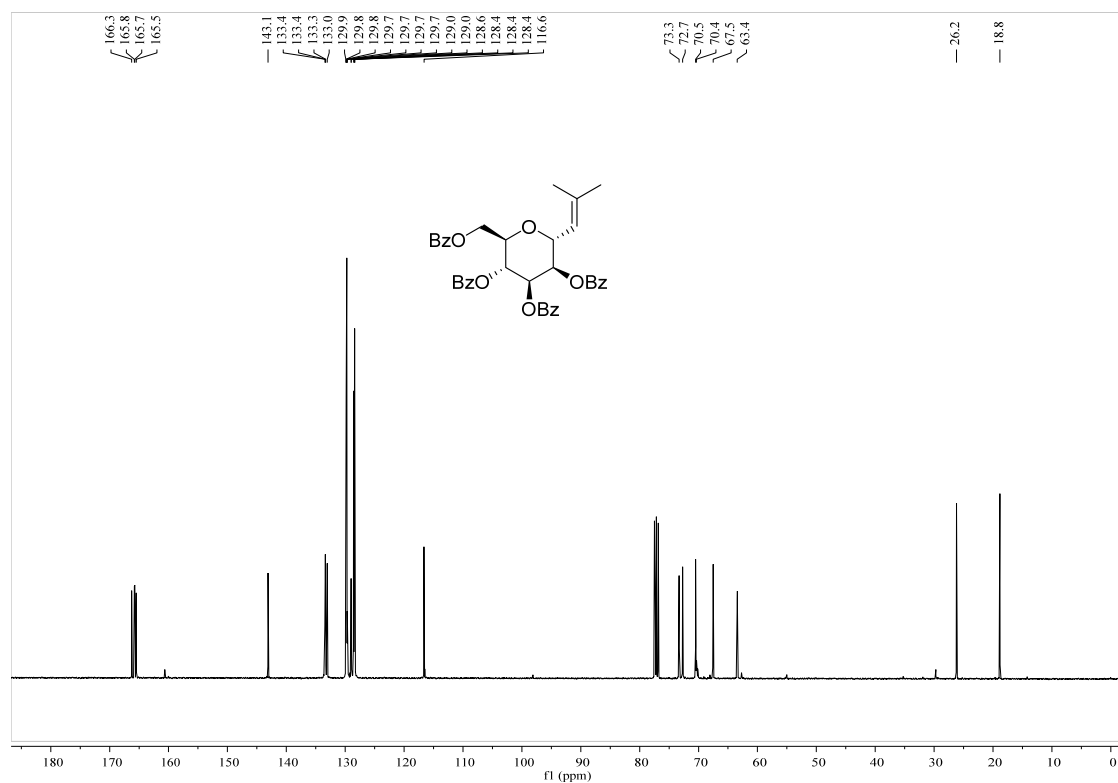

<sup>1</sup>H NMR (400 MHz, CDCl<sub>3</sub>) of 4h

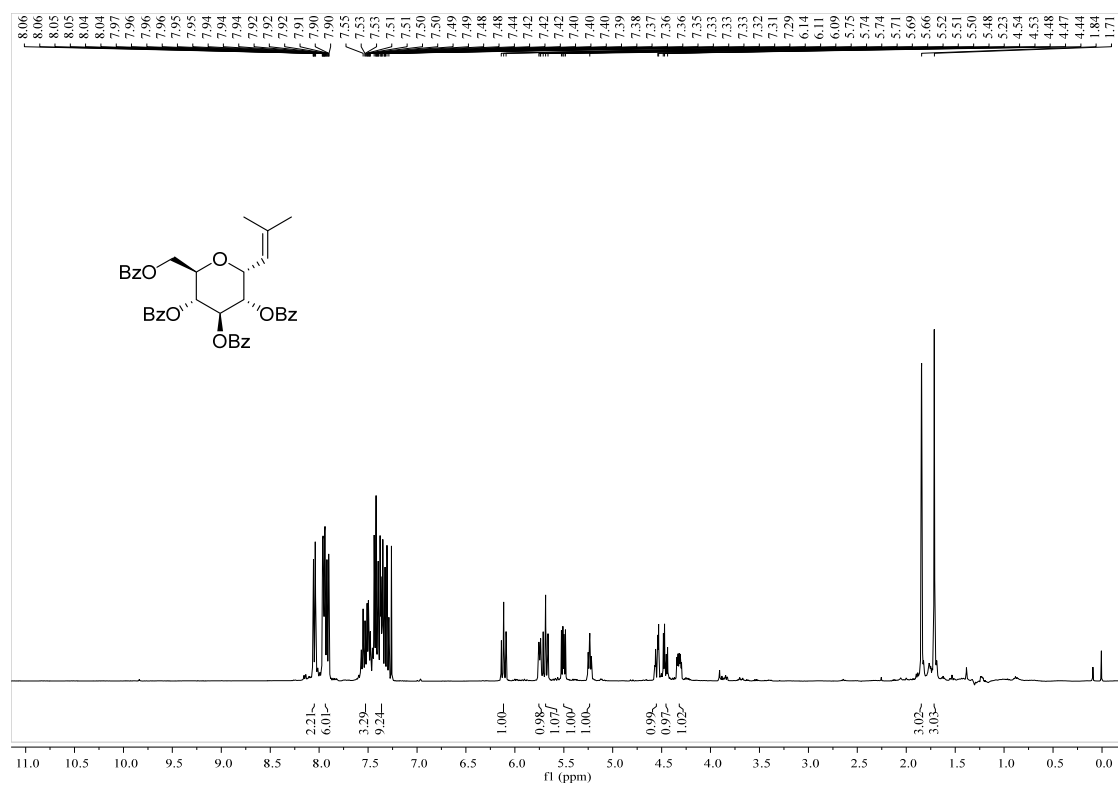

<sup>13</sup>C NMR (100 MHz, CDCl<sub>3</sub>) of 4h

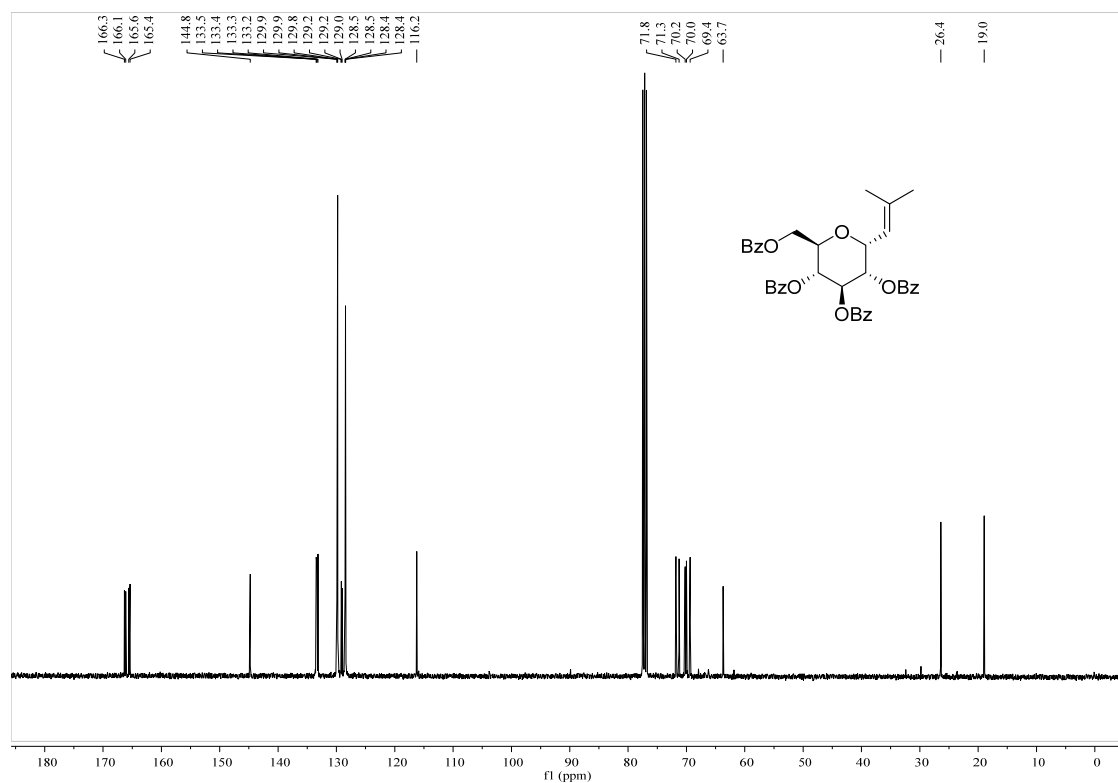

**<sup>1</sup>H NMR (400 MHz, CDCl<sub>3</sub>) of 4i**

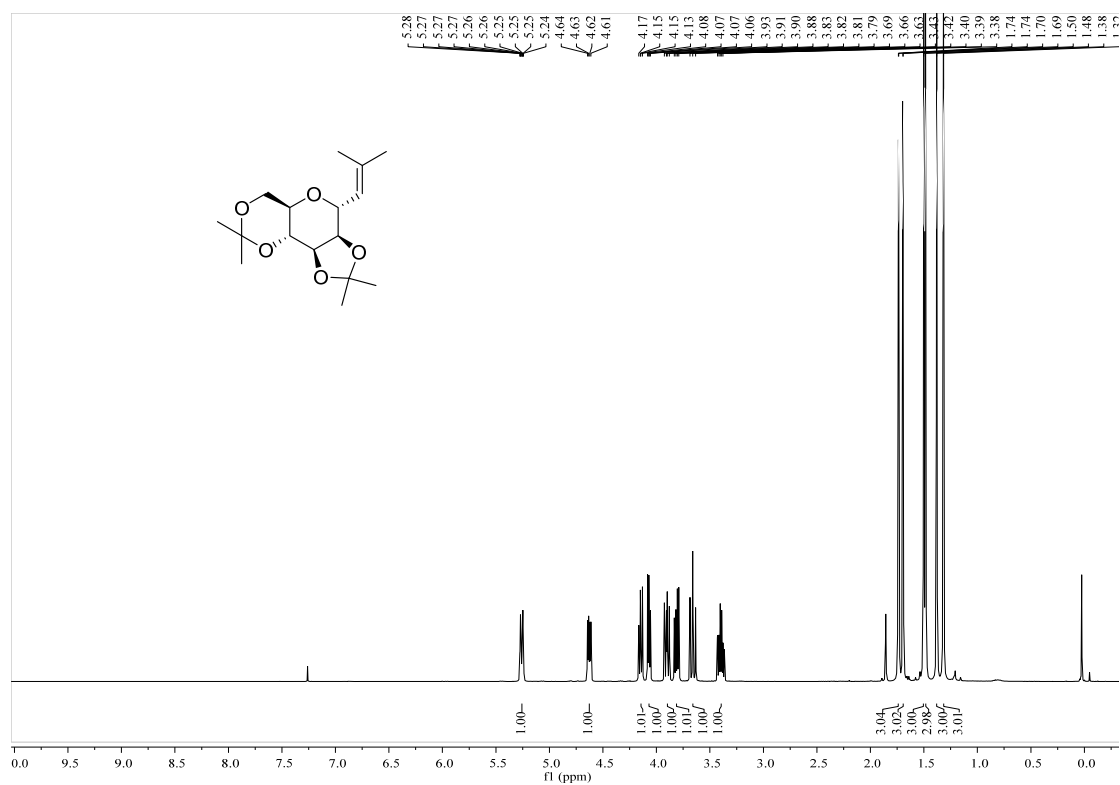

**<sup>13</sup>C NMR (100 MHz, CDCl<sub>3</sub>) of 4i**

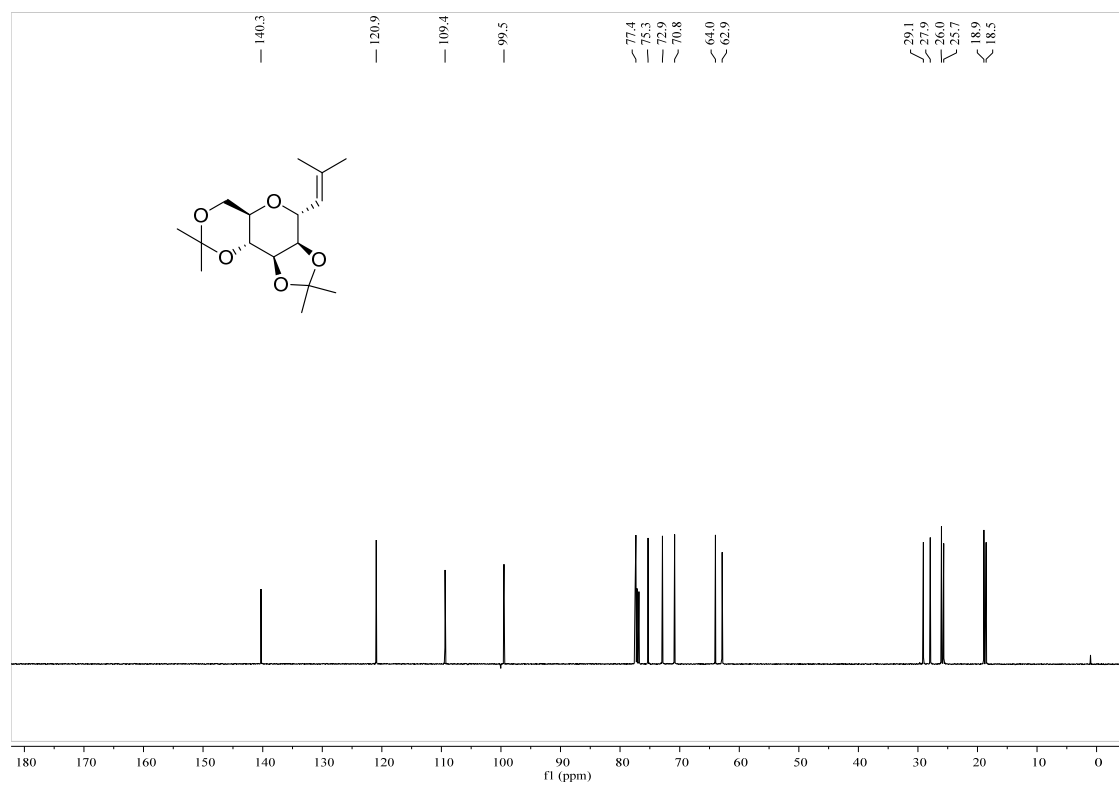

<sup>1</sup>H NMR (400 MHz, CDCl<sub>3</sub>) of **4j**

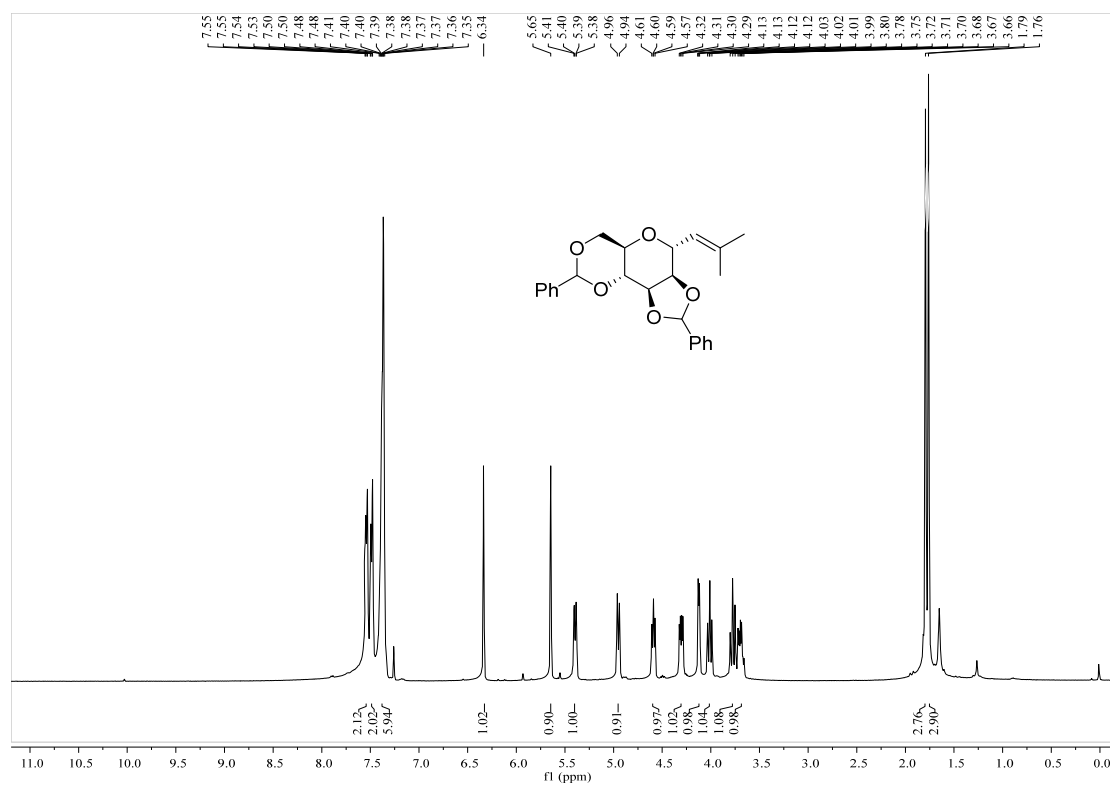

<sup>13</sup>C NMR (100 MHz, CDCl<sub>3</sub>) of **4j**

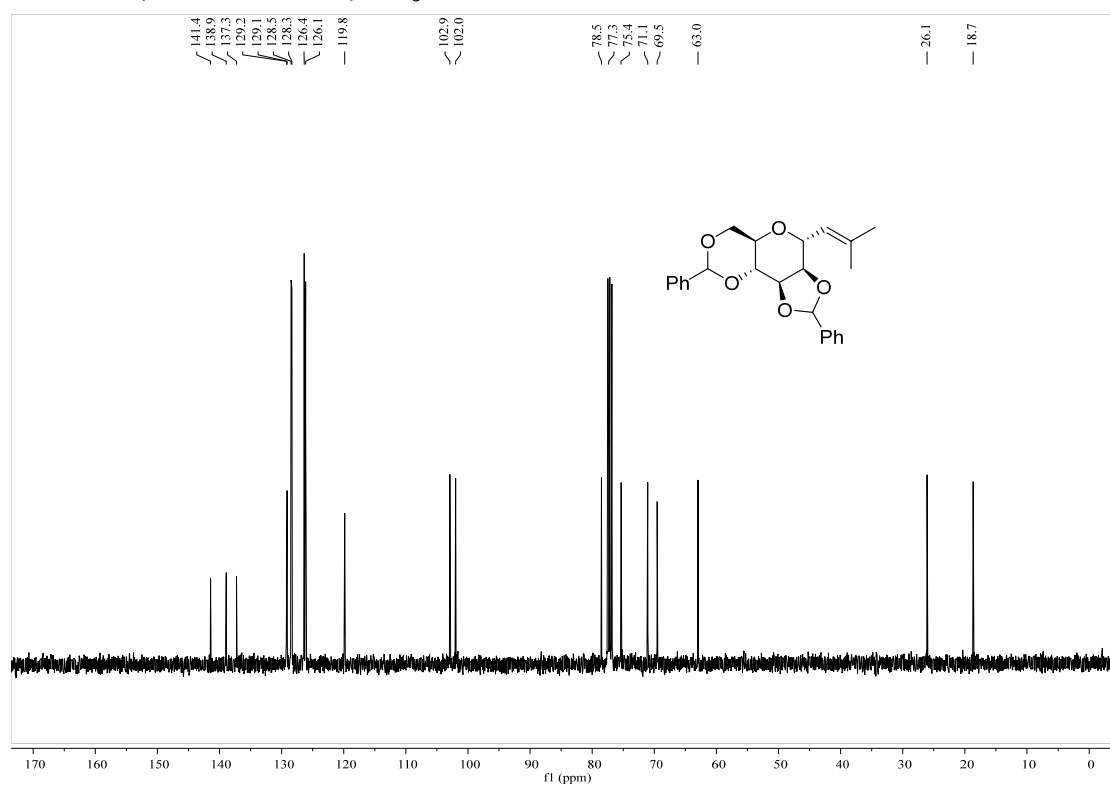



**<sup>1</sup>H NMR (400 MHz, CDCl<sub>3</sub>) of 4k**

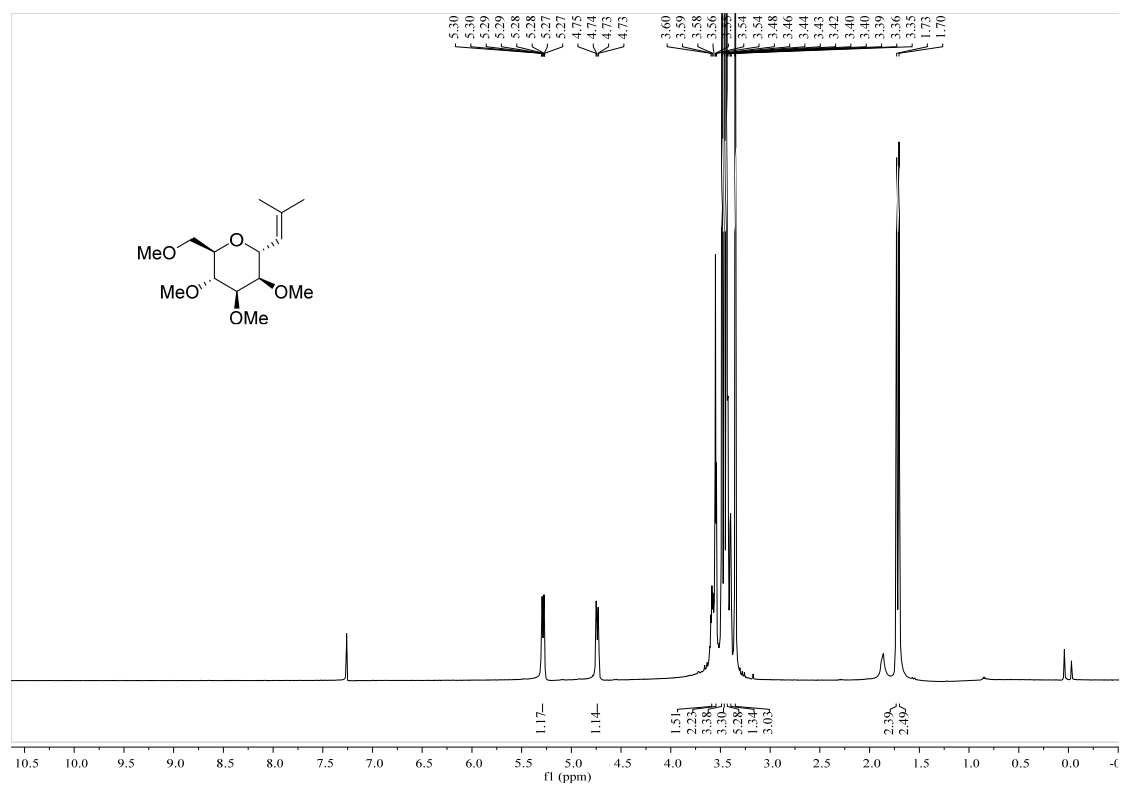

**<sup>13</sup>C NMR (100 MHz, CDCl<sub>3</sub>) of 4k**

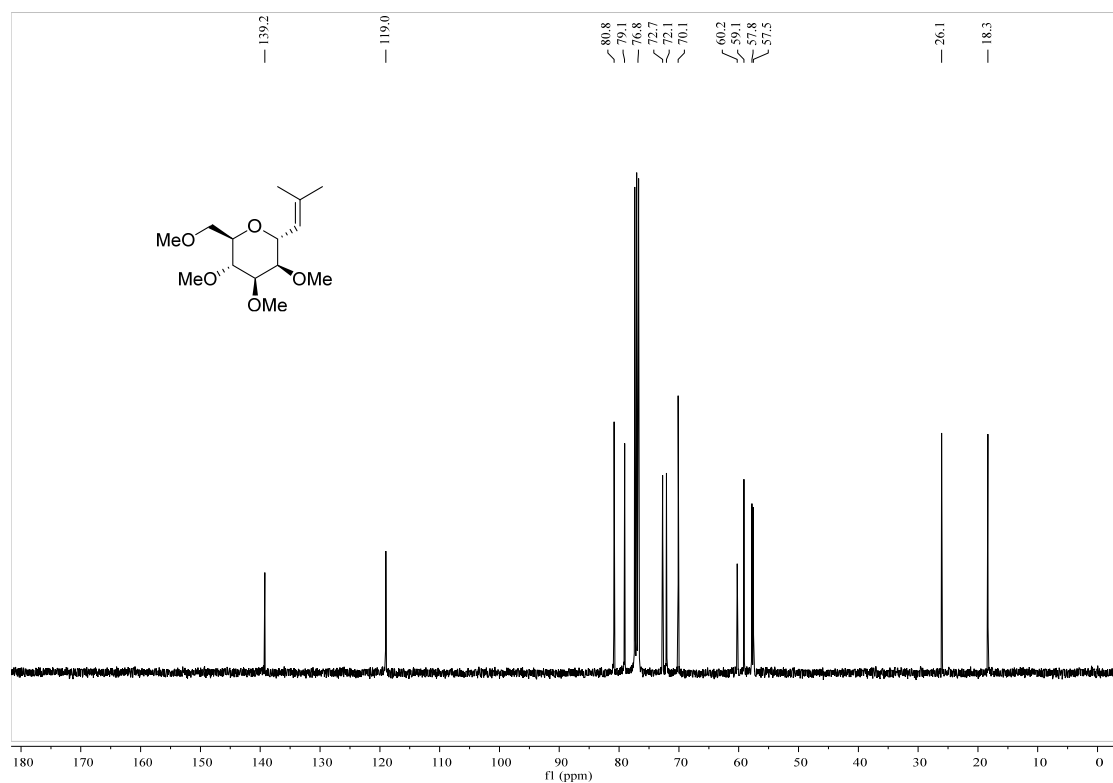

**<sup>1</sup>H NMR (400 MHz, CDCl<sub>3</sub>) of 5a**

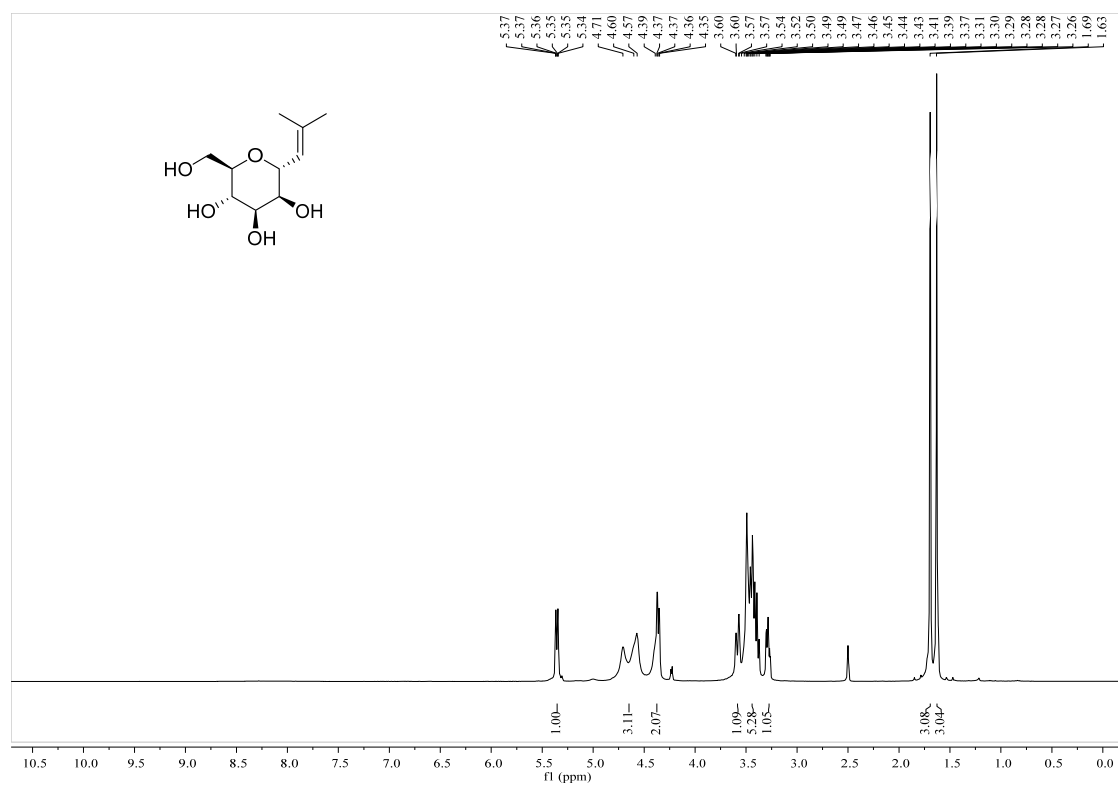

**<sup>13</sup>C NMR (100 MHz, CDCl<sub>3</sub>) of 5a**

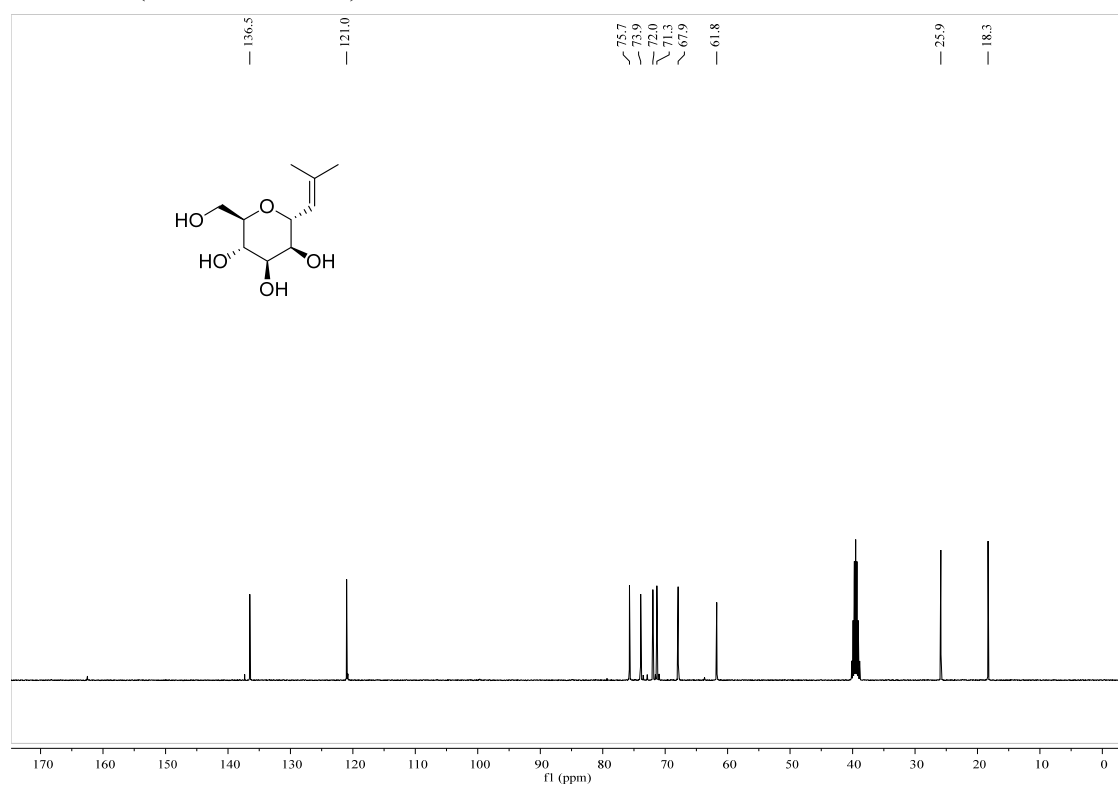

**<sup>1</sup>H NMR (400 MHz, CDCl<sub>3</sub>) of 5b**

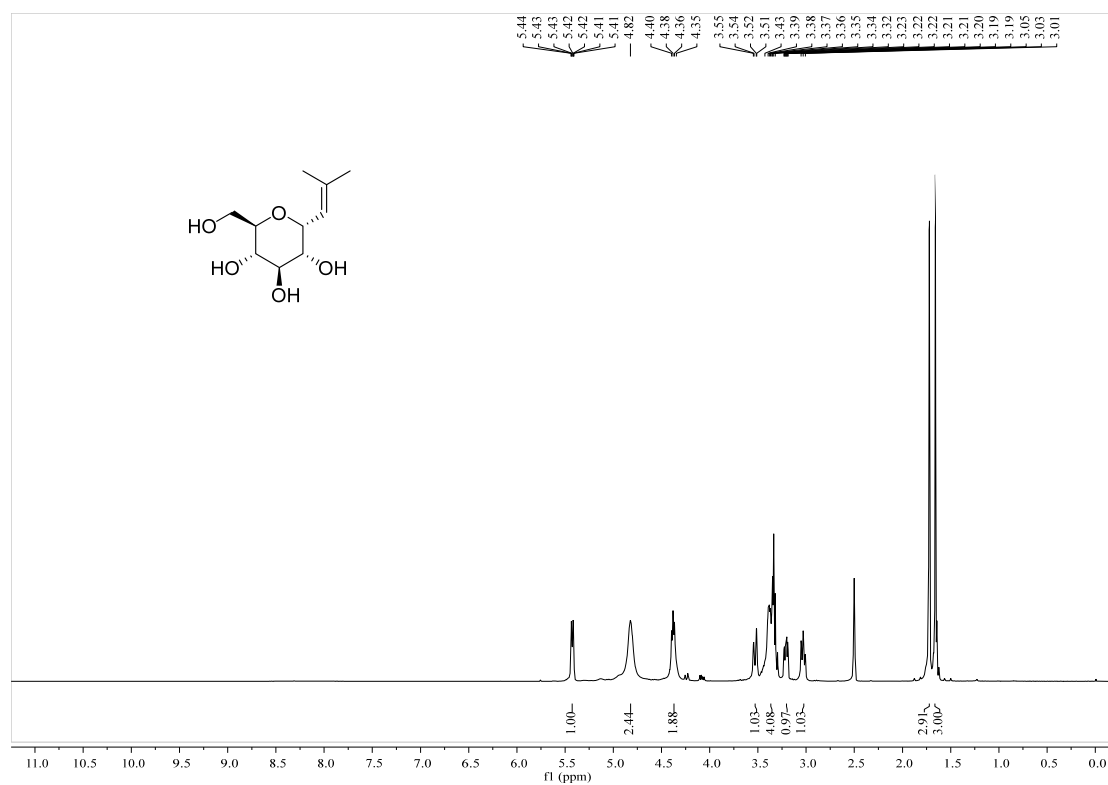

**<sup>13</sup>C NMR (100 MHz, CDCl<sub>3</sub>) of 5b**

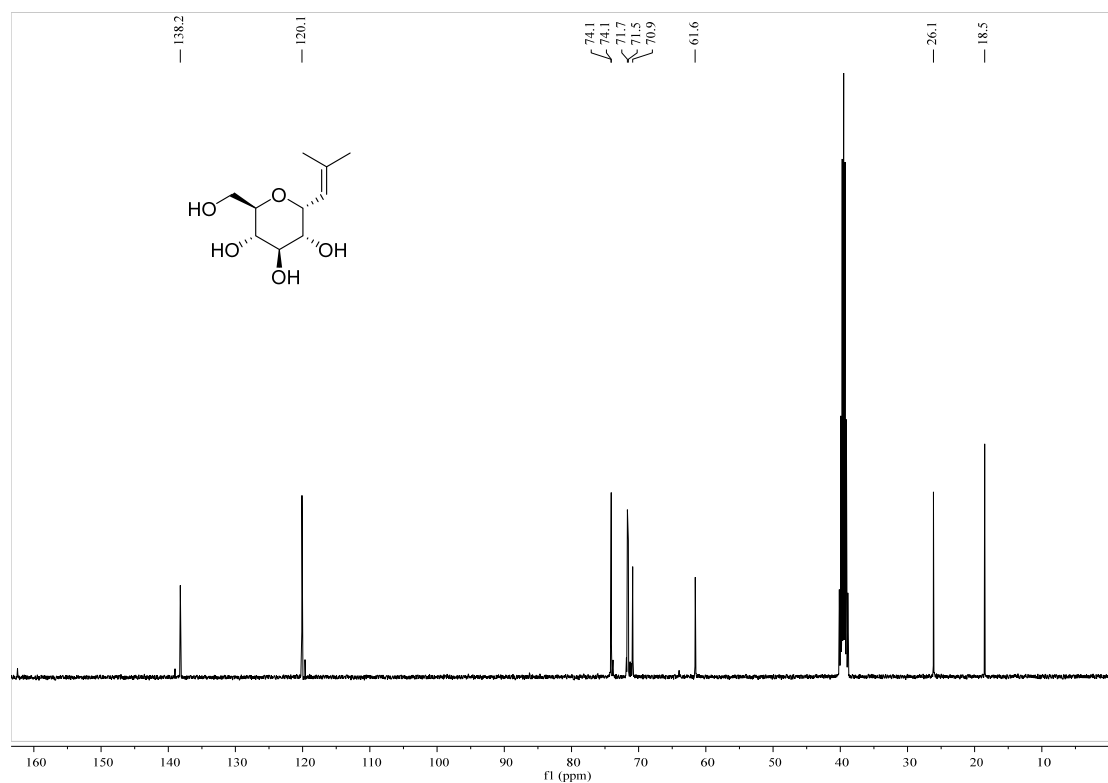

<sup>1</sup>H NMR (400 MHz, CDCl<sub>3</sub>) of **5c**

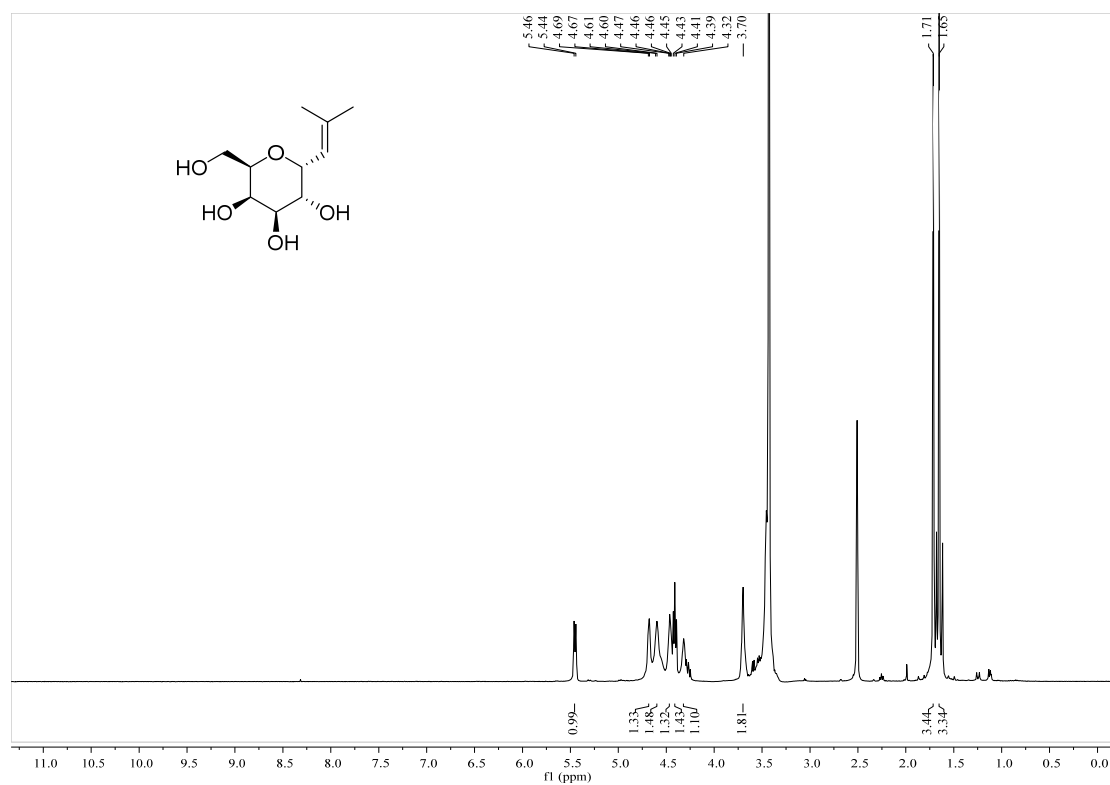

<sup>13</sup>C NMR (100 MHz, CDCl<sub>3</sub>) of **5c**

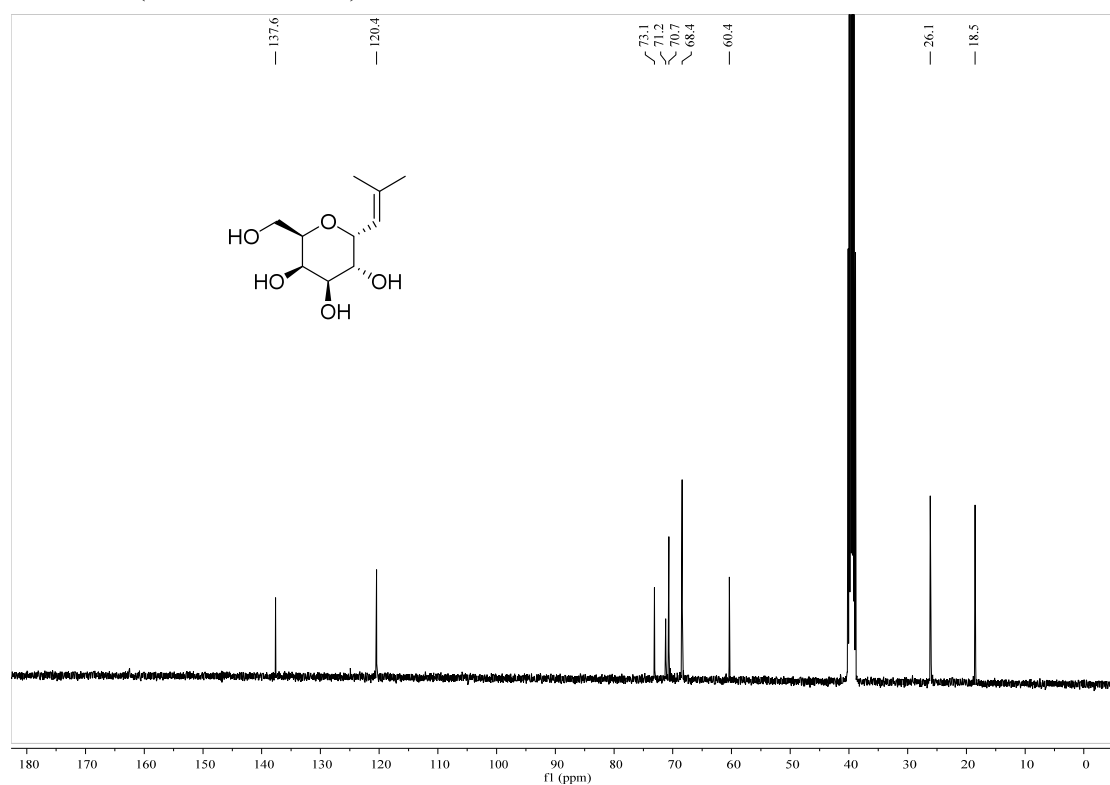

**<sup>1</sup>H NMR (400 MHz, CDCl<sub>3</sub>) of 7a**

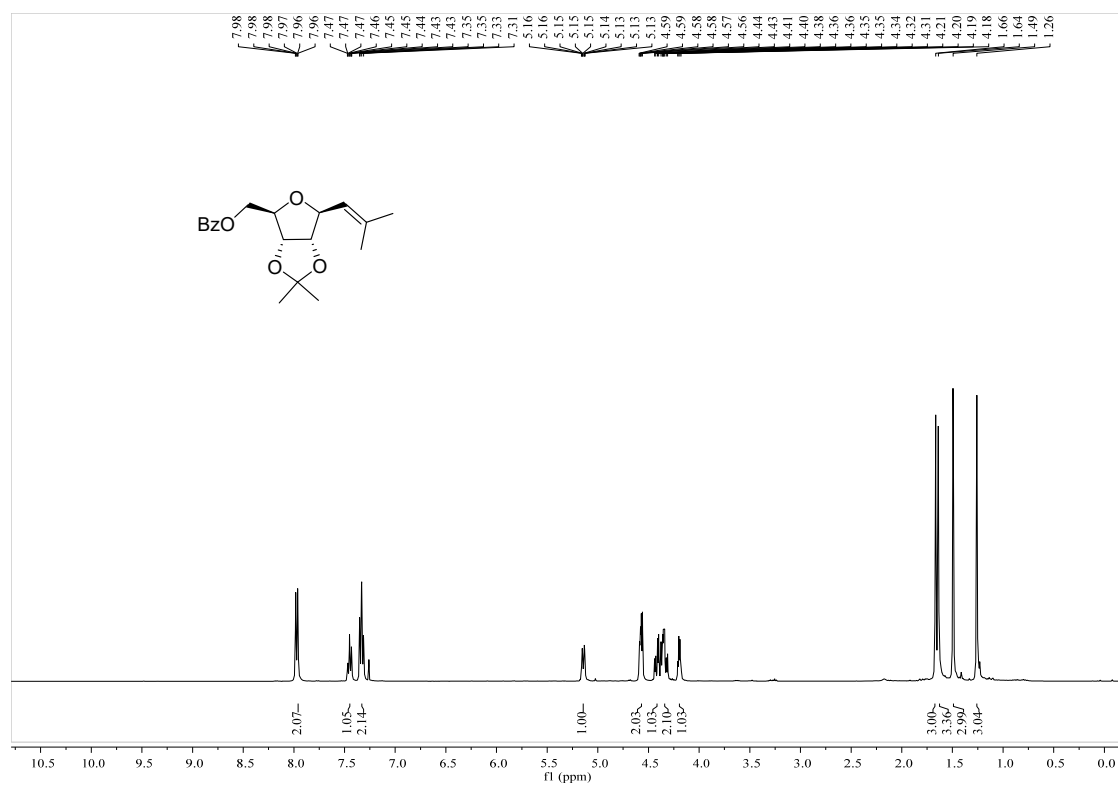

**<sup>13</sup>C NMR (100 MHz, CDCl<sub>3</sub>) of 7a**

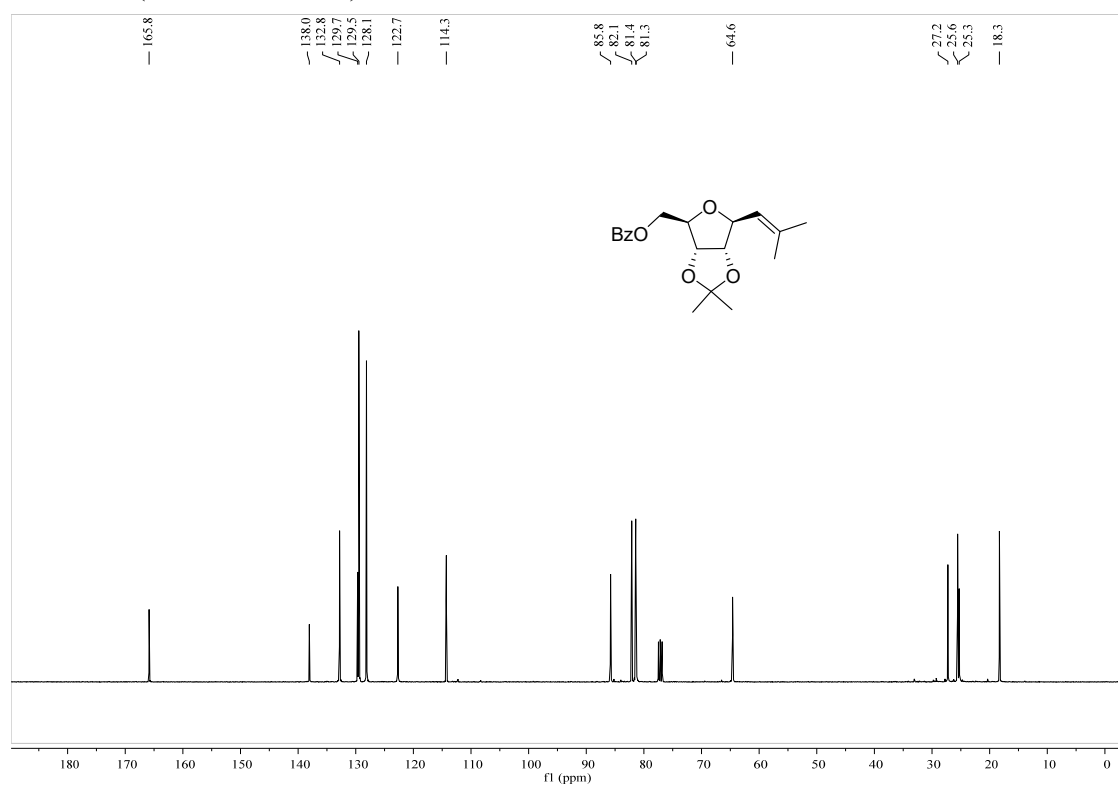

**<sup>1</sup>H NMR (400 MHz, CDCl<sub>3</sub>) of 7b**

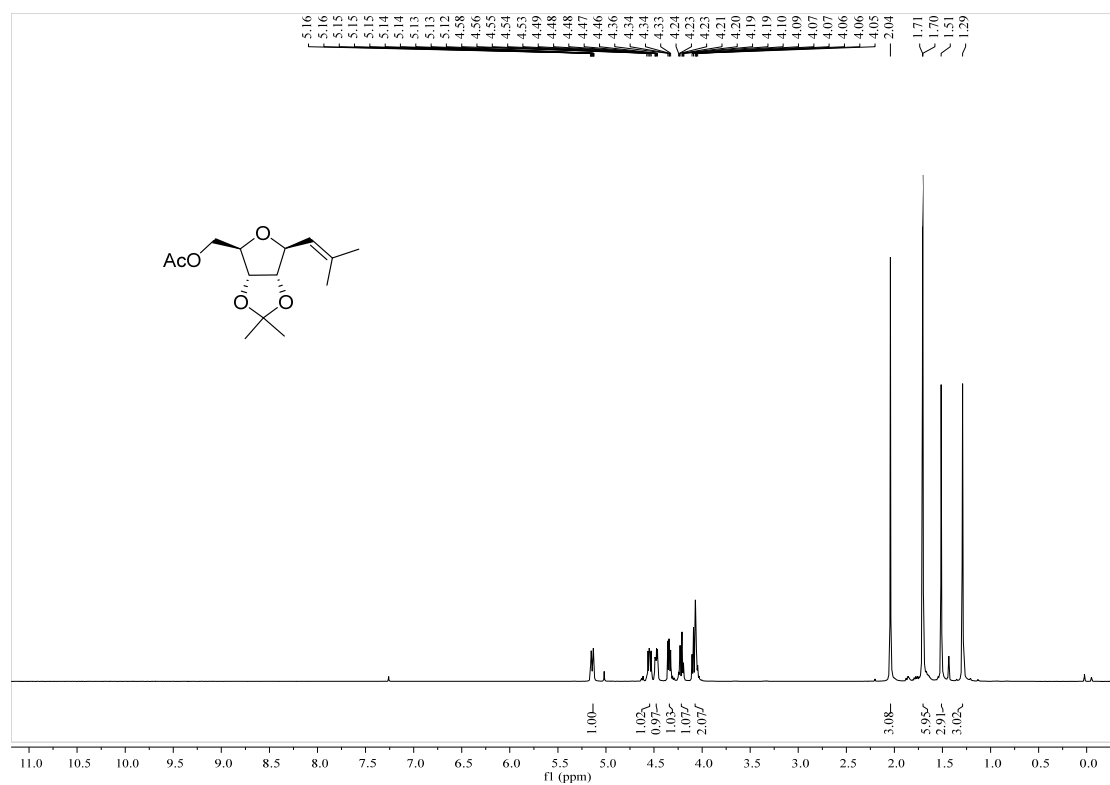

**<sup>13</sup>C NMR (100 MHz, CDCl<sub>3</sub>) of 7b**

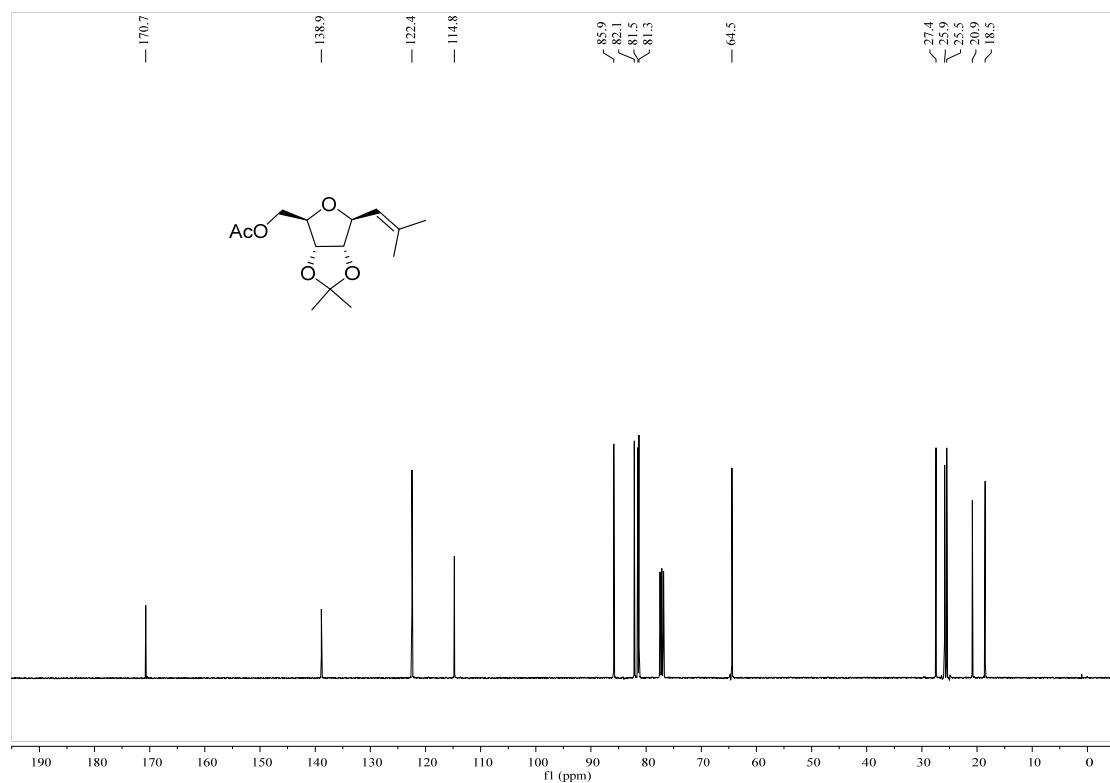

**<sup>1</sup>H NMR (400 MHz, CDCl<sub>3</sub>) of 7c**

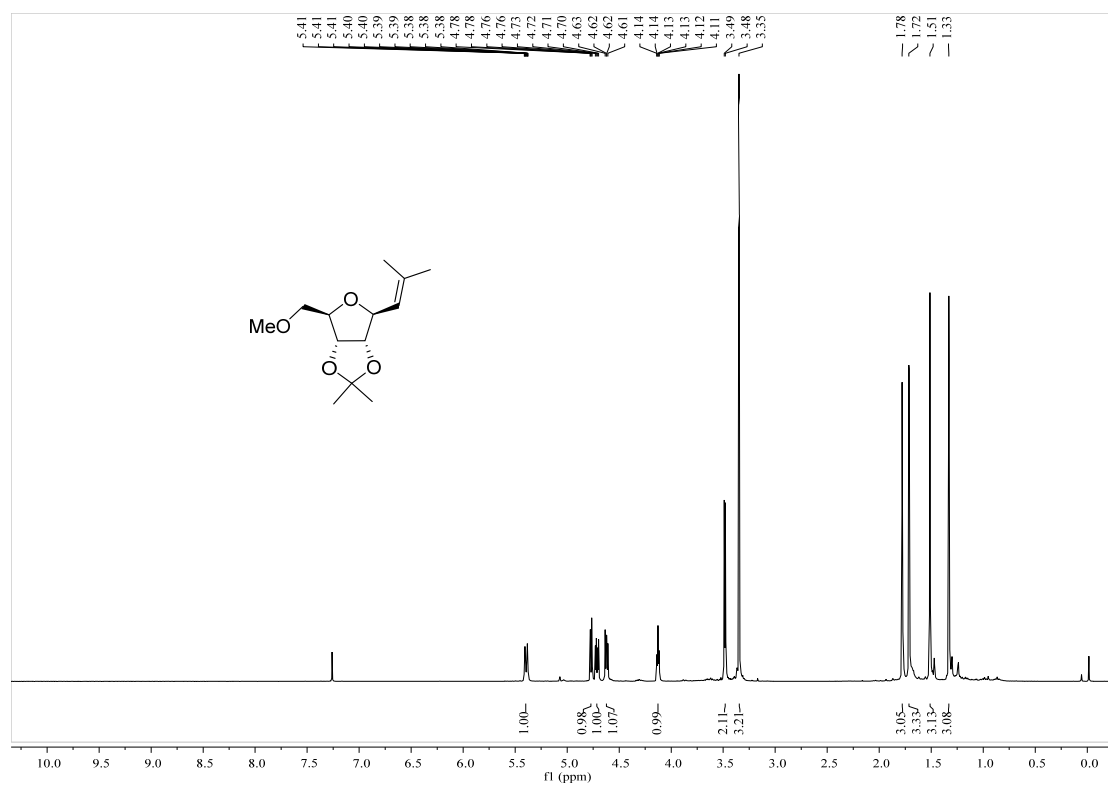

**<sup>13</sup>C NMR (100 MHz, CDCl<sub>3</sub>) of 7c**

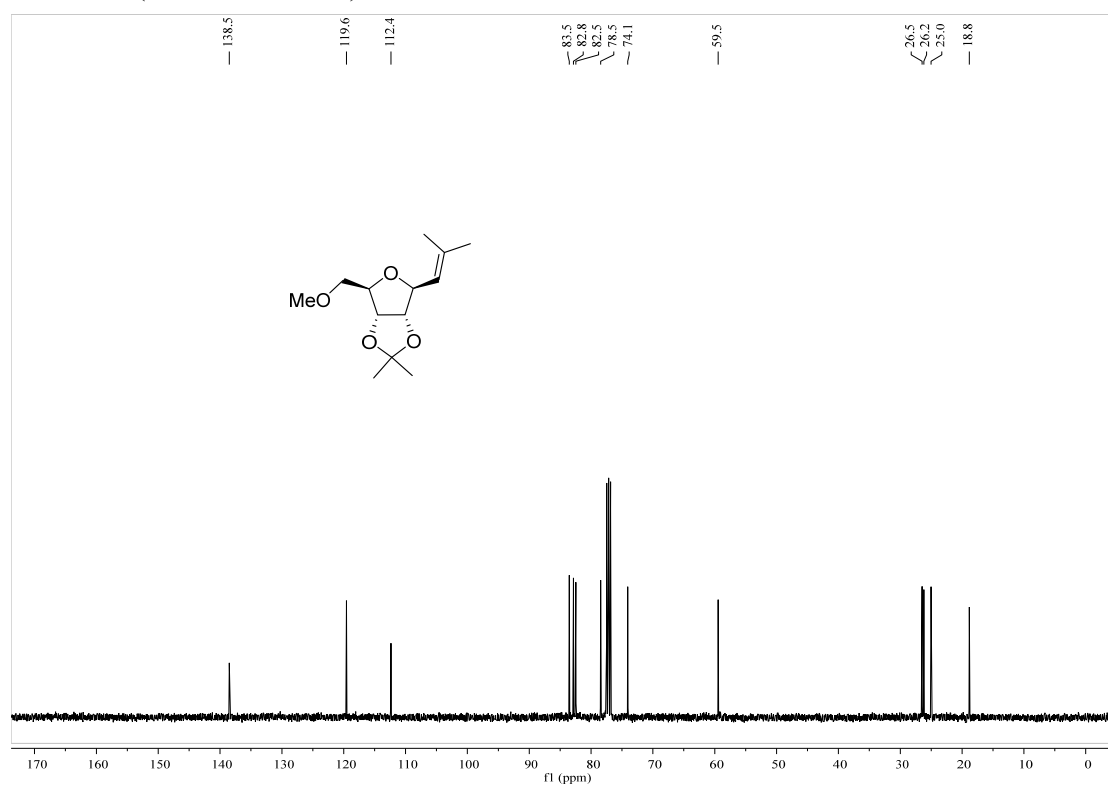

**<sup>1</sup>H NMR (400 MHz, CDCl<sub>3</sub>) of 7d**

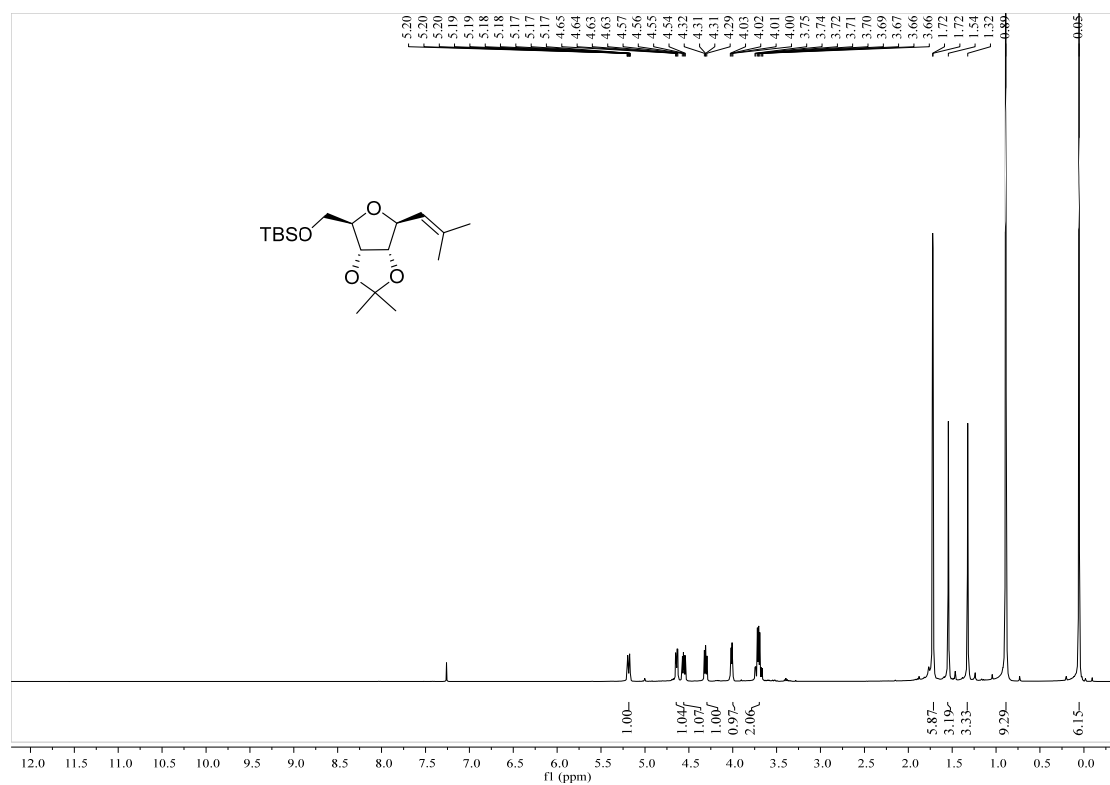

**<sup>13</sup>C NMR (100 MHz, CDCl<sub>3</sub>) of 7d**

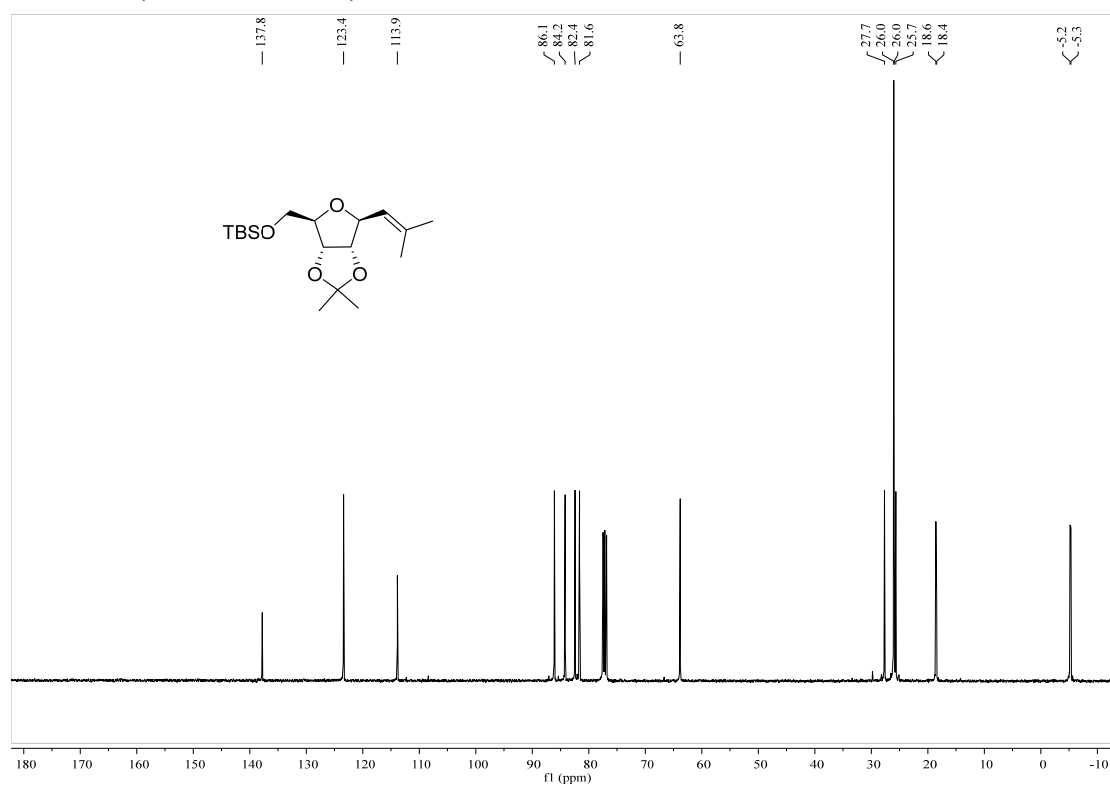



<sup>1</sup>H NMR (400 MHz, CDCl<sub>3</sub>) of 7e

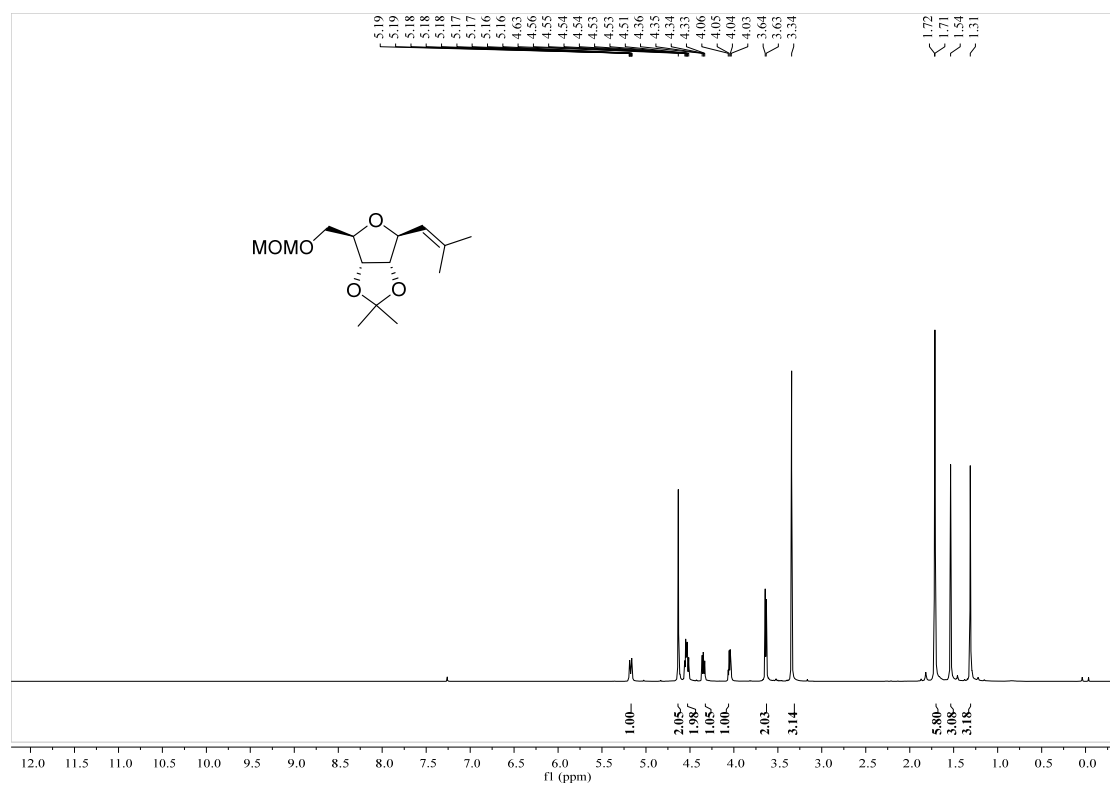

<sup>13</sup>C NMR (100 MHz, CDCl<sub>3</sub>) of 7e

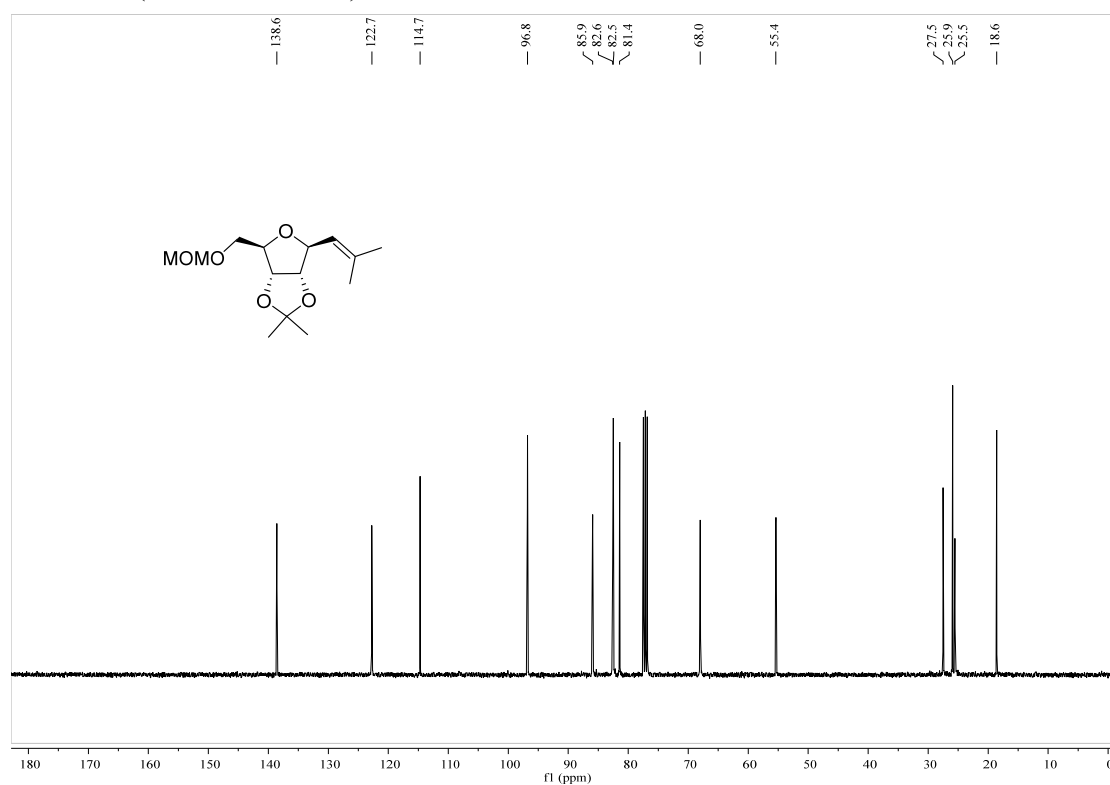

**<sup>1</sup>H NMR (400 MHz, CDCl<sub>3</sub>) of 7f**

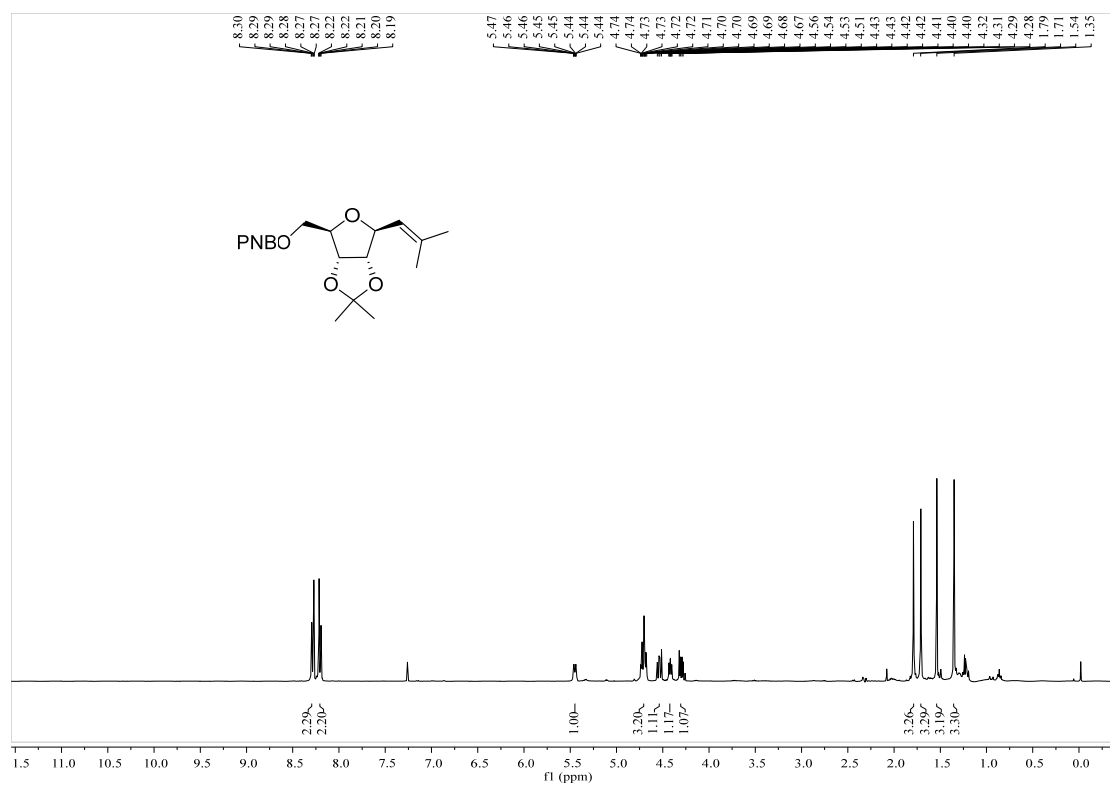

**<sup>13</sup>C NMR (100 MHz, CDCl<sub>3</sub>) of 7f**

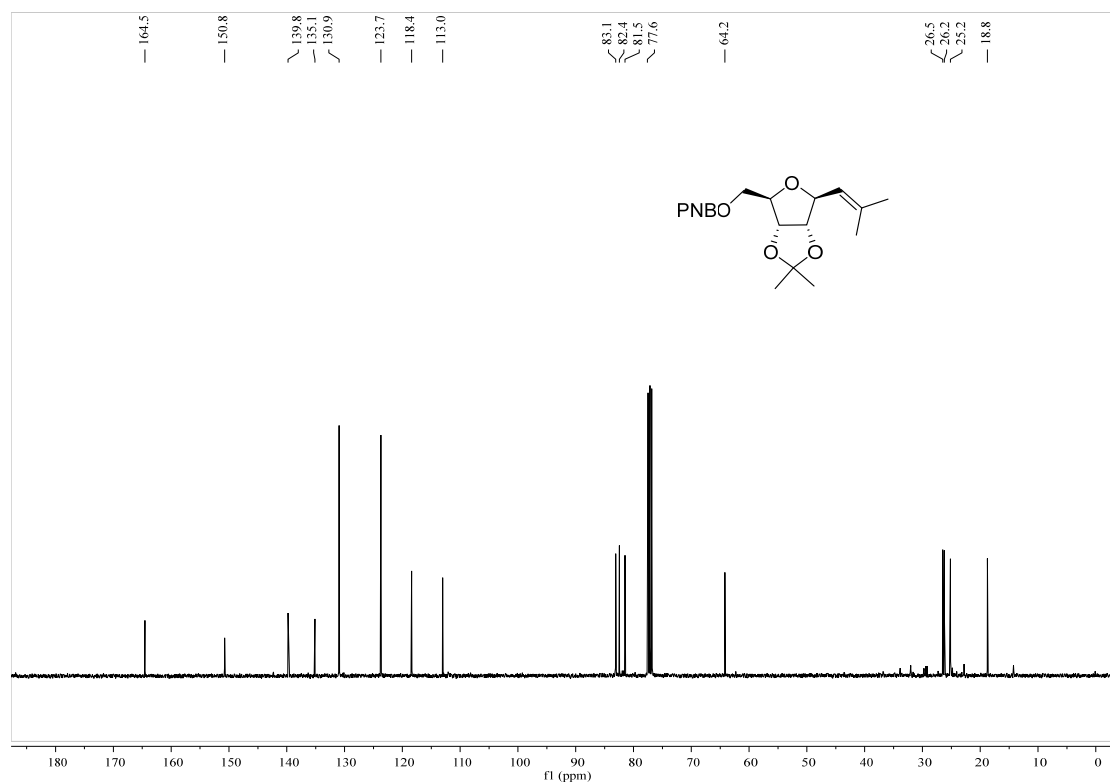

<sup>1</sup>H NMR (400 MHz, CDCl<sub>3</sub>) of **7g**

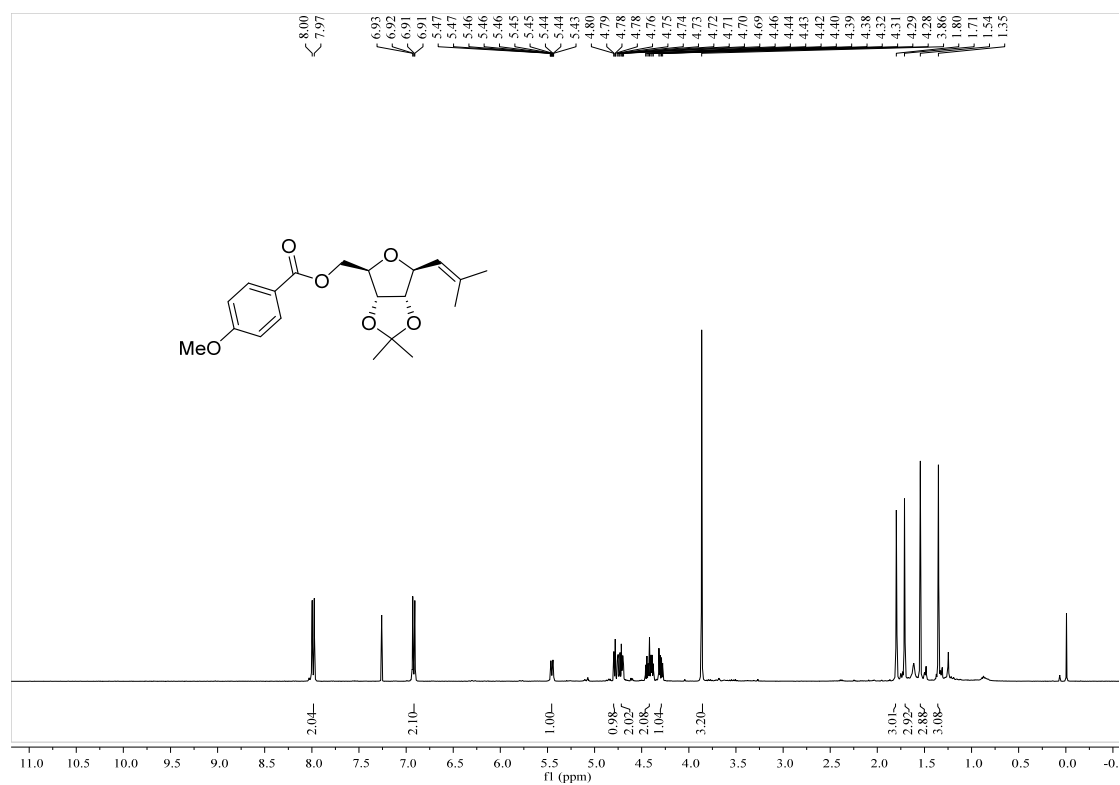

<sup>13</sup>C NMR (100 MHz, CDCl<sub>3</sub>) of **7g**

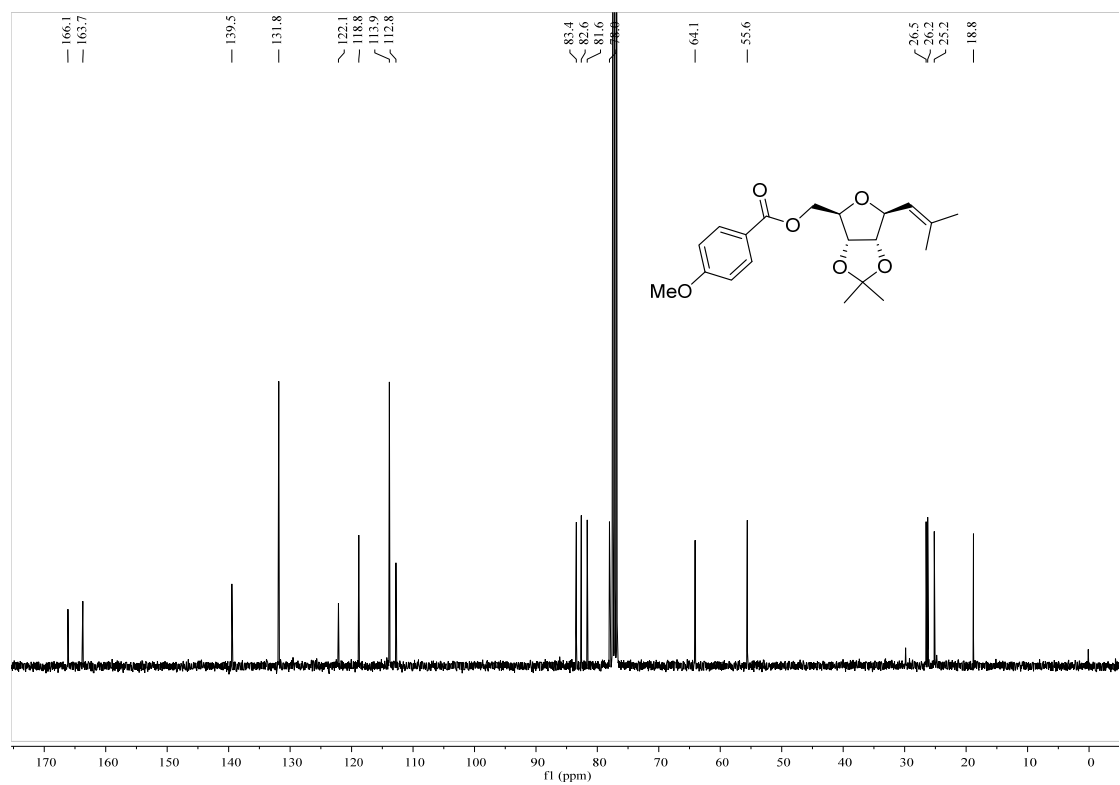

**<sup>1</sup>H NMR (400 MHz, CDCl<sub>3</sub>) of 7h**

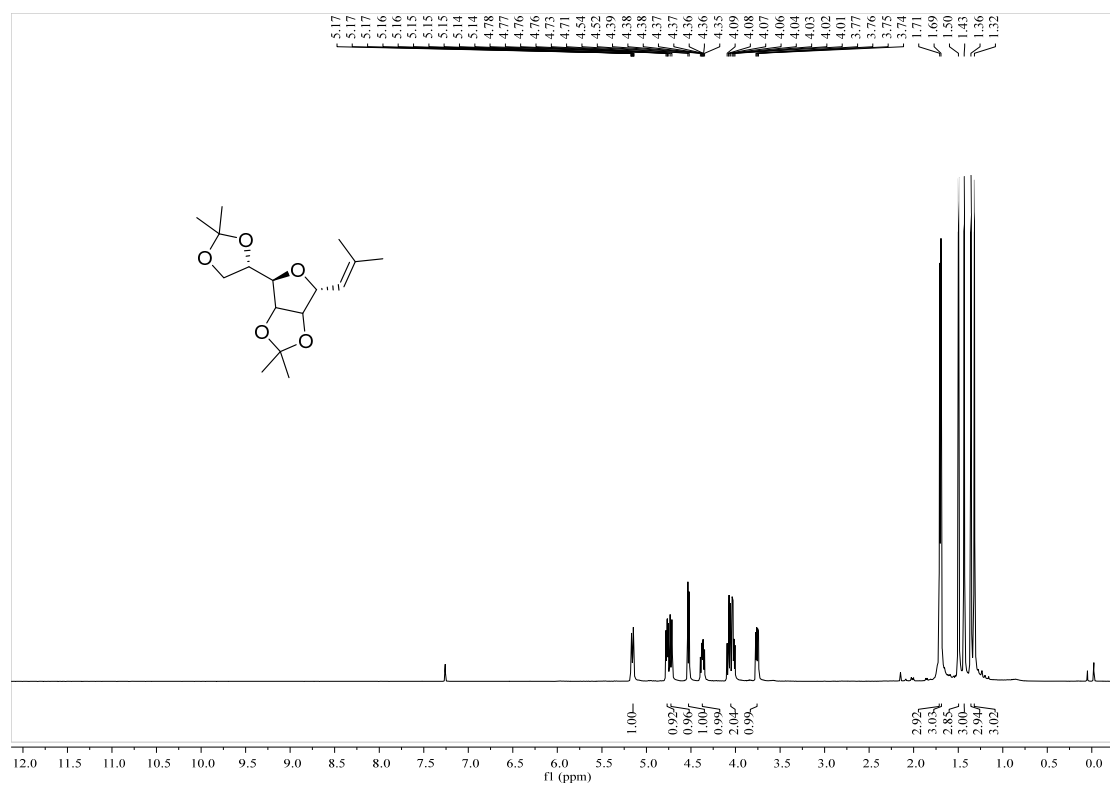

**<sup>13</sup>C NMR (100 MHz, CDCl<sub>3</sub>) of 7h**

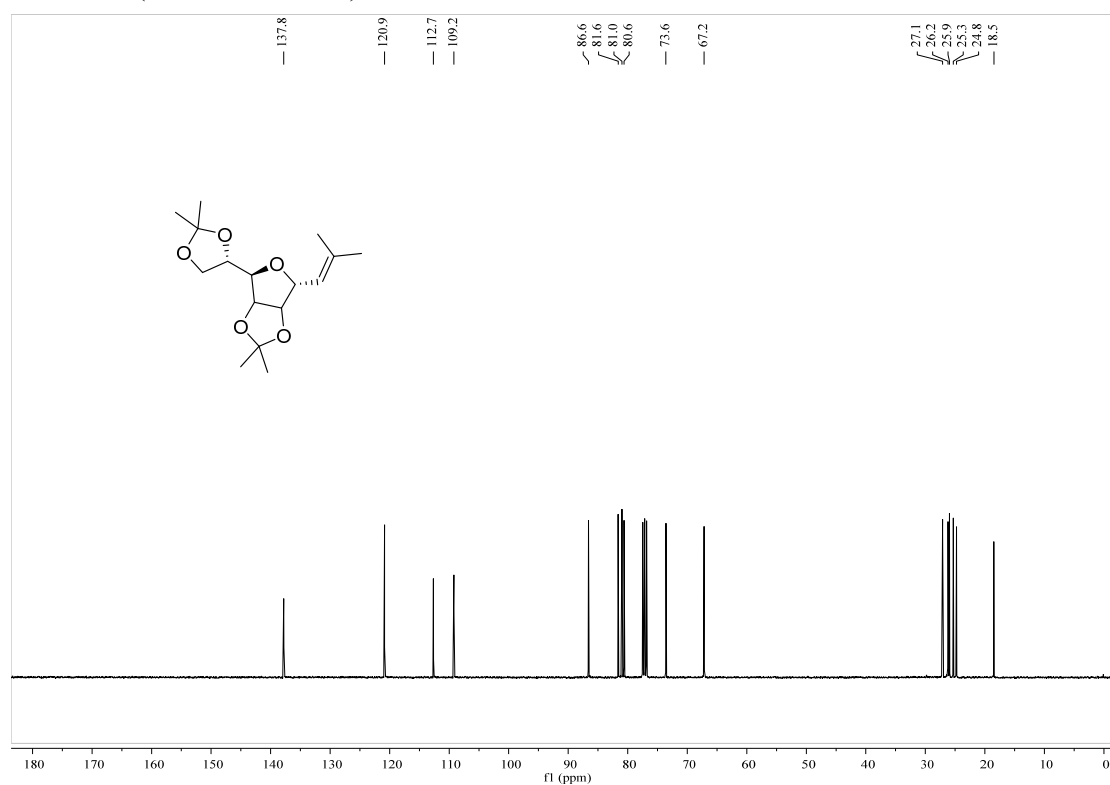

<sup>1</sup>H NMR (400 MHz, CDCl<sub>3</sub>) of **7i**

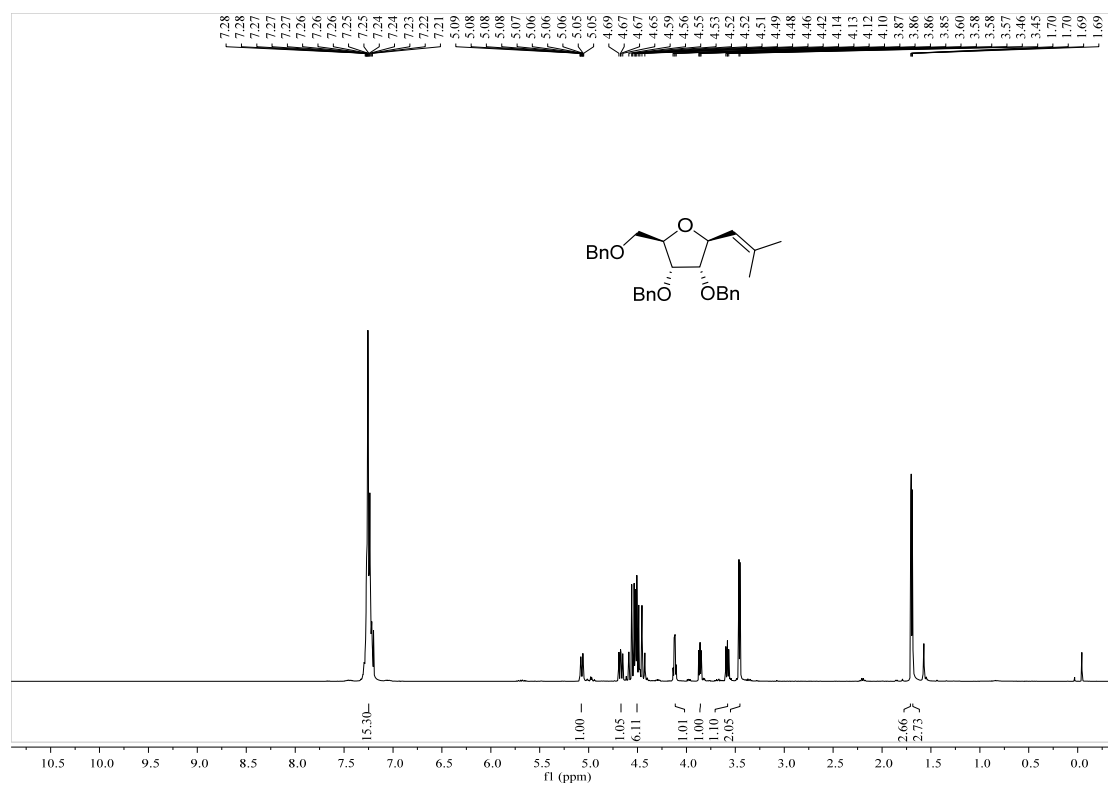

<sup>13</sup>C NMR (100 MHz, CDCl<sub>3</sub>) of **7i**

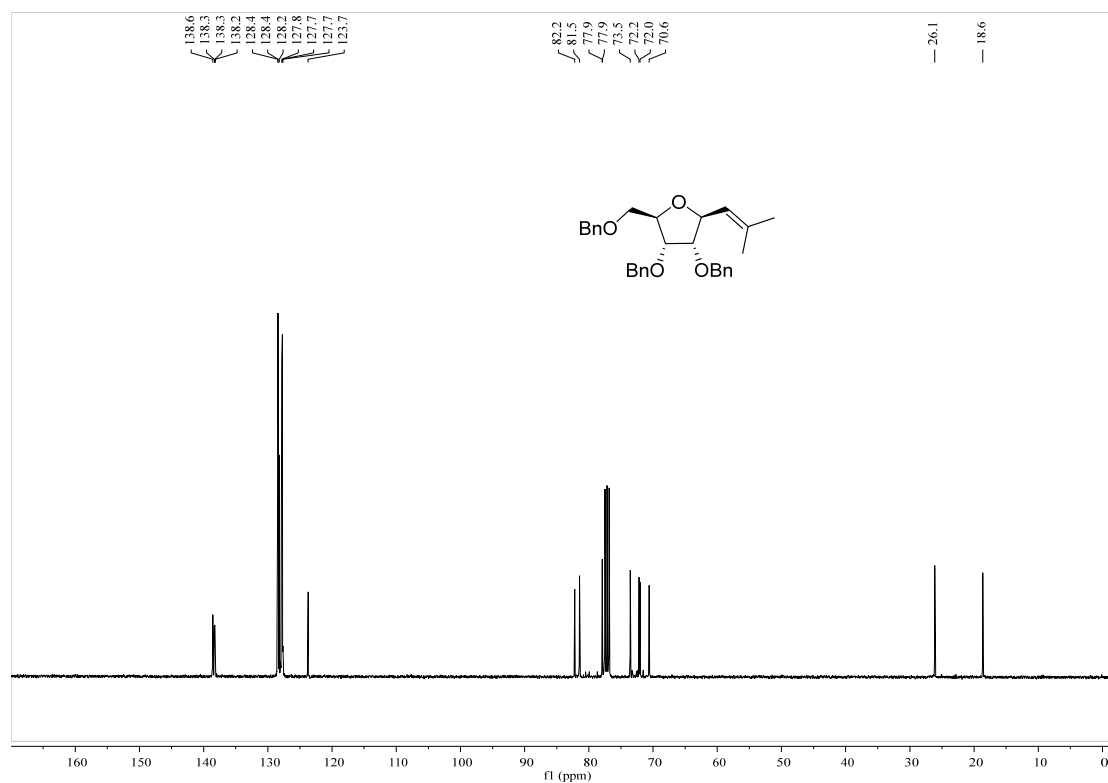

<sup>1</sup>H NMR (400 MHz, CDCl<sub>3</sub>) of 2

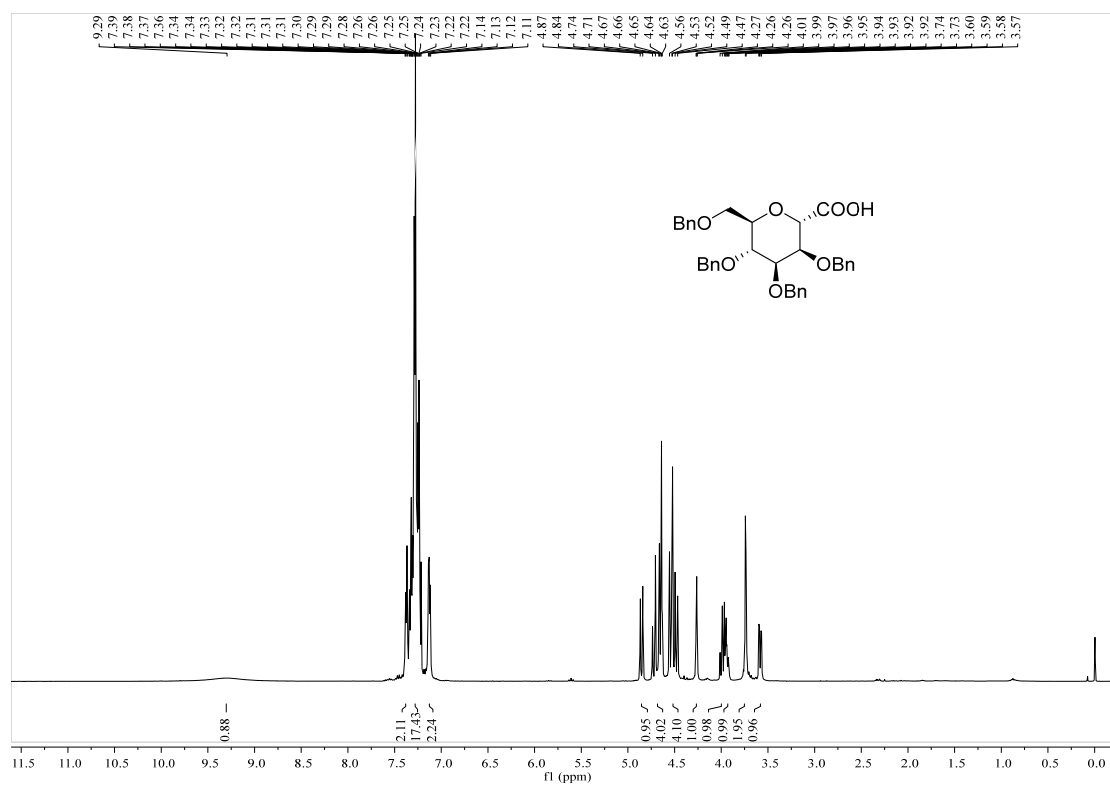

<sup>13</sup>C NMR (100 MHz, CDCl<sub>3</sub>) of 2

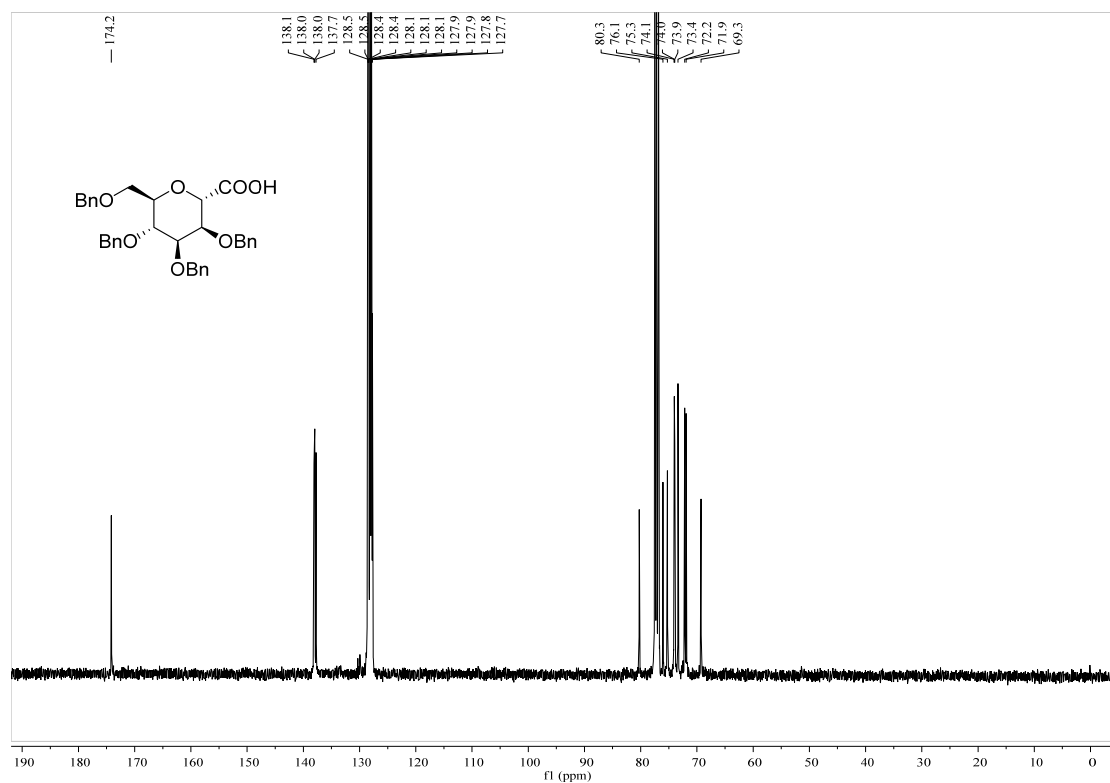

<sup>1</sup>H NMR (400 MHz, CDCl<sub>3</sub>) of **9**

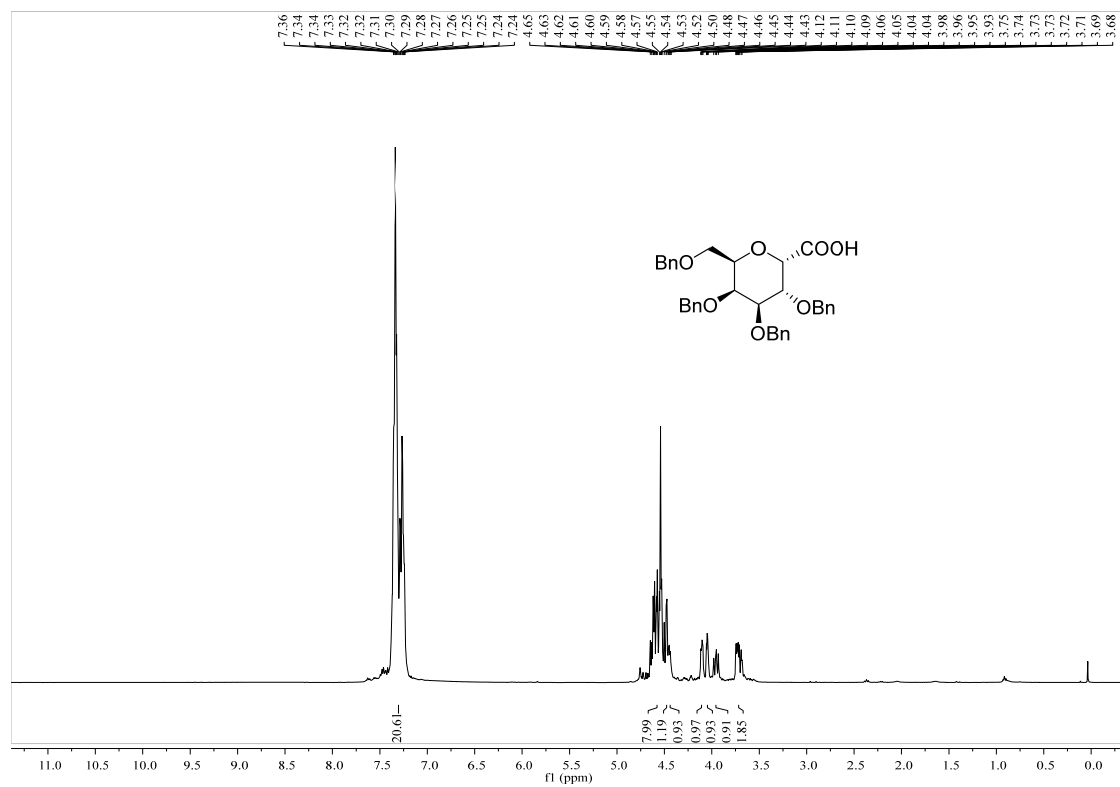

<sup>13</sup>C NMR (100 MHz, CDCl<sub>3</sub>) of **9**

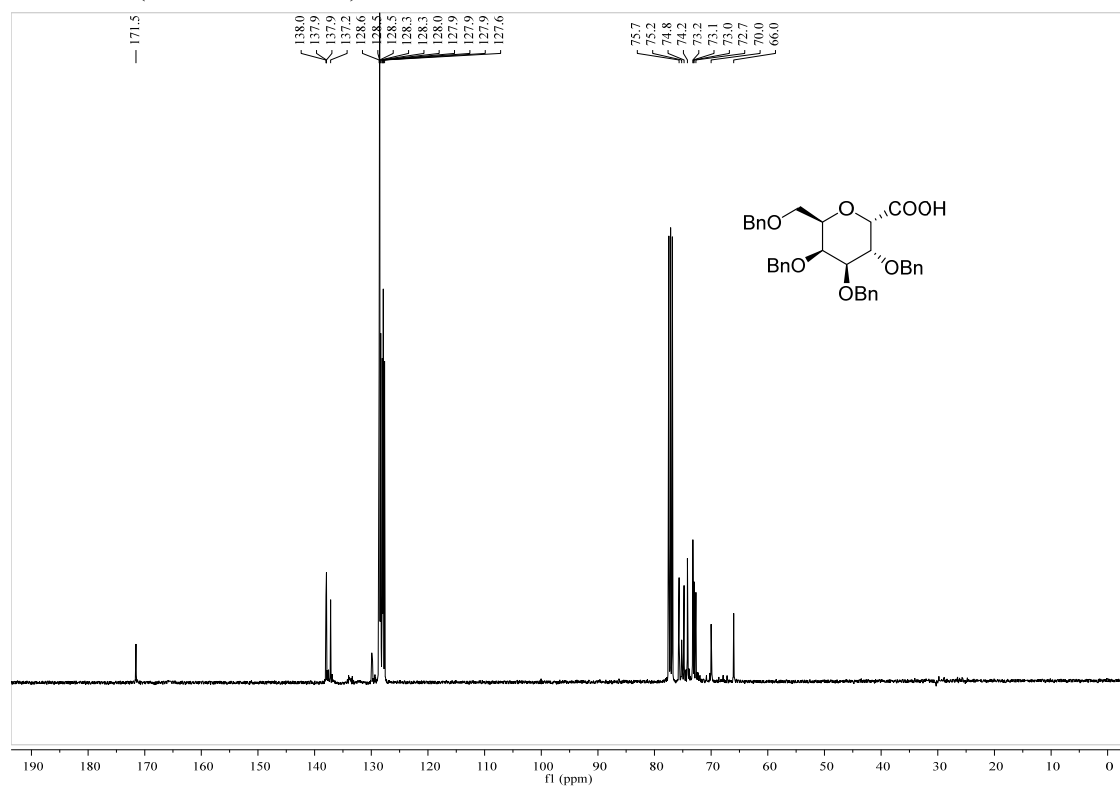

<sup>1</sup>H NMR (400 MHz, CDCl<sub>3</sub>) of **10**

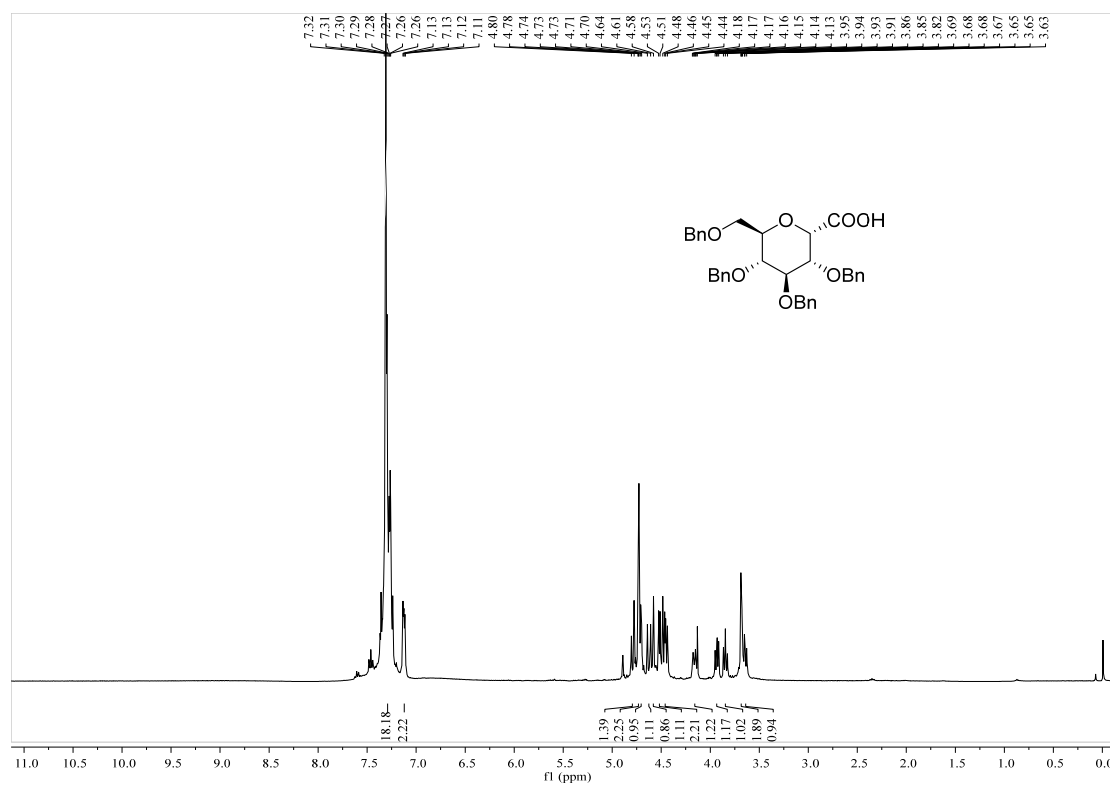

<sup>13</sup>C NMR (100 MHz, CDCl<sub>3</sub>) of **10**

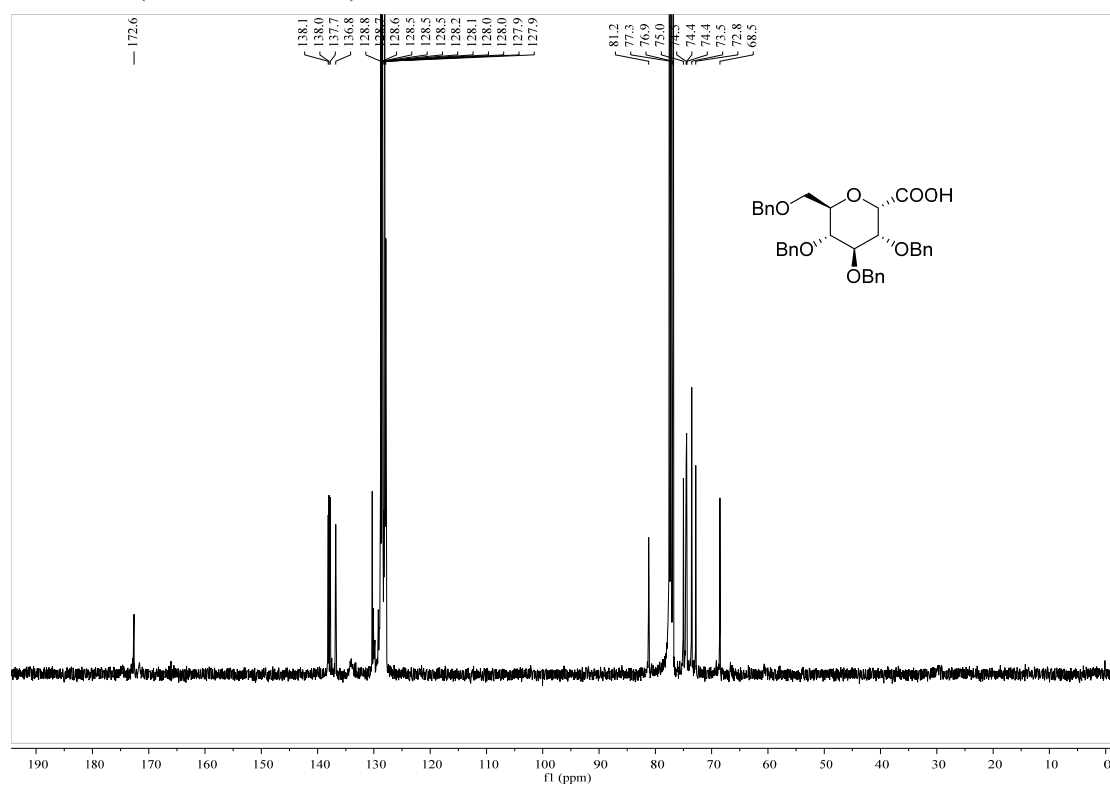



<sup>1</sup>H NMR (400 MHz, CDCl<sub>3</sub>) of **11**

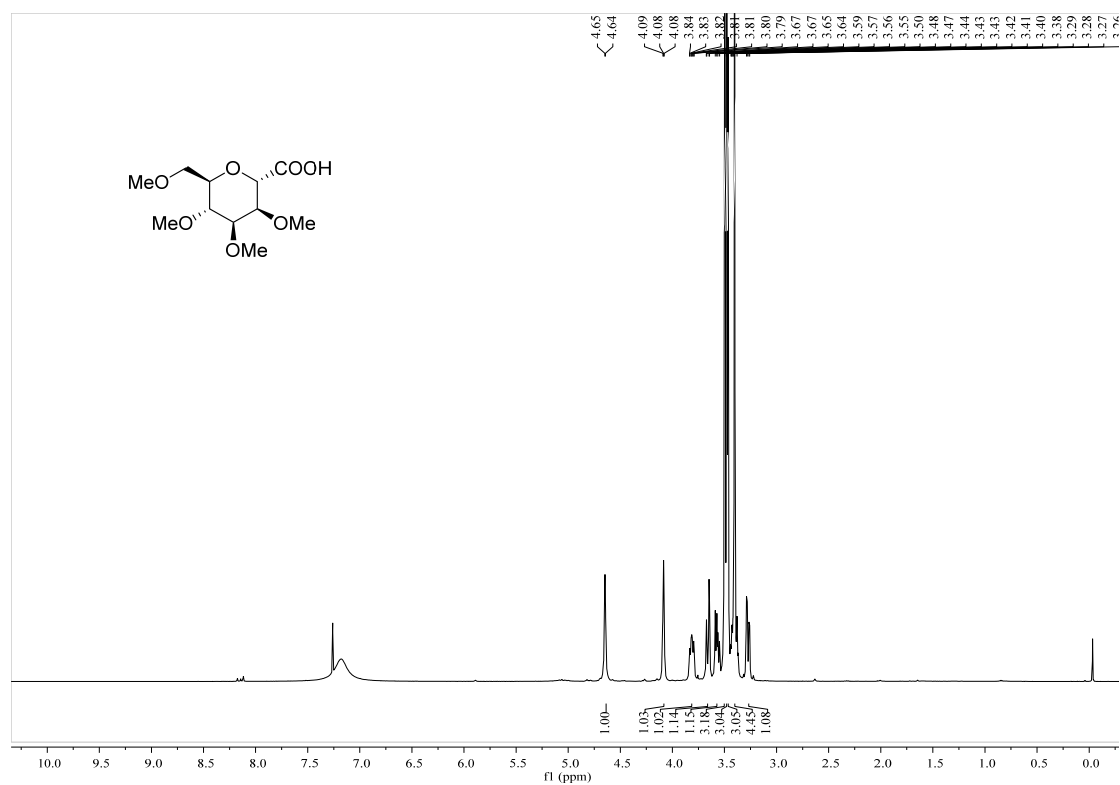

<sup>13</sup>C NMR (100 MHz, CDCl<sub>3</sub>) of **11**

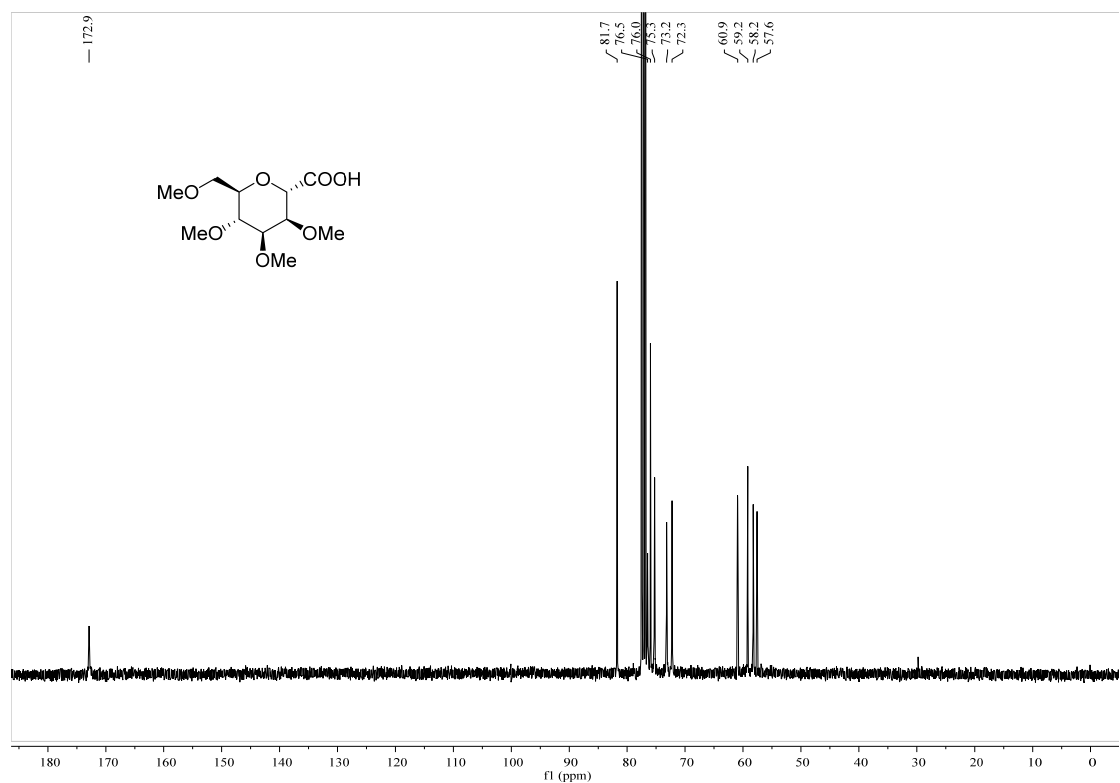

**<sup>1</sup>H NMR (400 MHz, CDCl<sub>3</sub>) of 12**

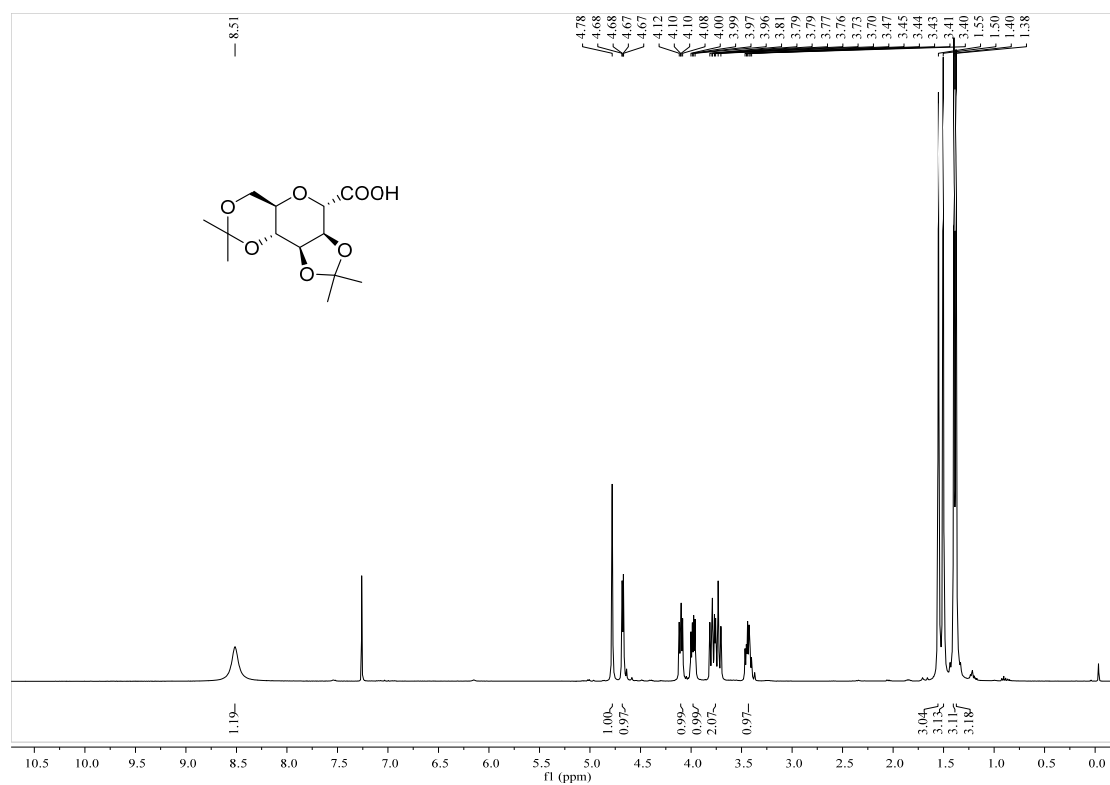

**<sup>13</sup>C NMR (100 MHz, CDCl<sub>3</sub>) of 12**

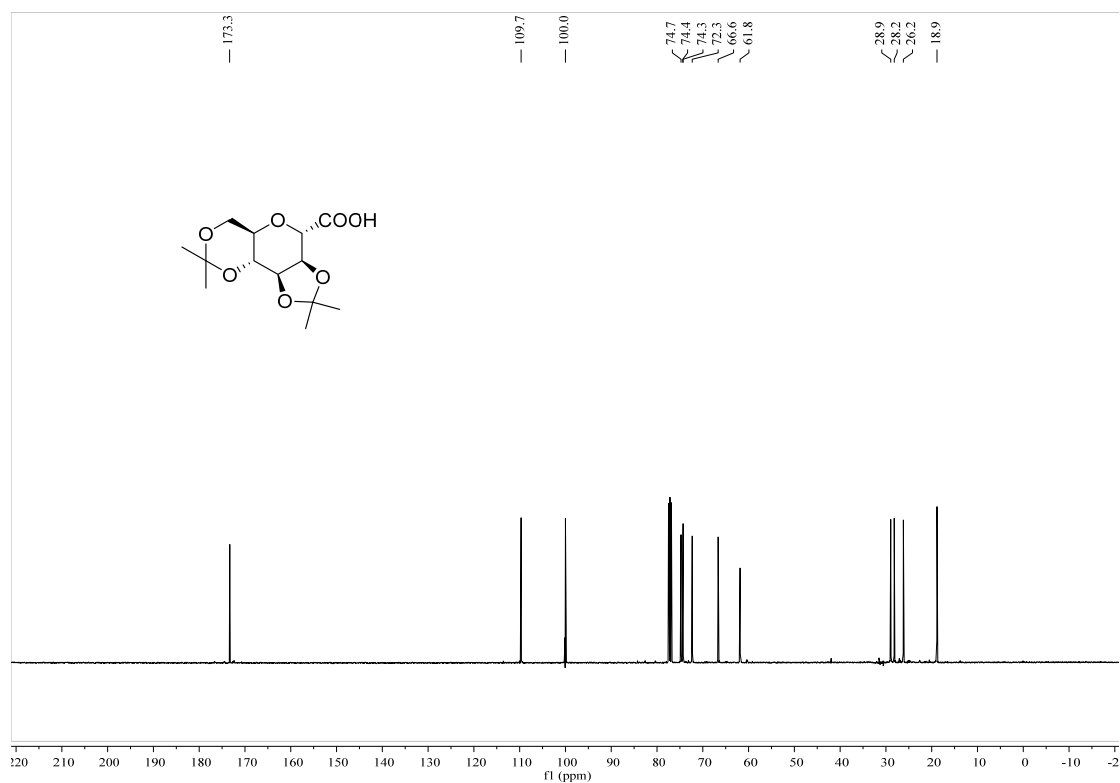

**<sup>1</sup>H NMR (400 MHz, CDCl<sub>3</sub>) of 13**

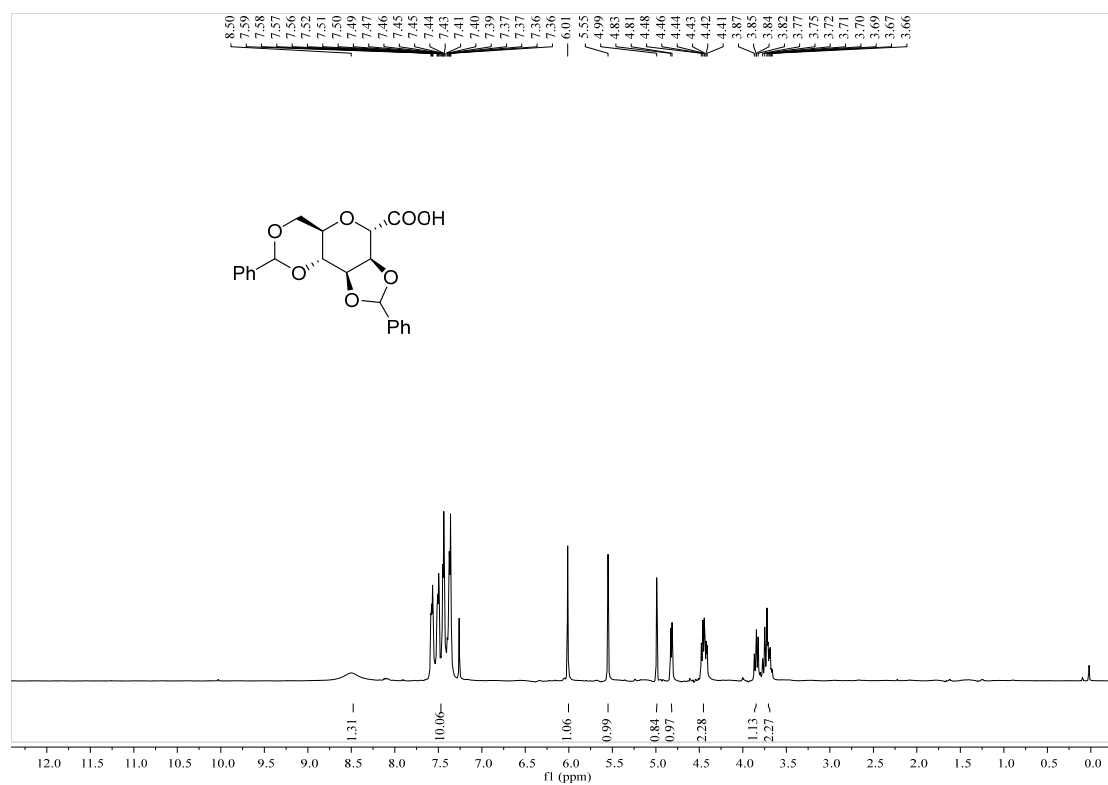

**<sup>13</sup>C NMR (100 MHz, CDCl<sub>3</sub>) of 13**

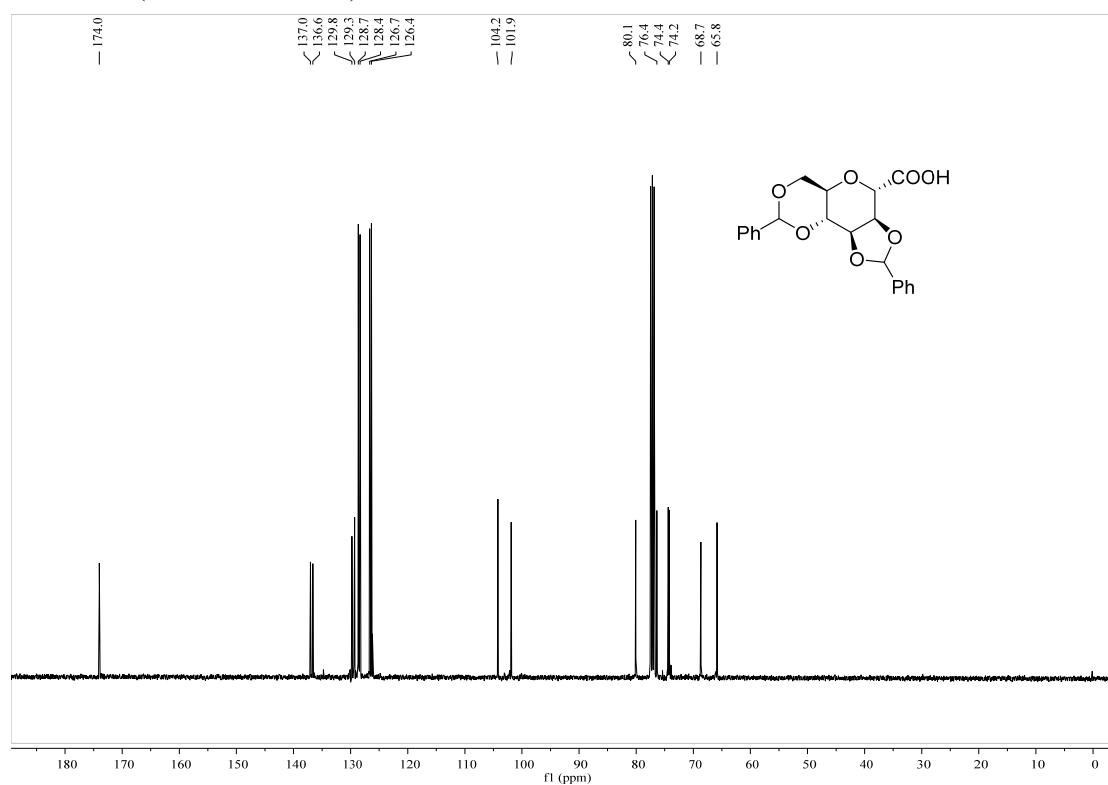

<sup>1</sup>H NMR (400 MHz, CDCl<sub>3</sub>) of 14

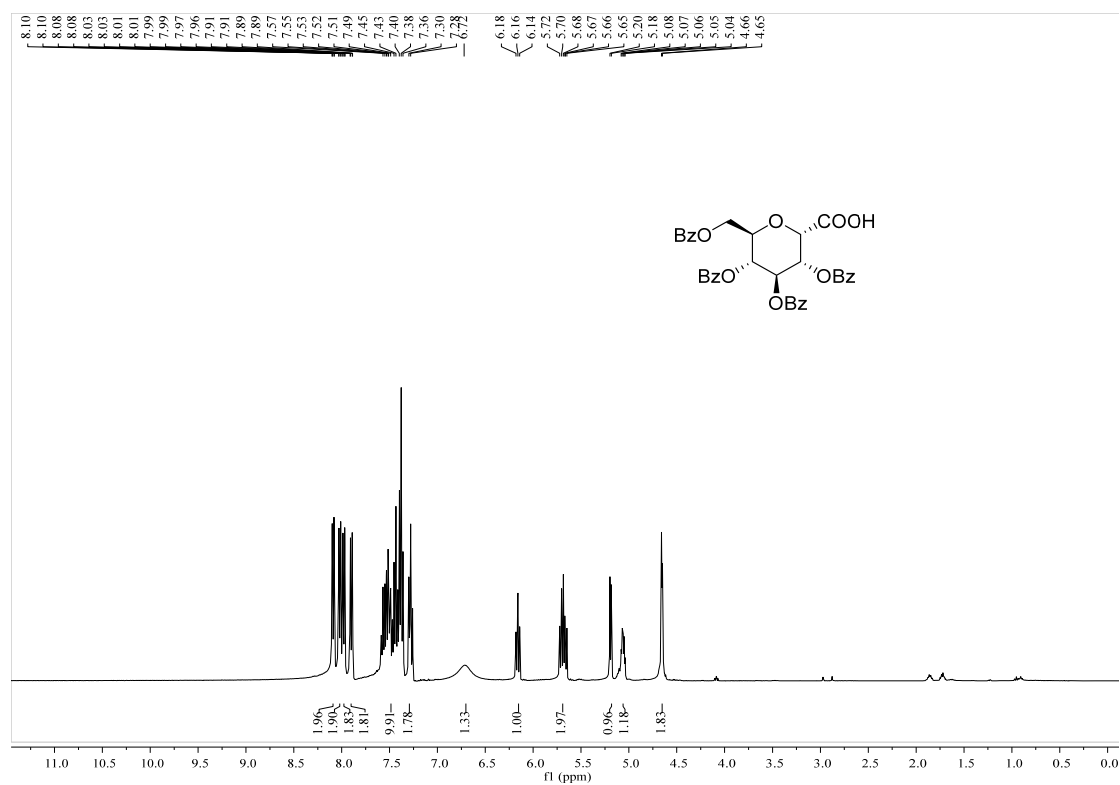

<sup>13</sup>C NMR (100 MHz, CDCl<sub>3</sub>) of 14

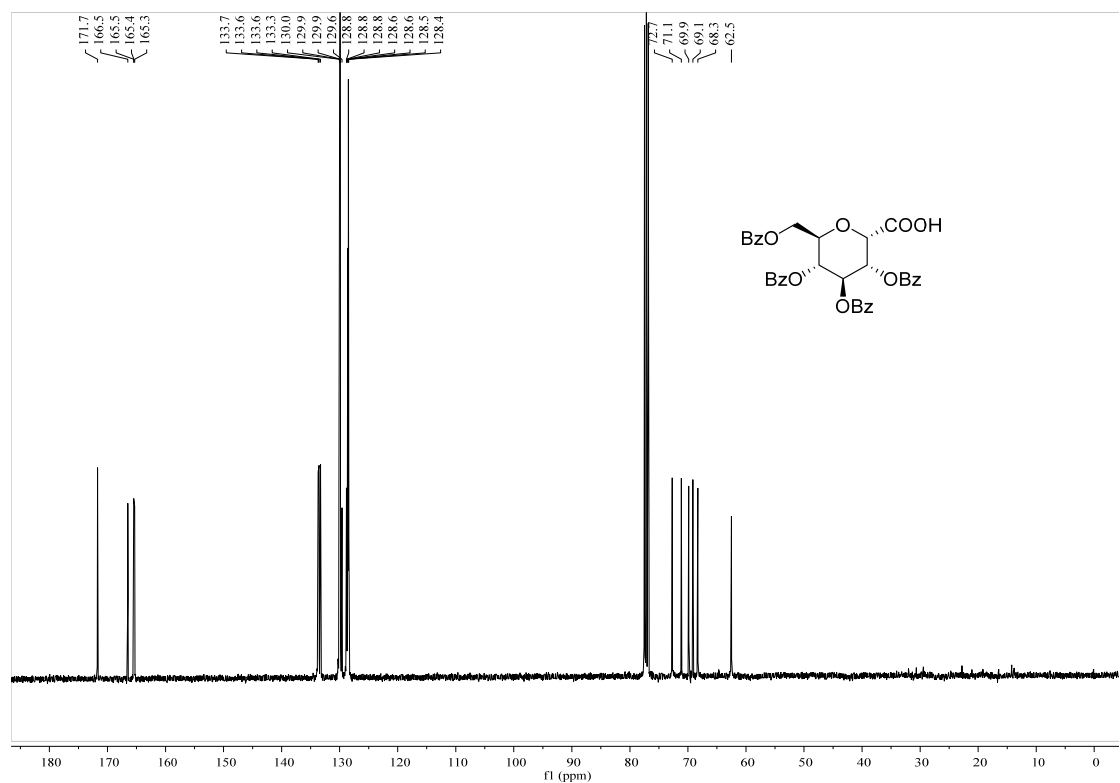

<sup>1</sup>H NMR (400 MHz, CDCl<sub>3</sub>) of 15

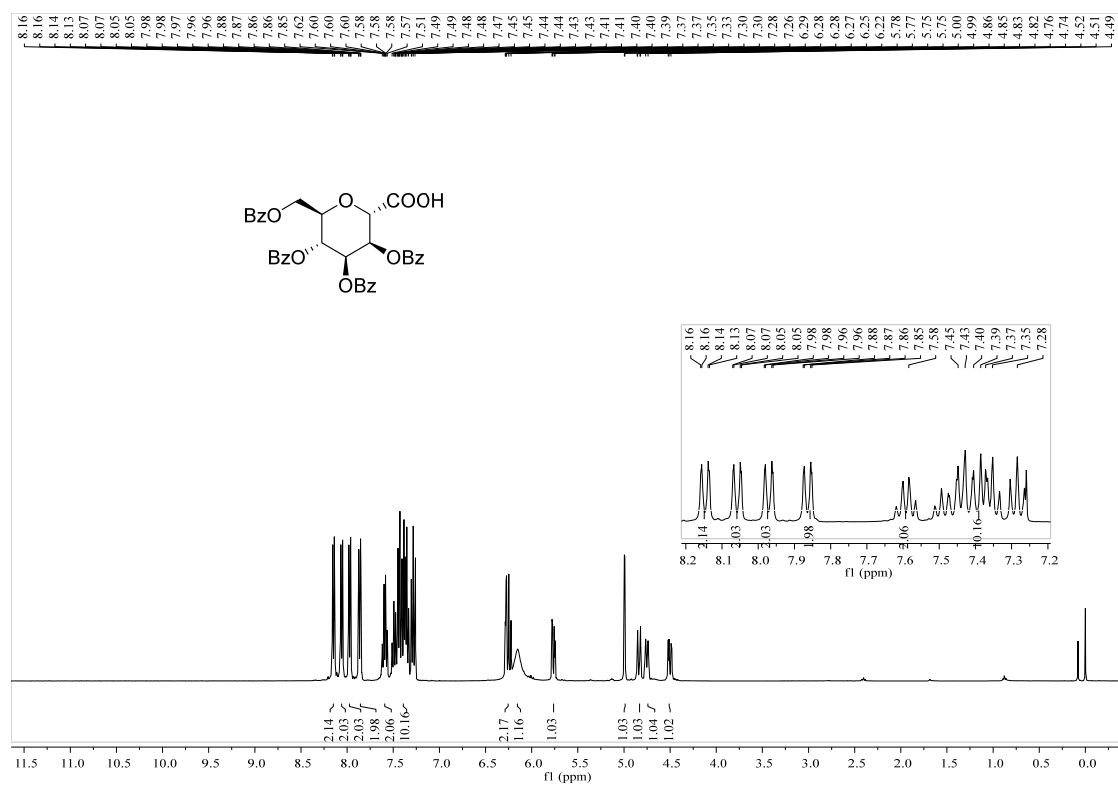

<sup>13</sup>C NMR (100 MHz, CDCl<sub>3</sub>) of 15

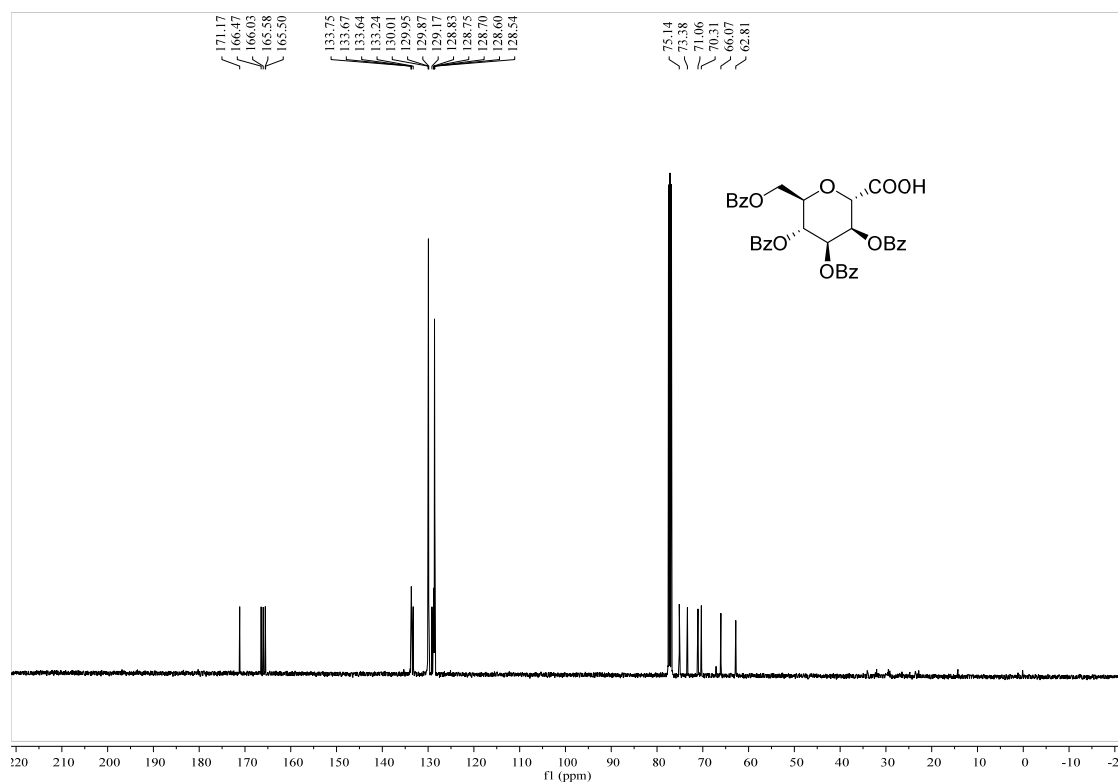

<sup>1</sup>H NMR (400 MHz, CDCl<sub>3</sub>) of **16**

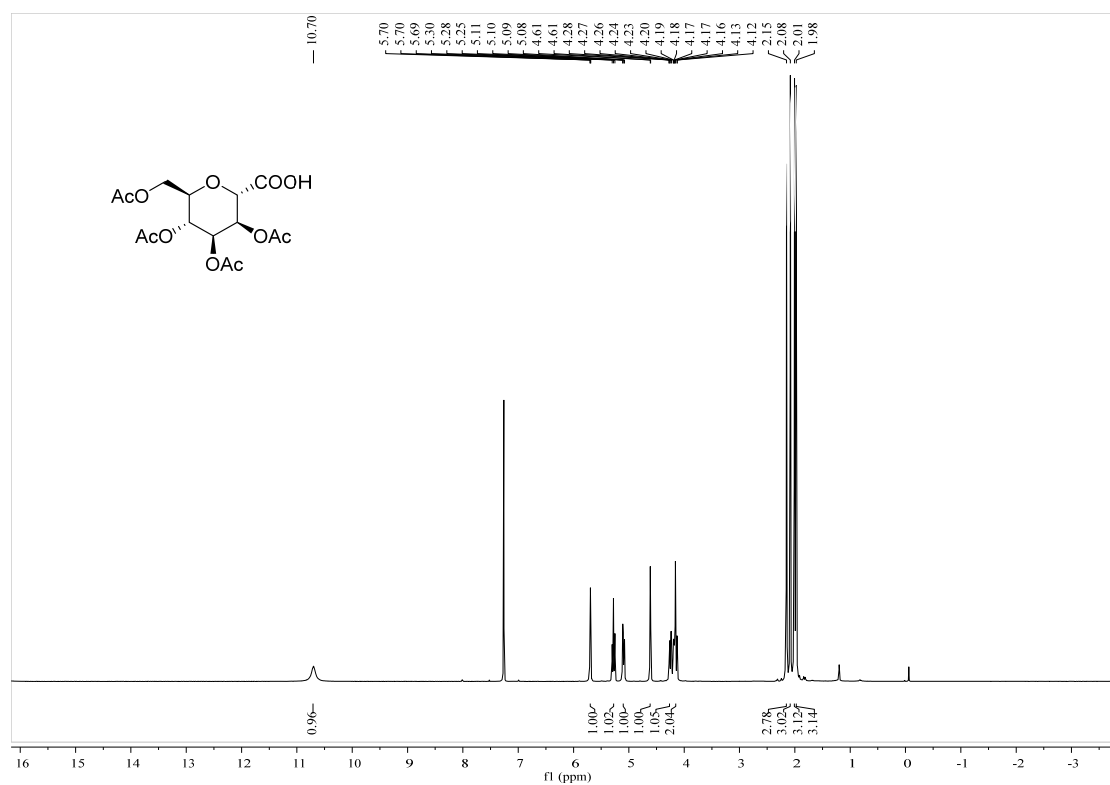

<sup>13</sup>C NMR (100 MHz, CDCl<sub>3</sub>) of **16**

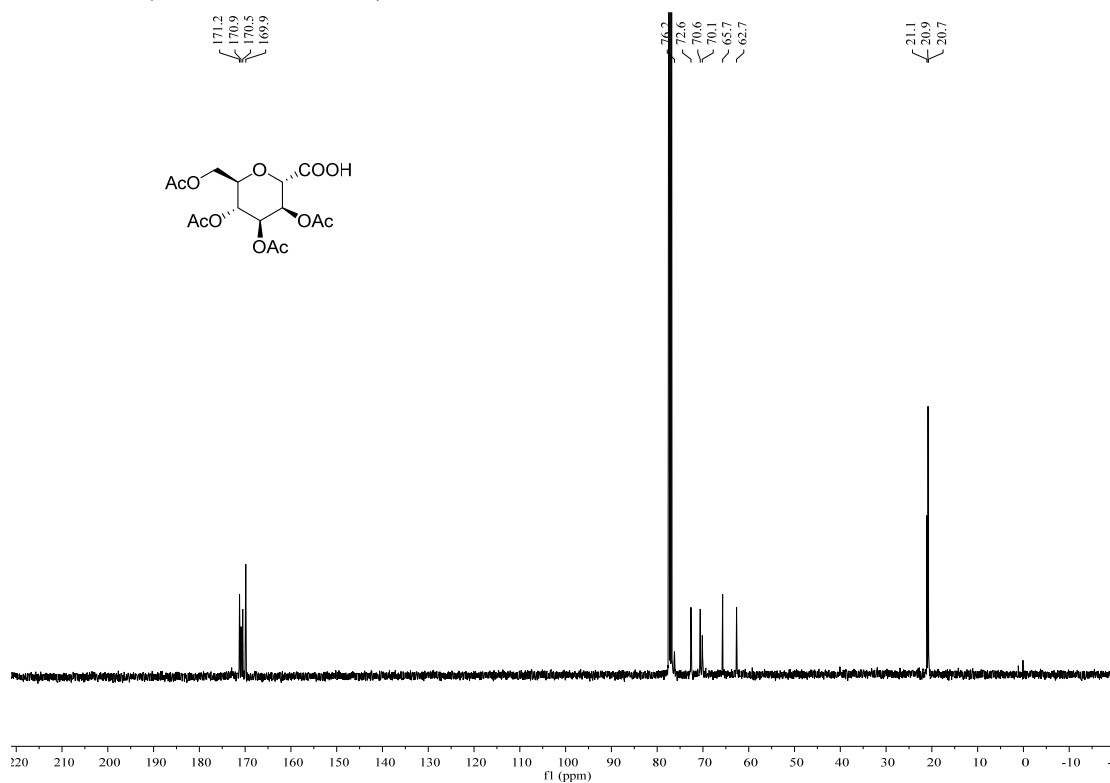

<sup>1</sup>H NMR (400 MHz, CDCl<sub>3</sub>) of **17**

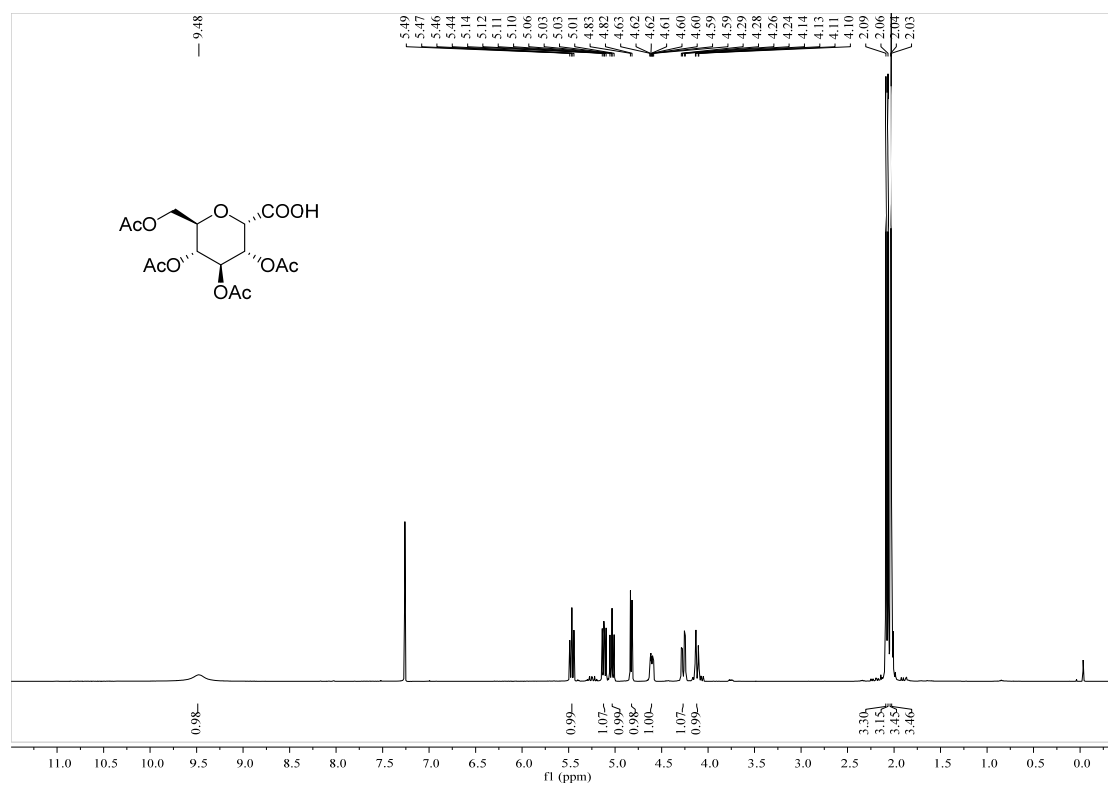

<sup>13</sup>C NMR (100 MHz, CDCl<sub>3</sub>) of **17**

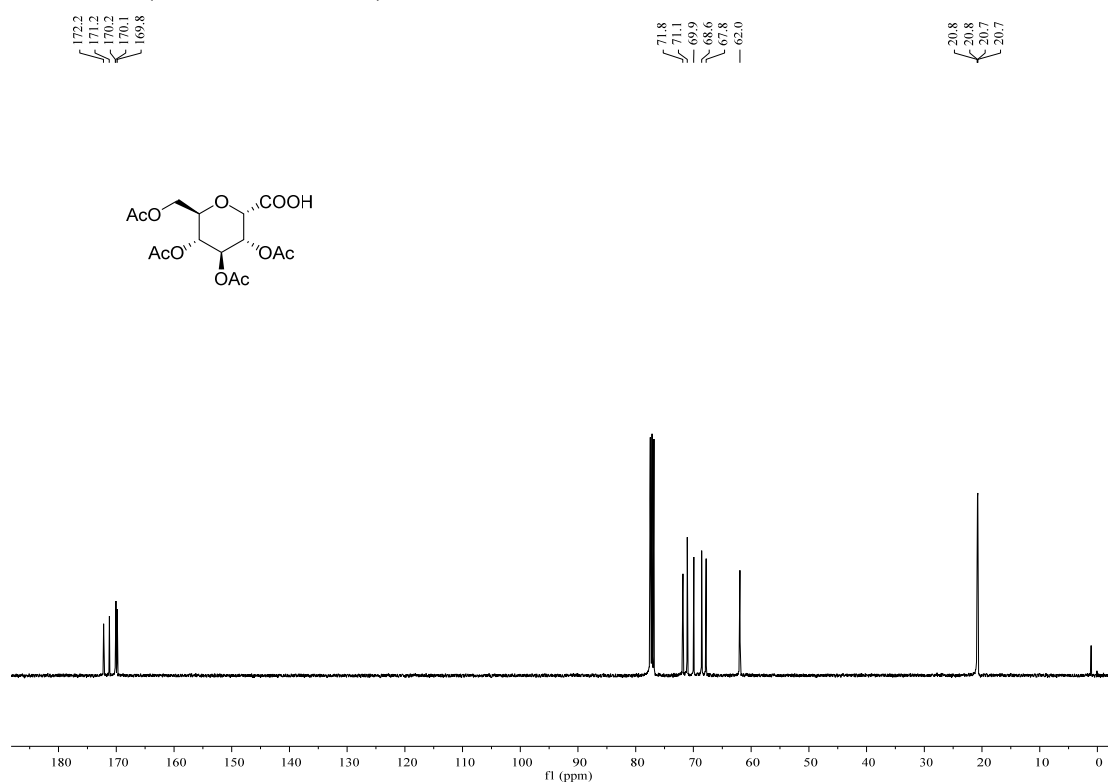

**<sup>1</sup>H NMR (400 MHz, CDCl<sub>3</sub>) of 18**

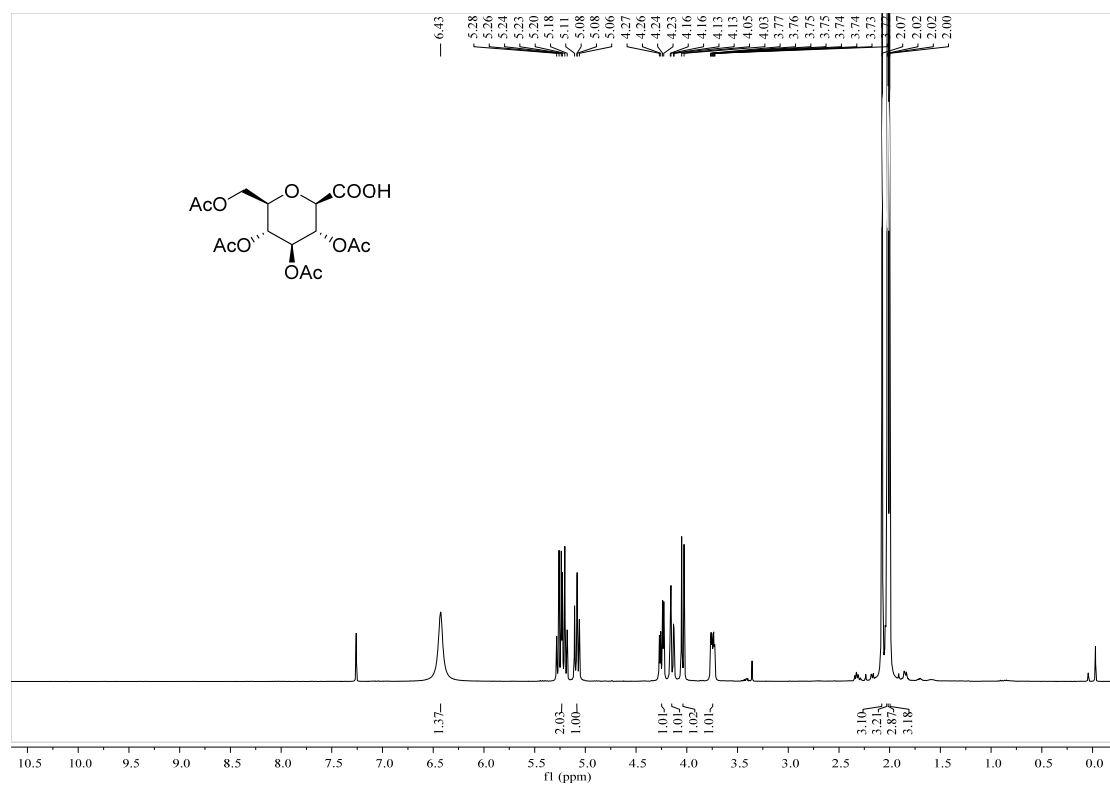

**<sup>13</sup>C NMR (100 MHz, CDCl<sub>3</sub>) of 18**

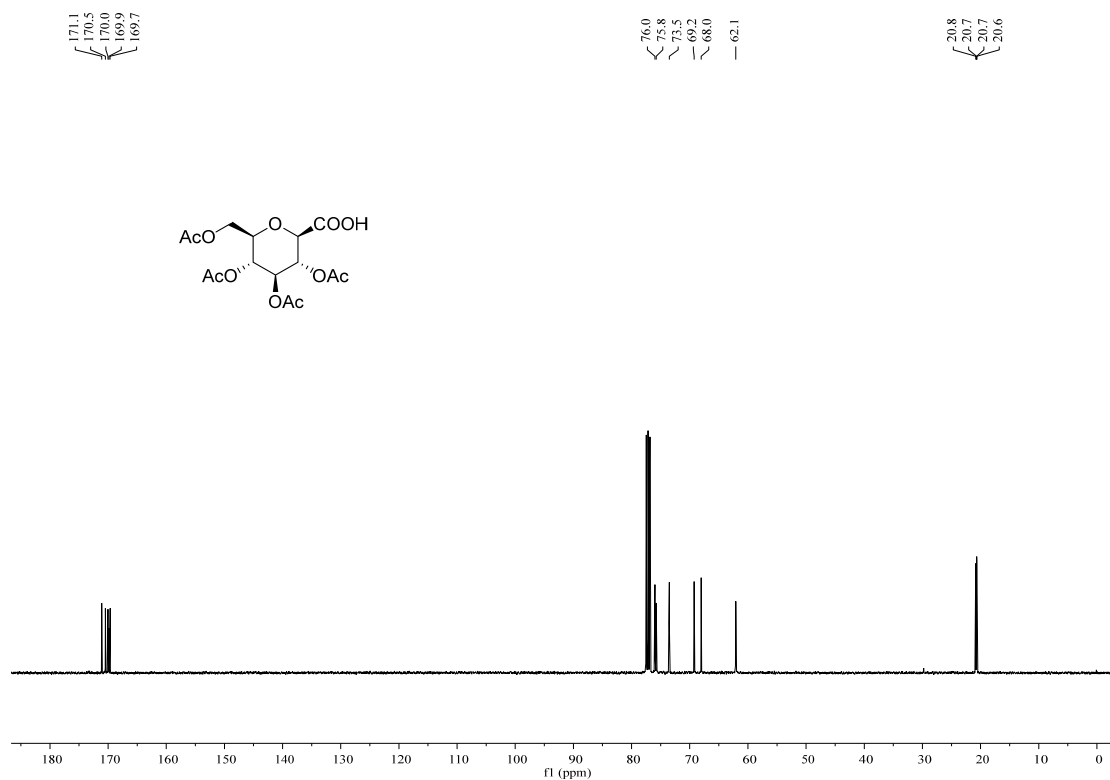



**<sup>1</sup>H NMR (400 MHz, CDCl<sub>3</sub>) of 19**

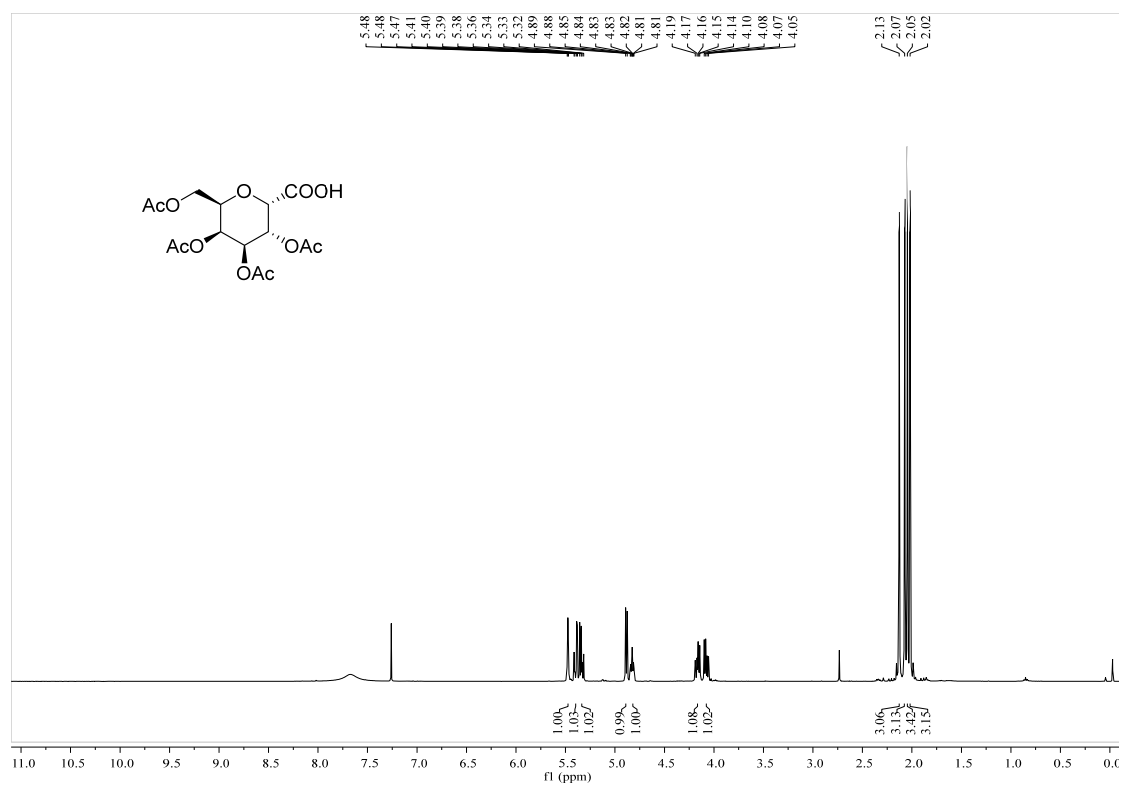

**<sup>13</sup>C NMR (100 MHz, CDCl<sub>3</sub>) of 19**

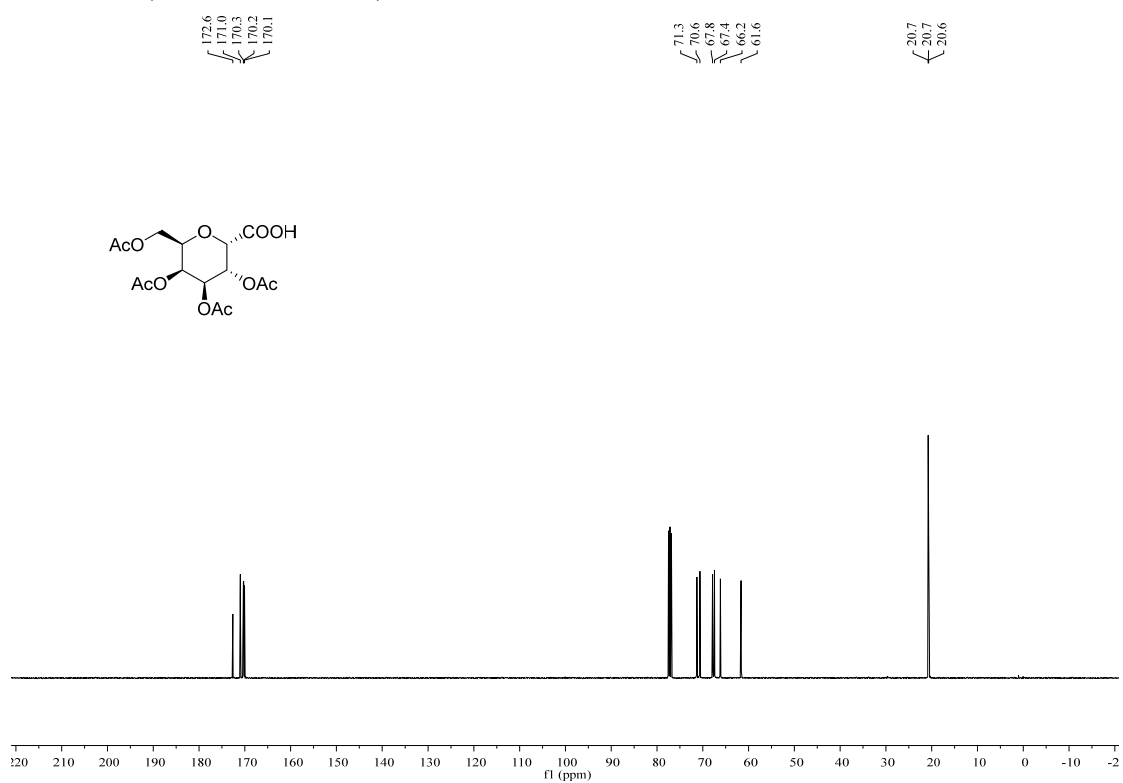

**<sup>1</sup>H NMR (400 MHz, CDCl<sub>3</sub>) of 20**

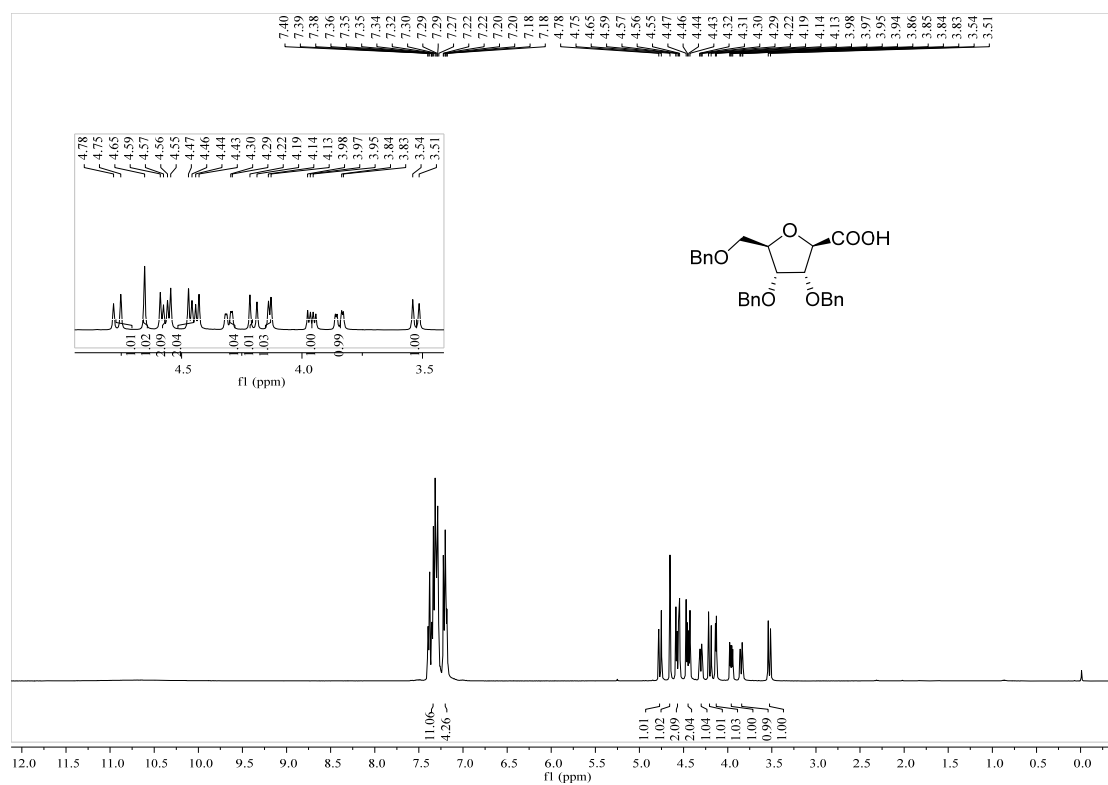

**<sup>13</sup>C NMR (100 MHz, CDCl<sub>3</sub>) of 20**

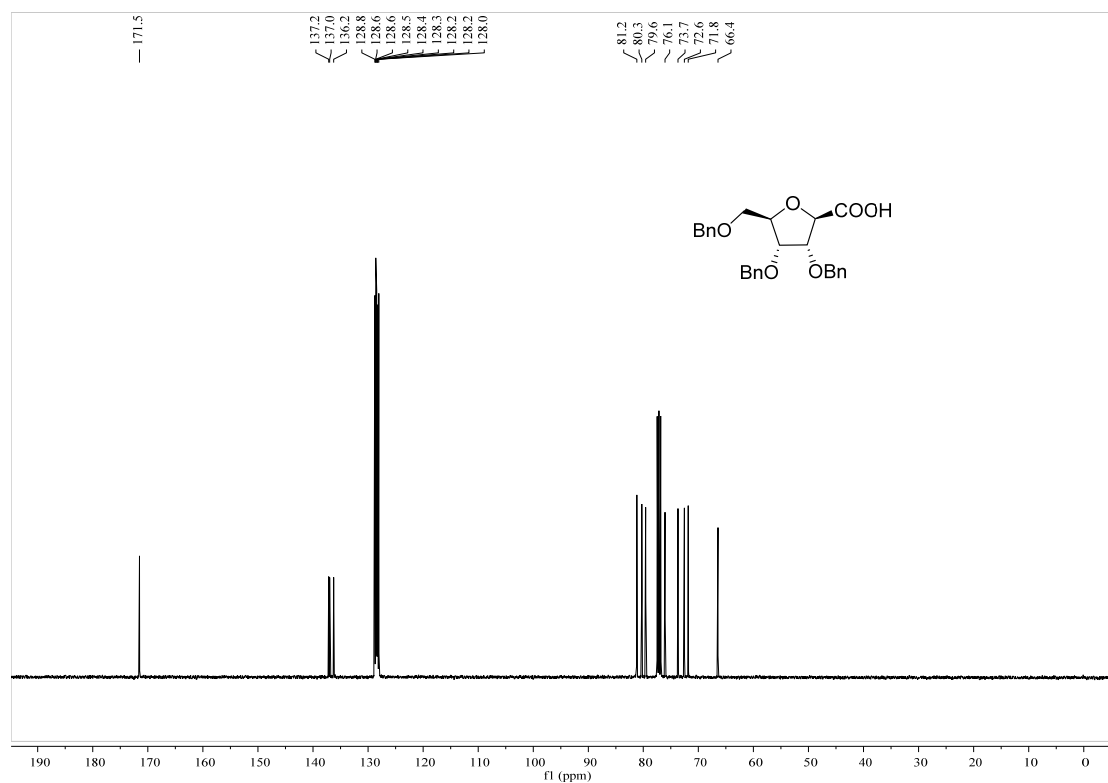

<sup>1</sup>H NMR (400 MHz, CDCl<sub>3</sub>) of **21**

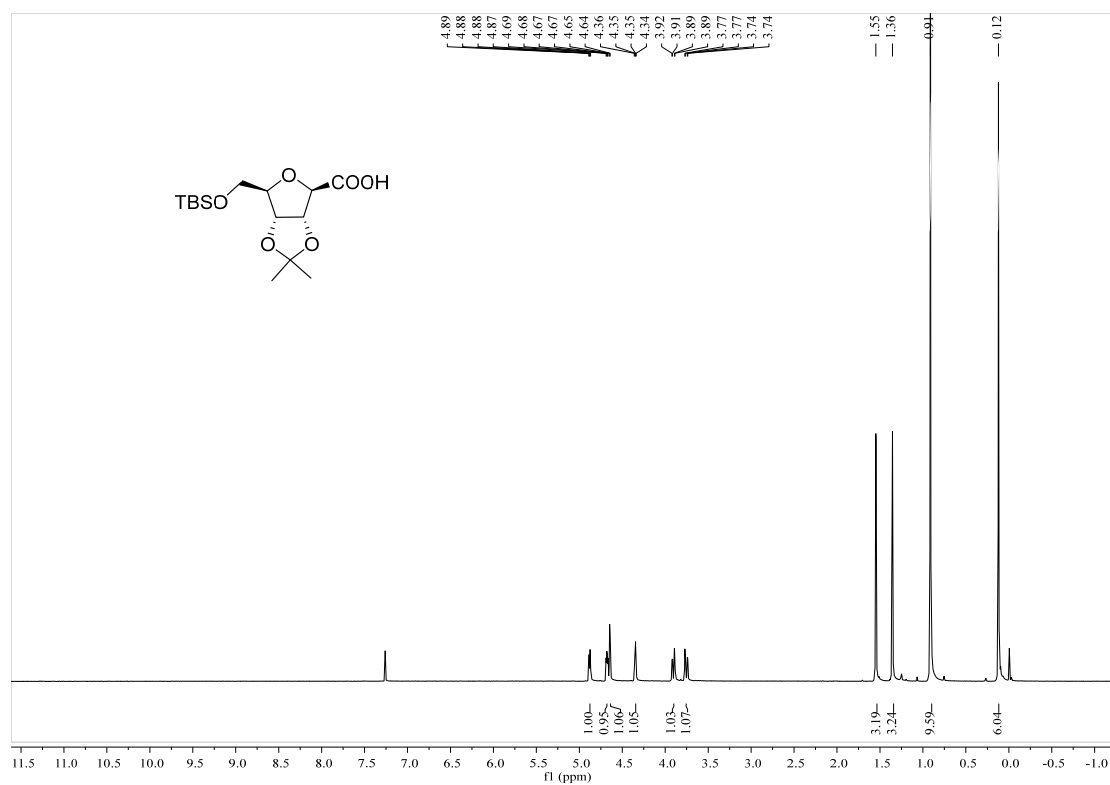

<sup>13</sup>C NMR (100 MHz, CDCl<sub>3</sub>) of **21**

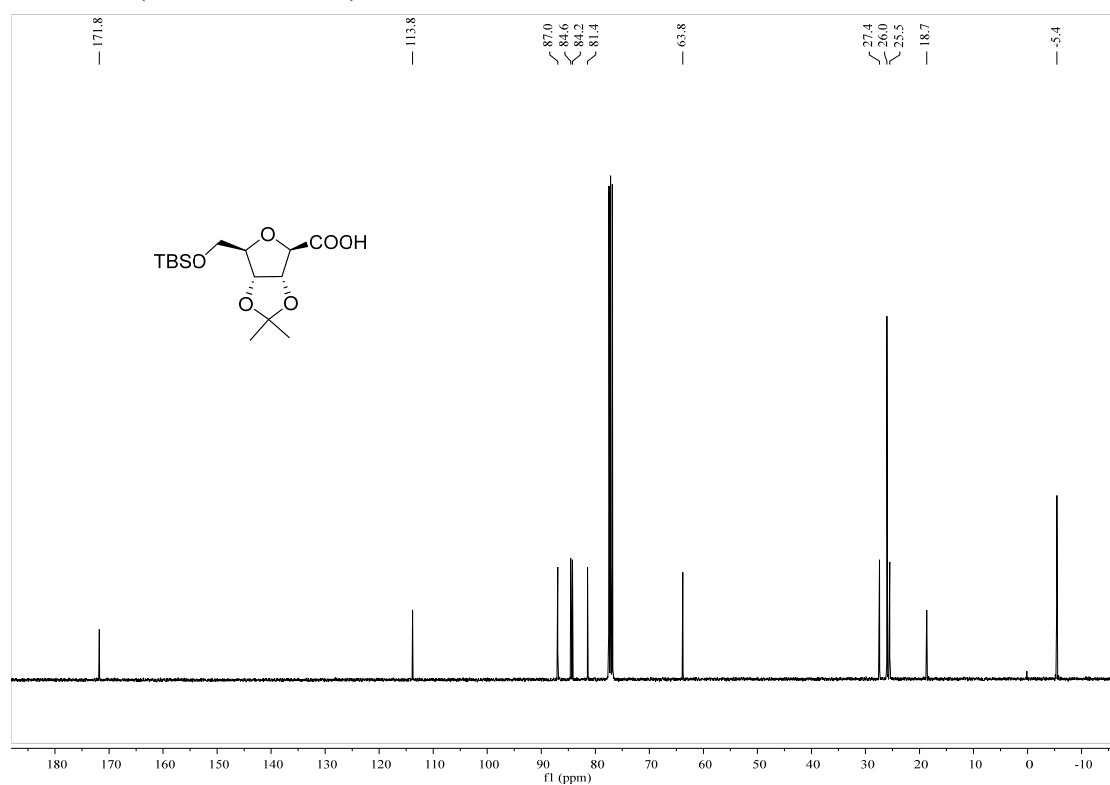

<sup>1</sup>H NMR (400 MHz, CDCl<sub>3</sub>) of **22**

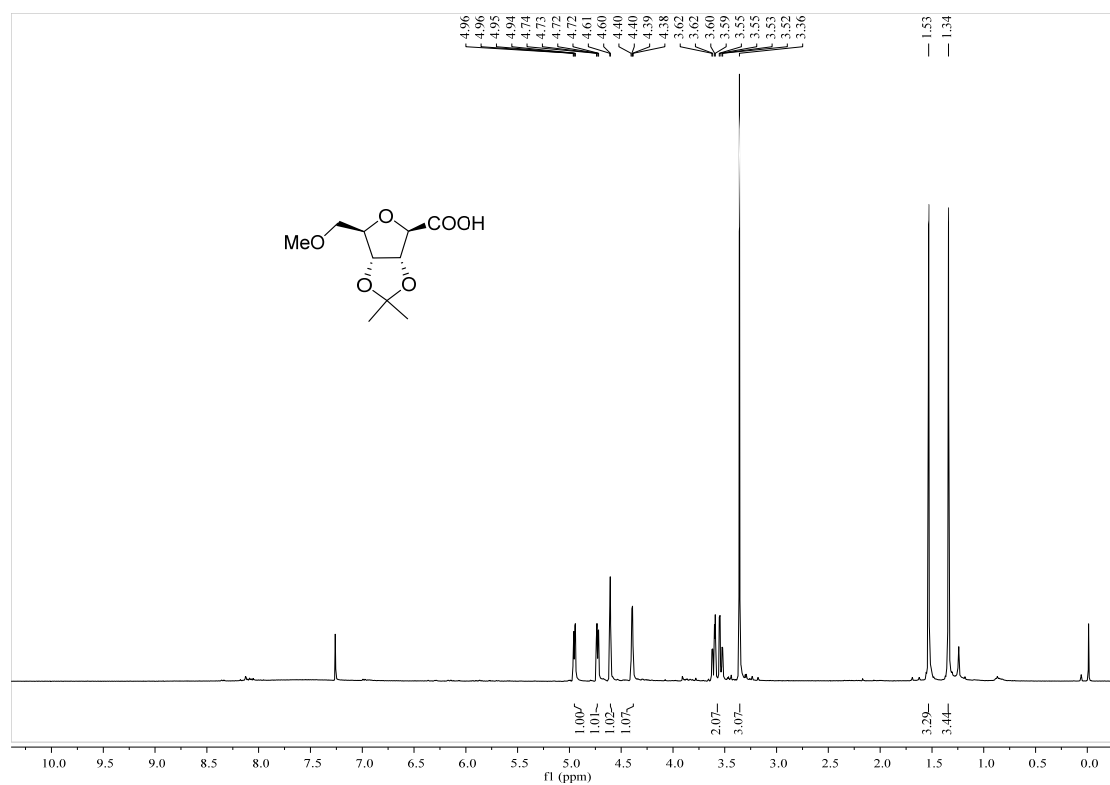

<sup>13</sup>C NMR (100 MHz, CDCl<sub>3</sub>) of **22**

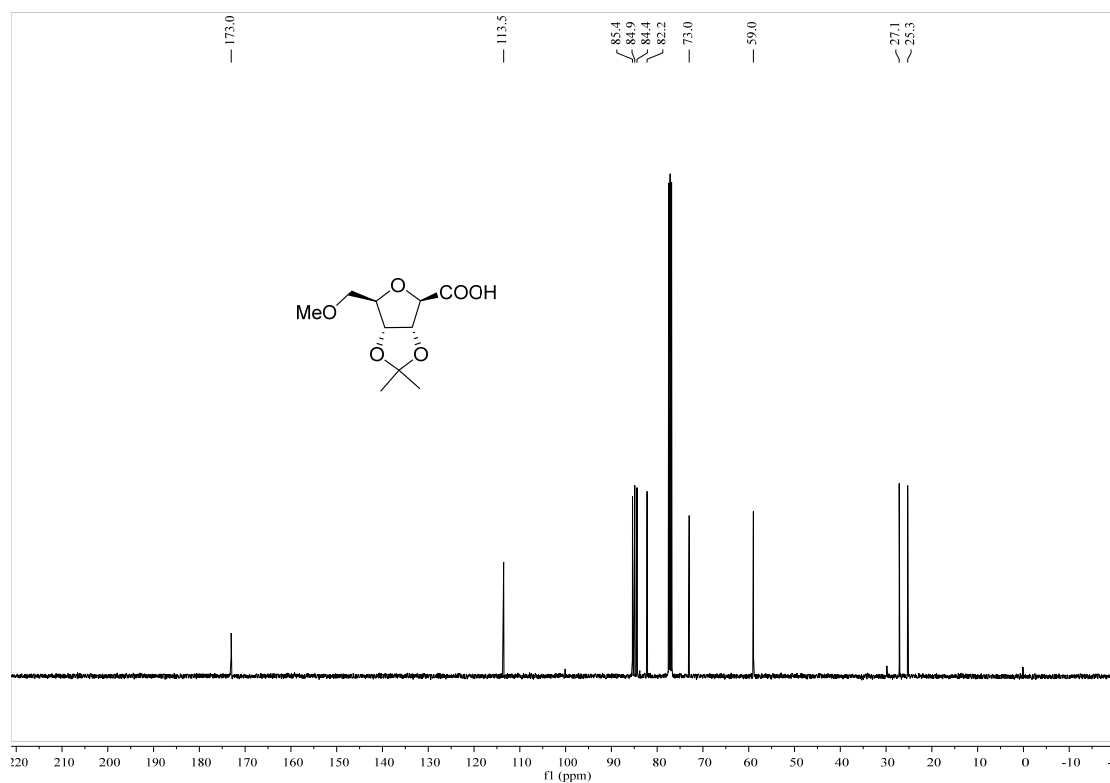

**<sup>1</sup>H NMR (400 MHz, CDCl<sub>3</sub>) of 23**

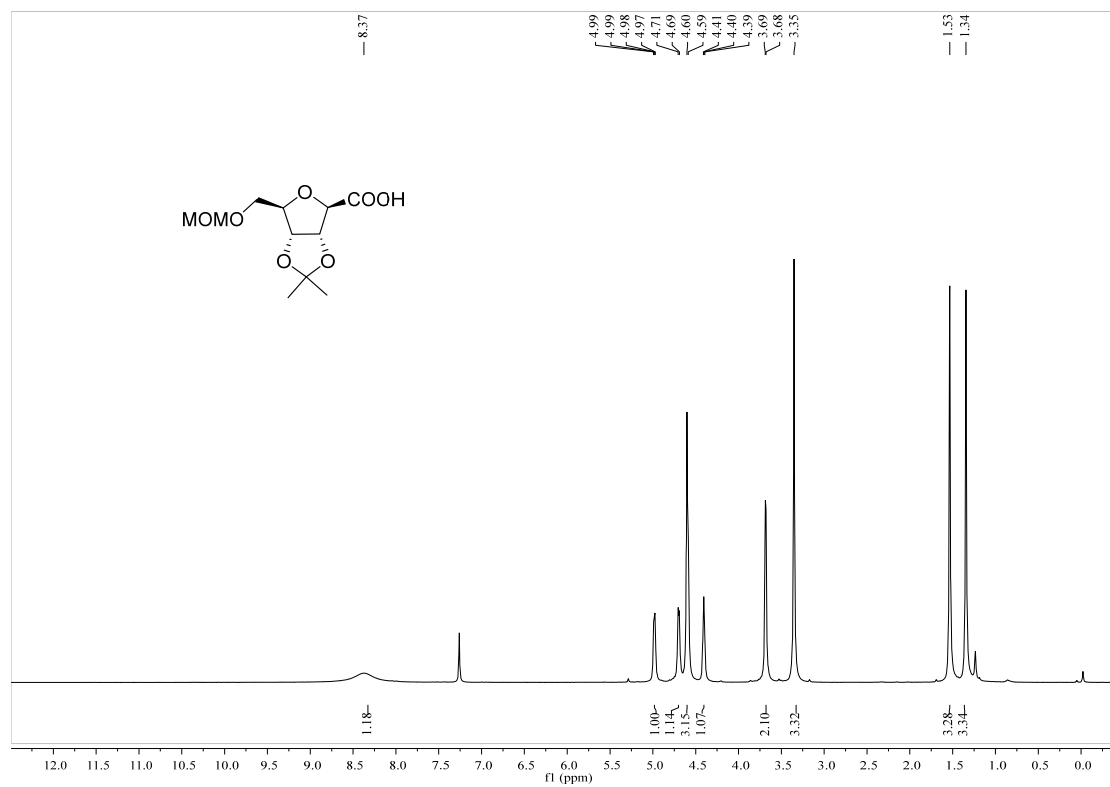

**<sup>13</sup>C NMR (100 MHz, CDCl<sub>3</sub>) of 23**

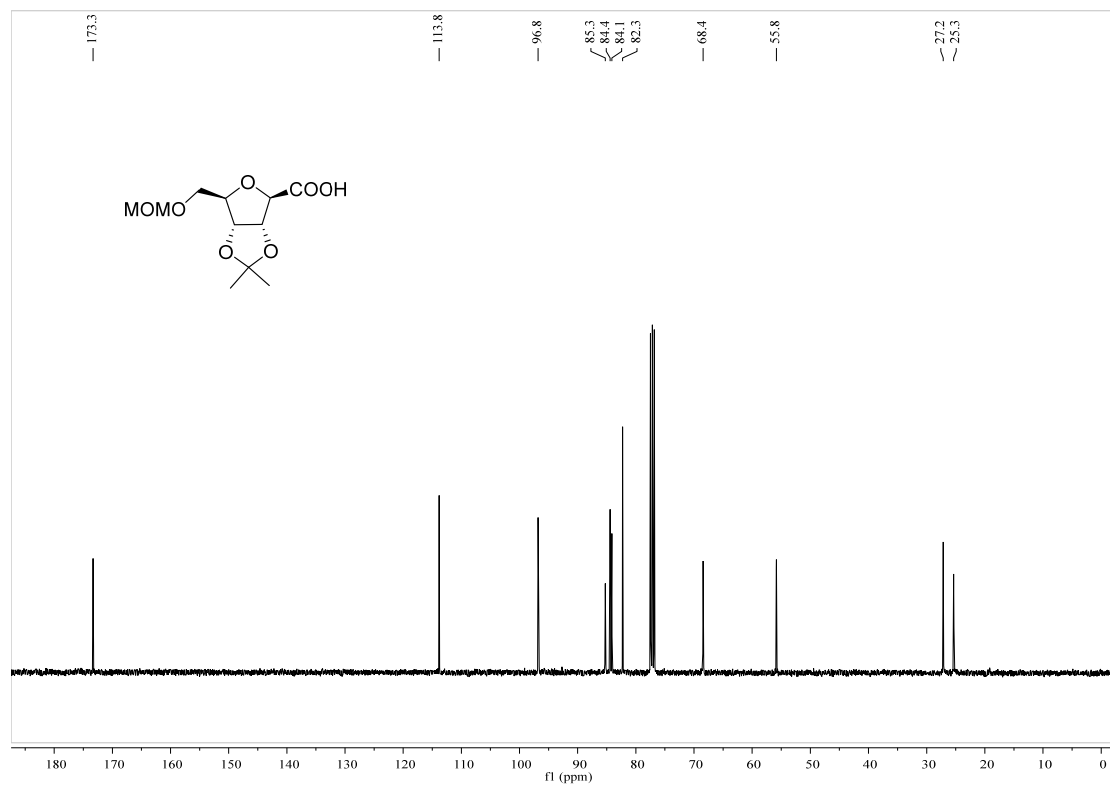

**<sup>1</sup>H NMR (400 MHz, CDCl<sub>3</sub>) of 24**

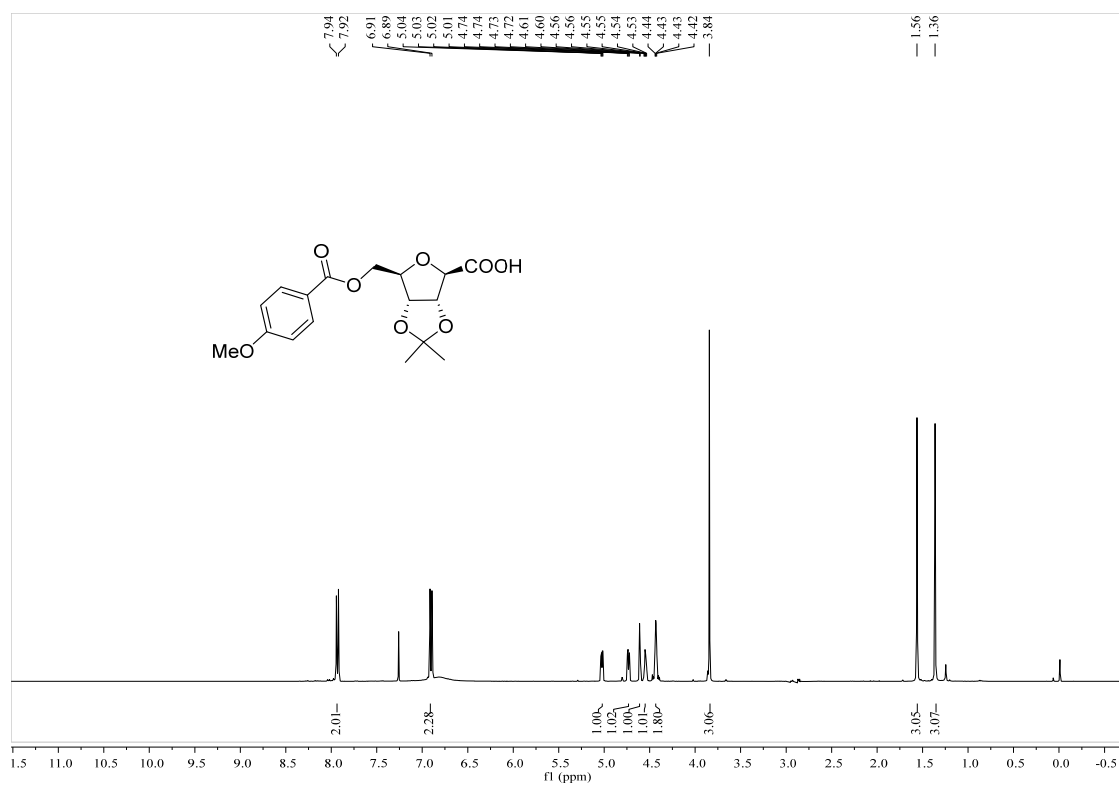

**<sup>13</sup>C NMR (100 MHz, CDCl<sub>3</sub>) of 24**

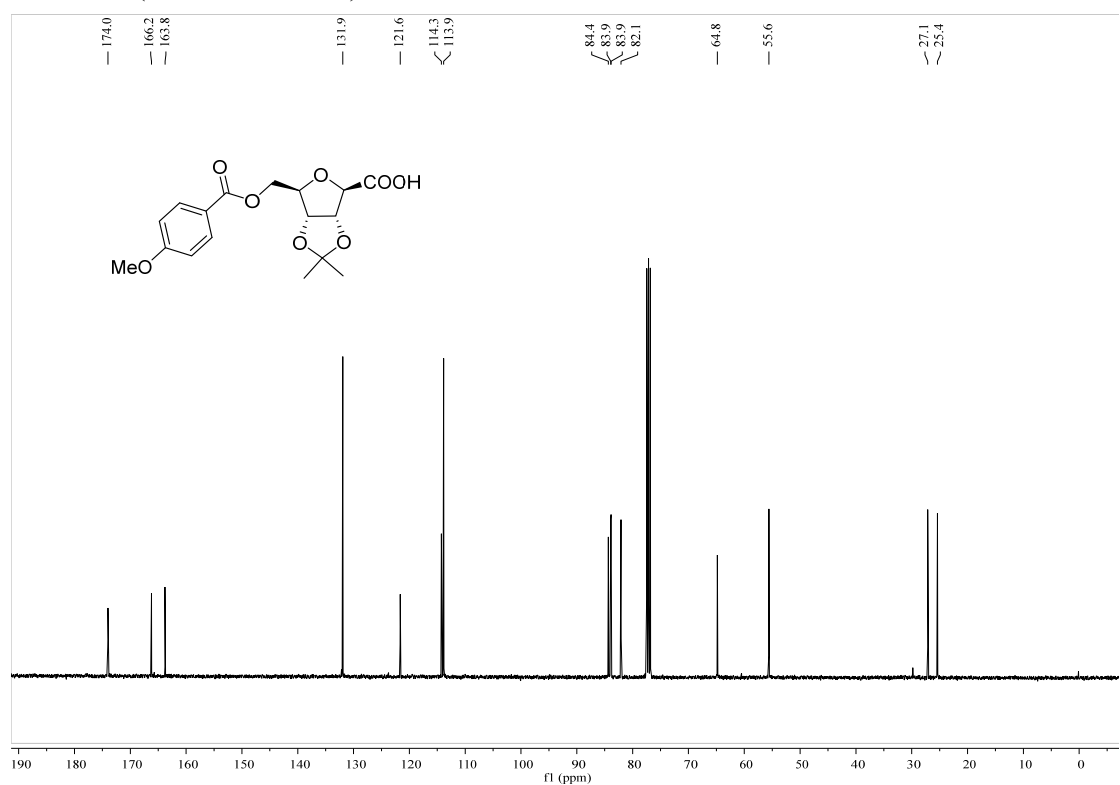

**<sup>1</sup>H NMR (400 MHz, CDCl<sub>3</sub>) of 25**

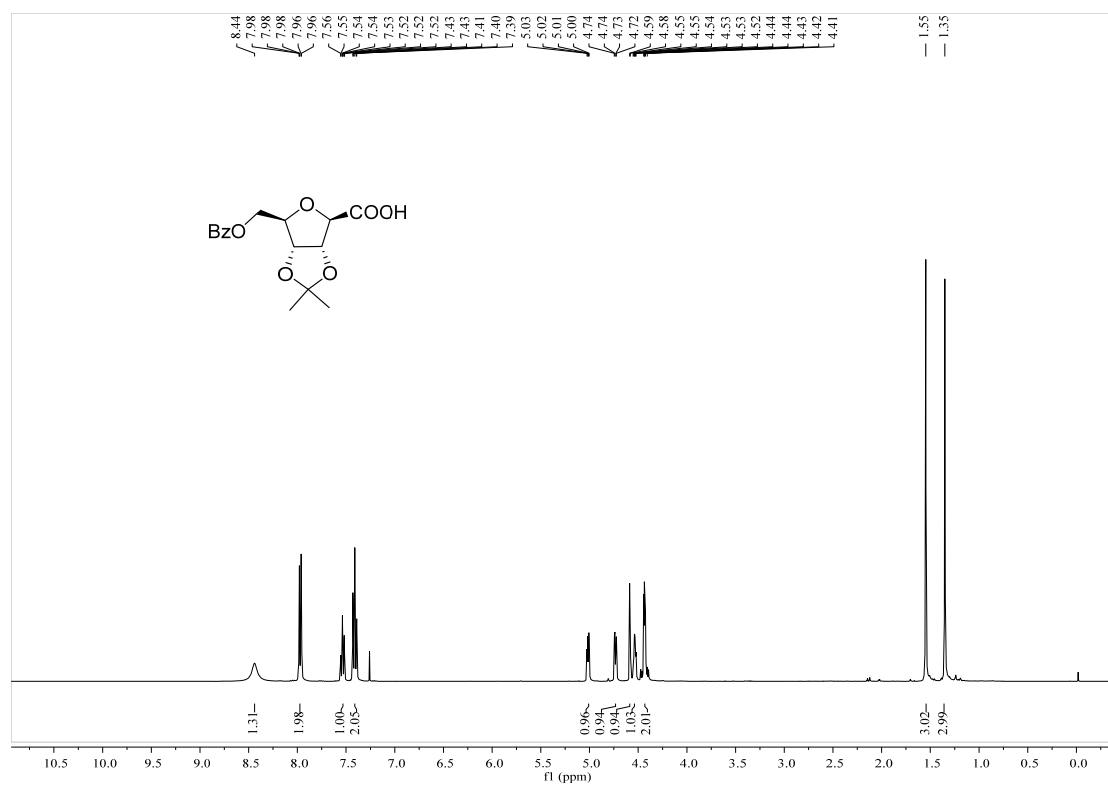

**<sup>13</sup>C NMR (100 MHz, CDCl<sub>3</sub>) of 25**

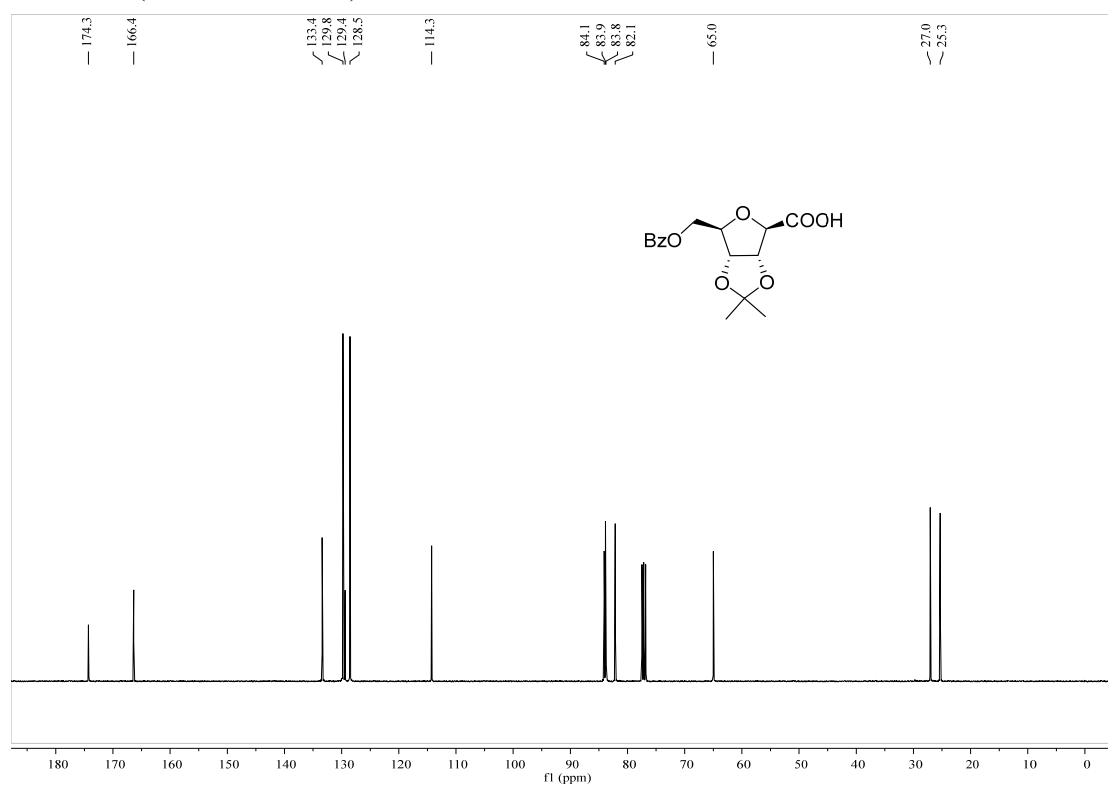

**<sup>1</sup>H NMR (400 MHz, CDCl<sub>3</sub>) of 26**

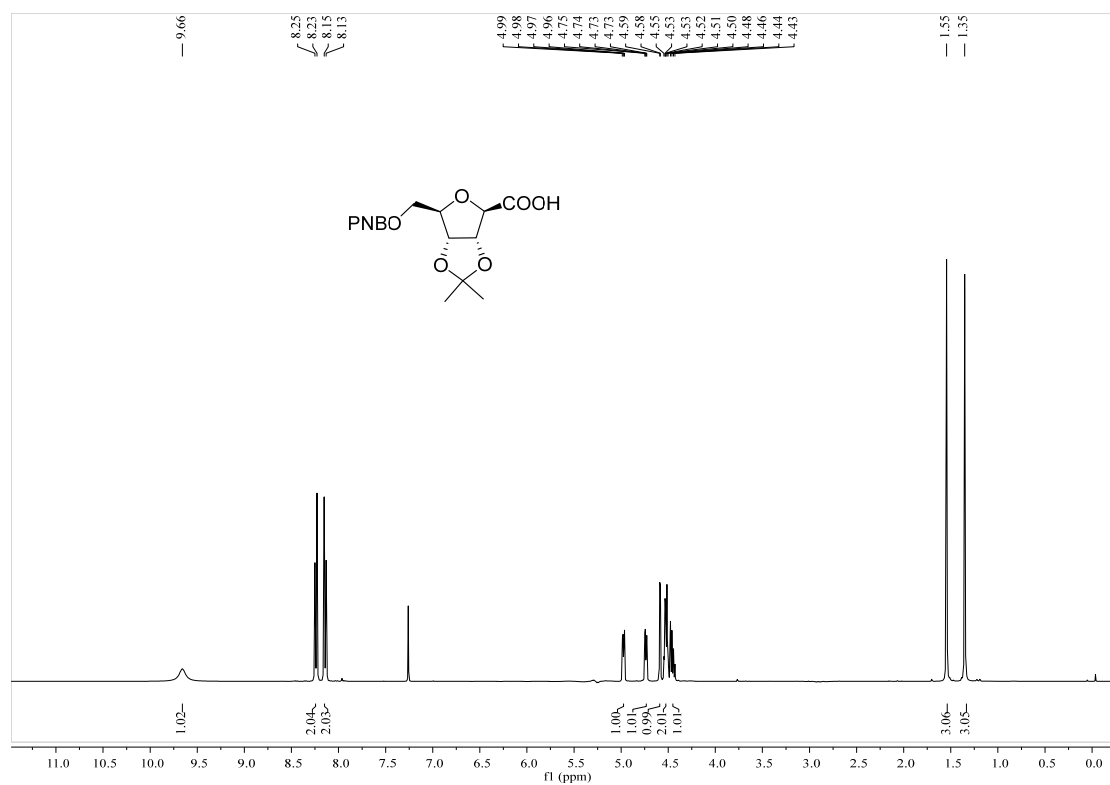

**<sup>13</sup>C NMR (100 MHz, CDCl<sub>3</sub>) of 26**

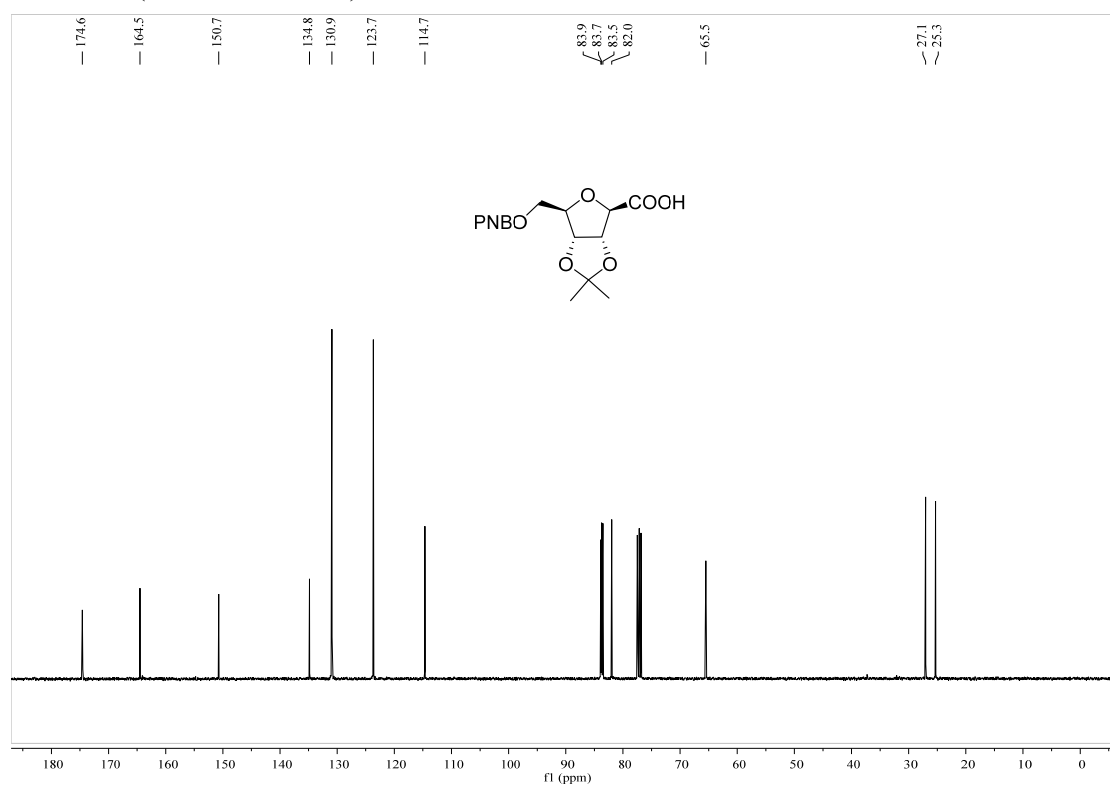



**<sup>1</sup>H NMR (400 MHz, CDCl<sub>3</sub>) of 27**

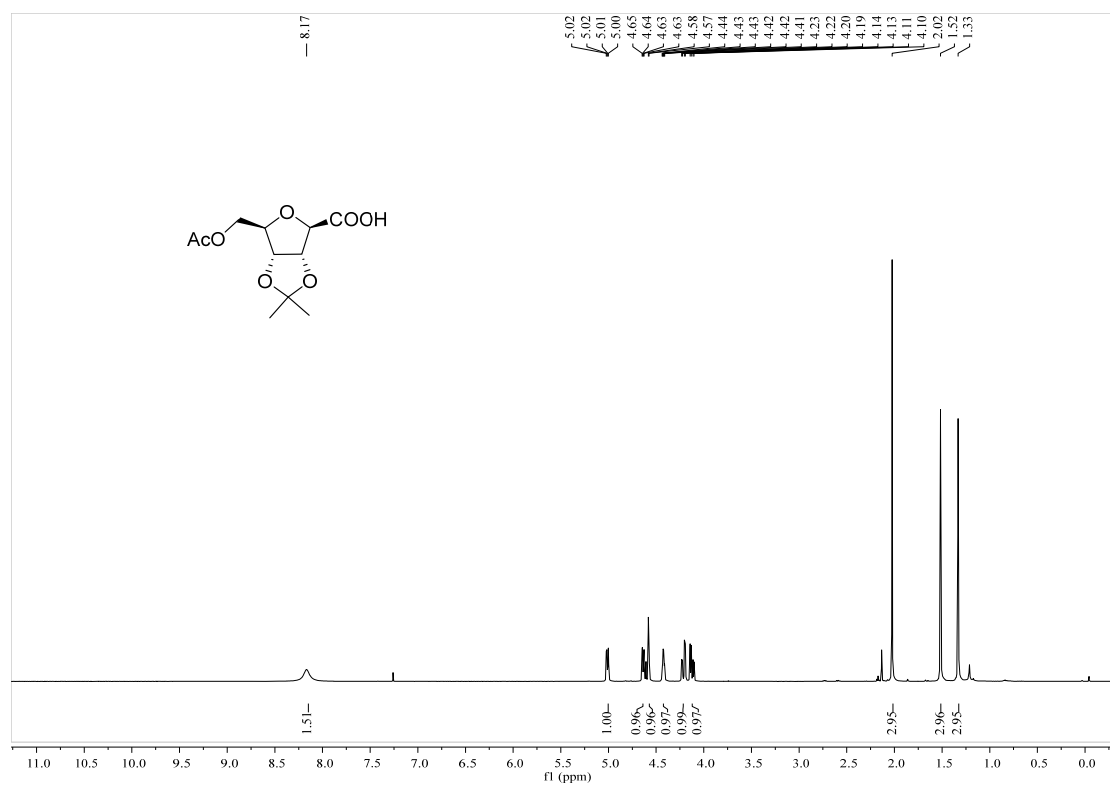

**<sup>13</sup>C NMR (100 MHz, CDCl<sub>3</sub>) of 27**

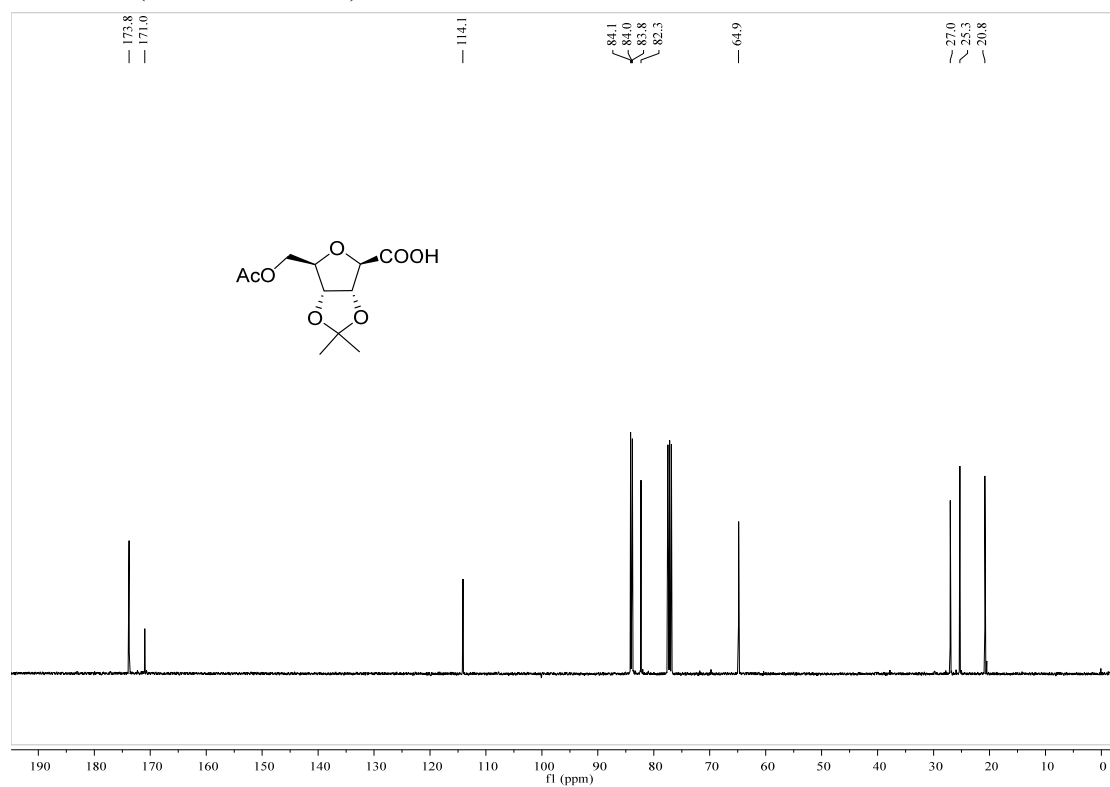

**<sup>1</sup>H NMR (400 MHz, CDCl<sub>3</sub>) of 28**

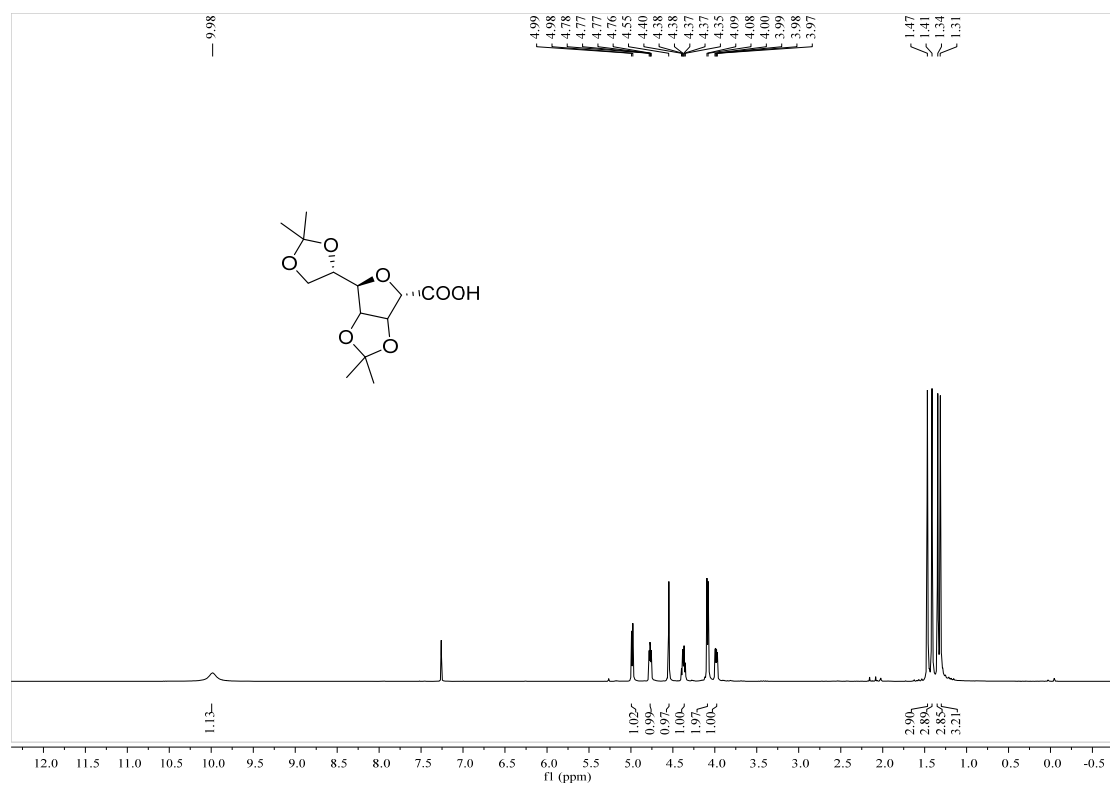

**<sup>13</sup>C NMR (100 MHz, CDCl<sub>3</sub>) of 28**

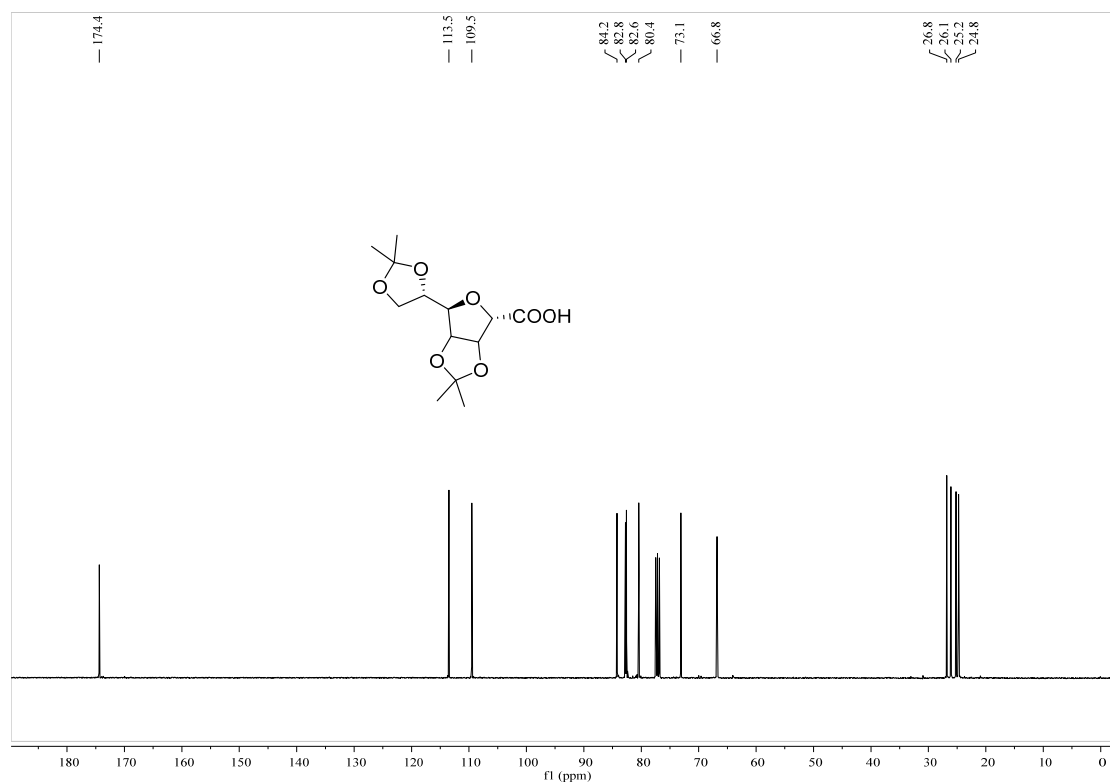

$^1\text{H}$  NMR (400 MHz,  $\text{CDCl}_3$ ) of **29**

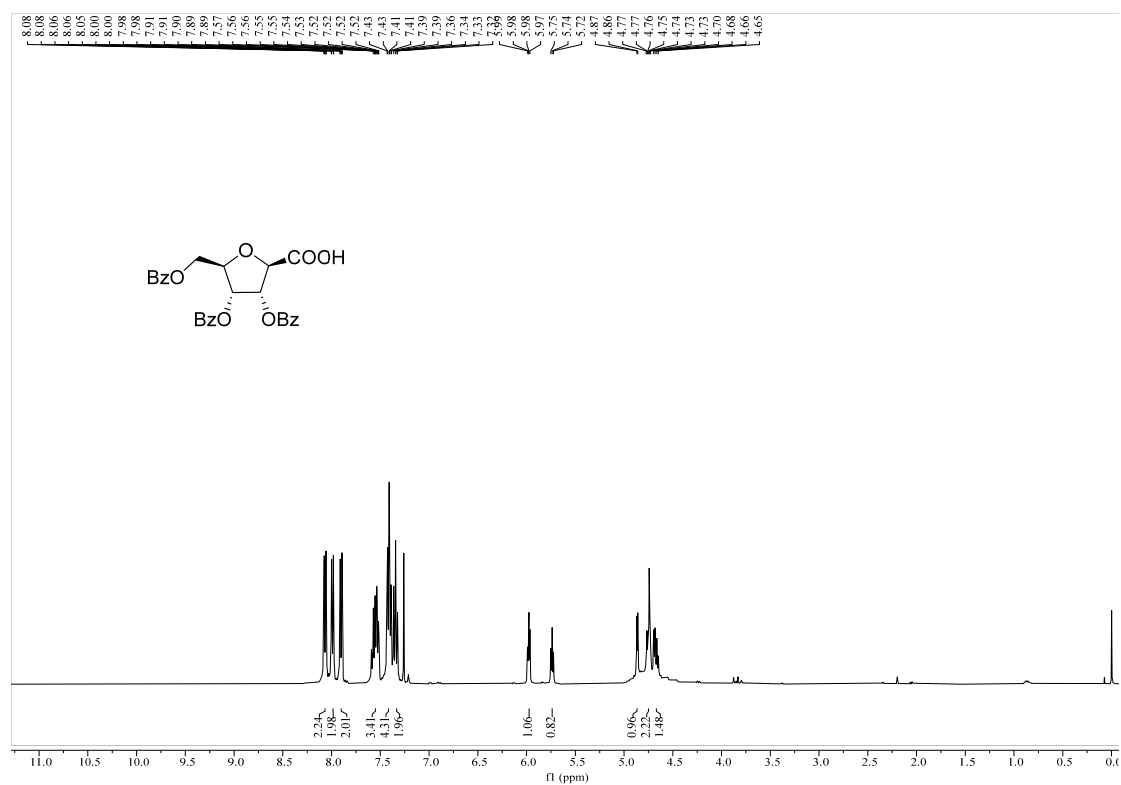

$^{13}\text{C}$  NMR (100 MHz,  $\text{CDCl}_3$ ) of **29**

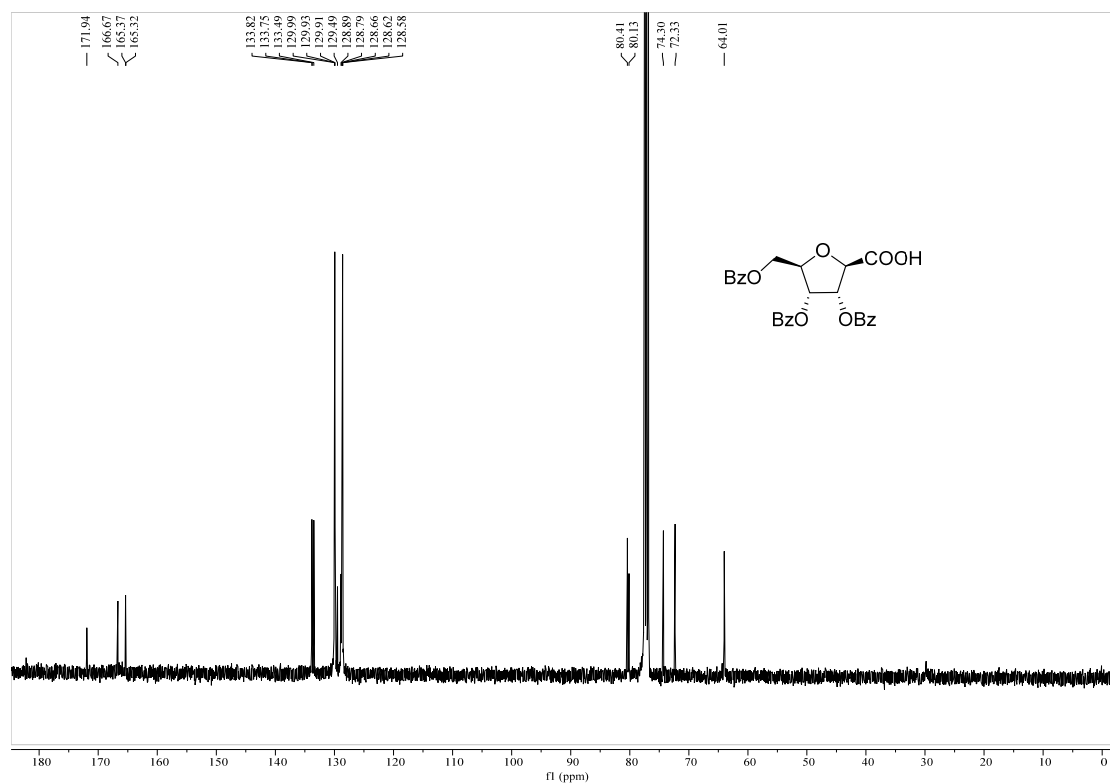

**<sup>1</sup>H NMR (400 MHz, CDCl<sub>3</sub>) of 31**

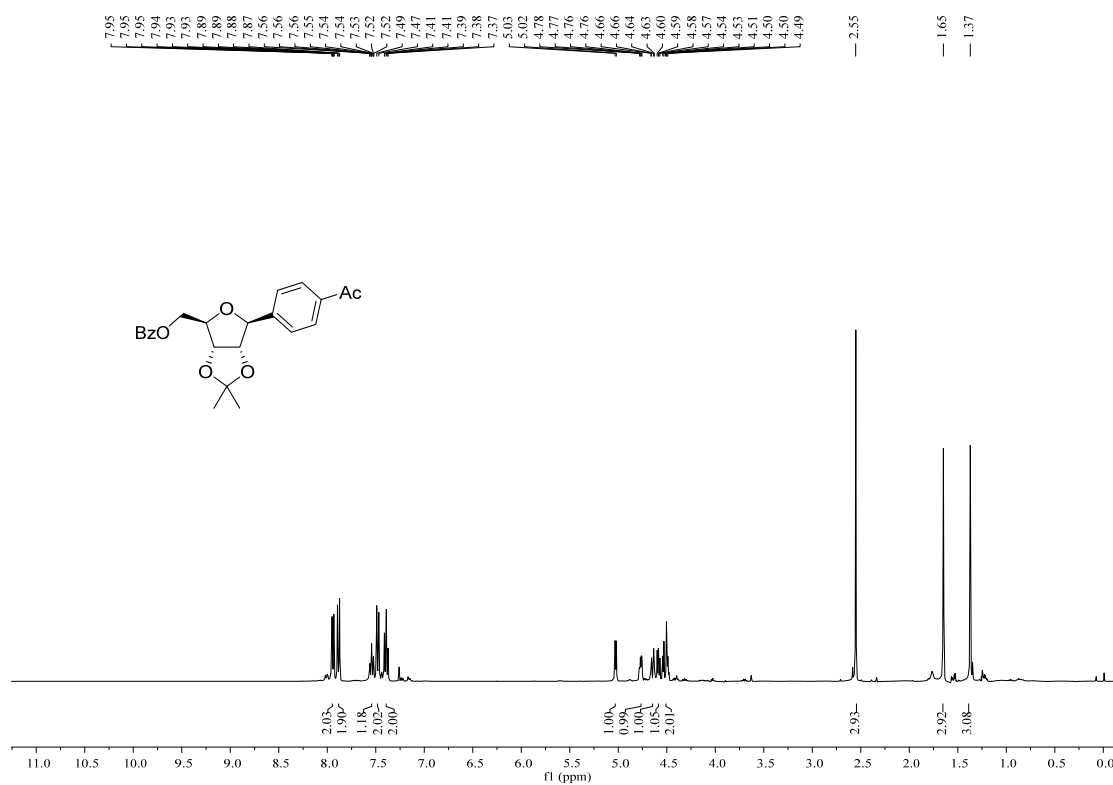

**<sup>13</sup>C NMR (100 MHz, CDCl<sub>3</sub>) of 31**

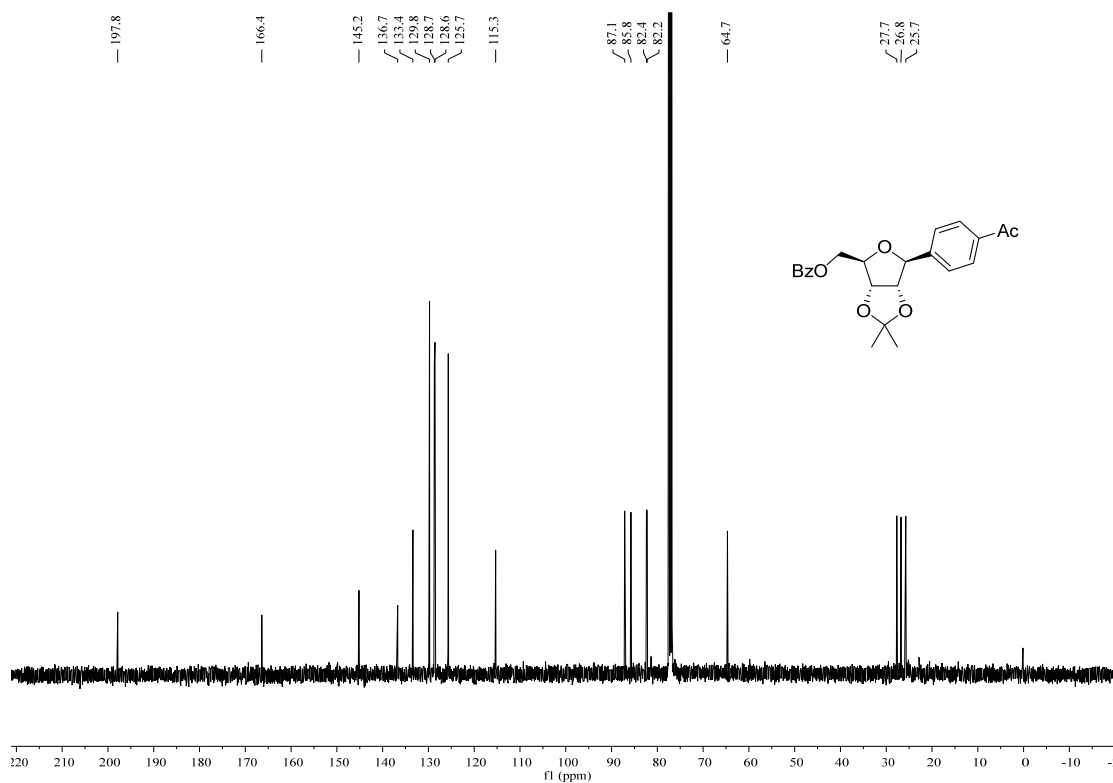

<sup>1</sup>H NMR (400 MHz, CDCl<sub>3</sub>) of **32**

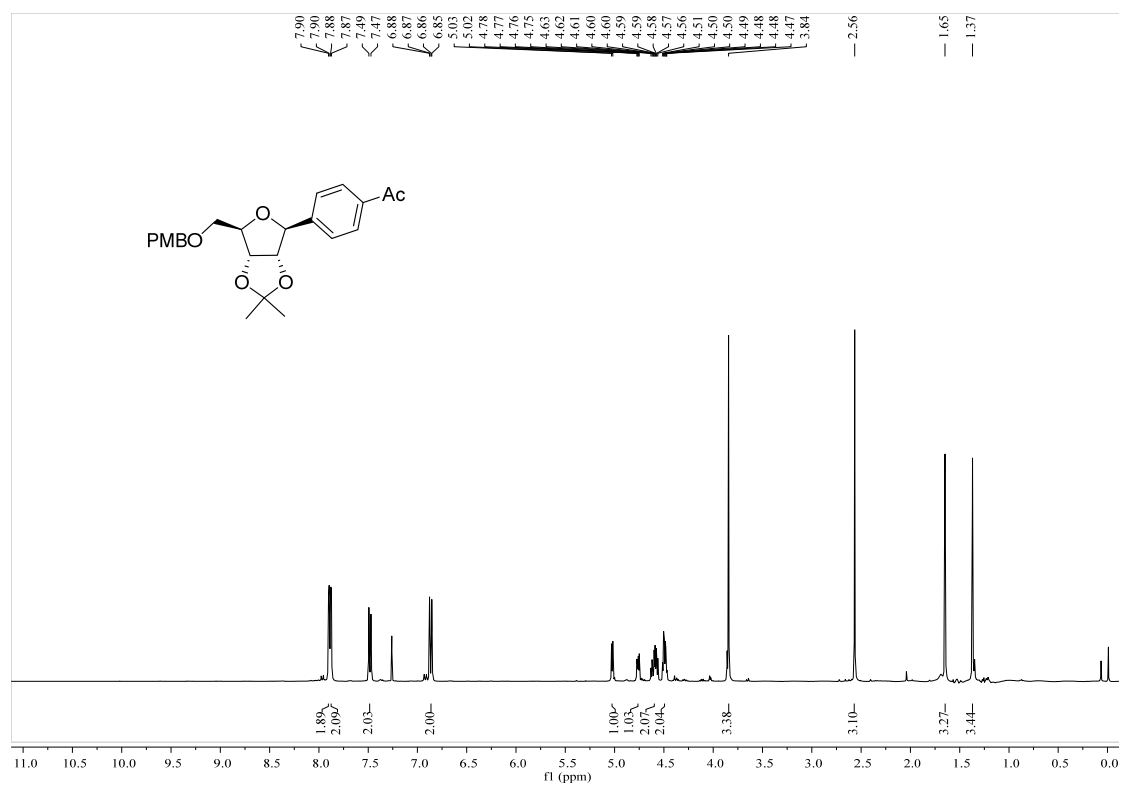

<sup>13</sup>C NMR (100 MHz, CDCl<sub>3</sub>) of **32**

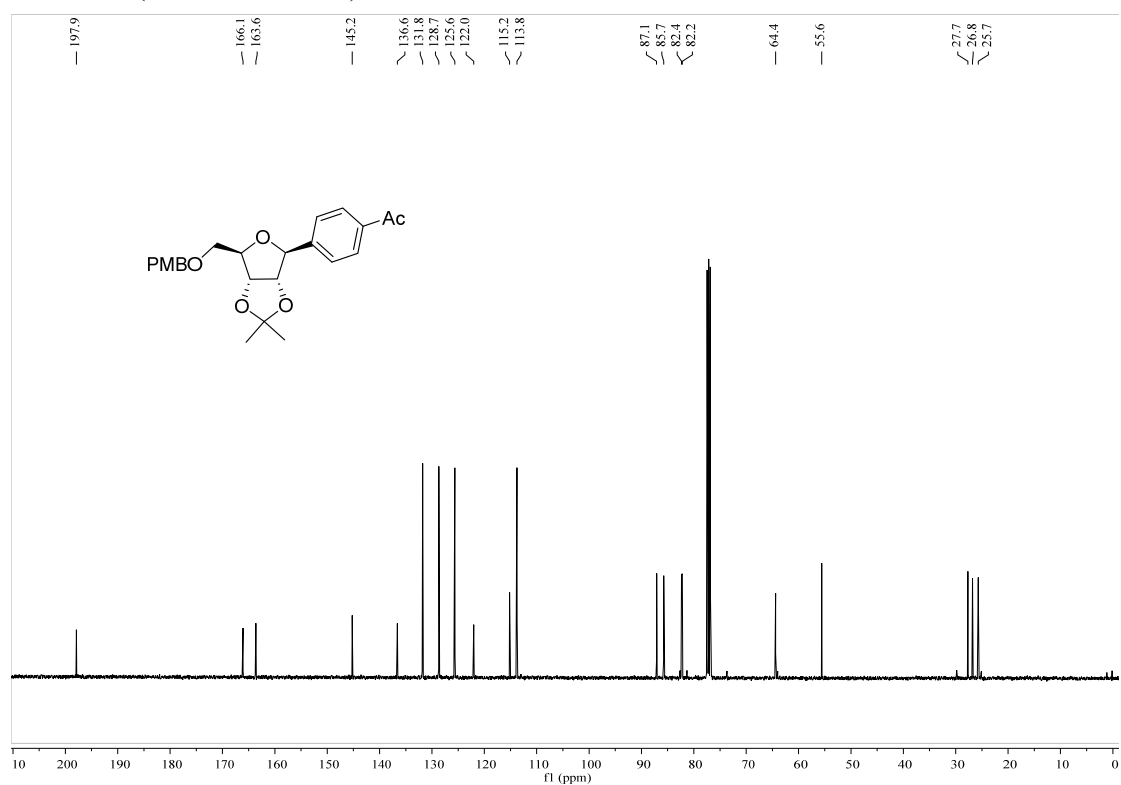

**<sup>1</sup>H NMR (400 MHz, CDCl<sub>3</sub>) of 33**

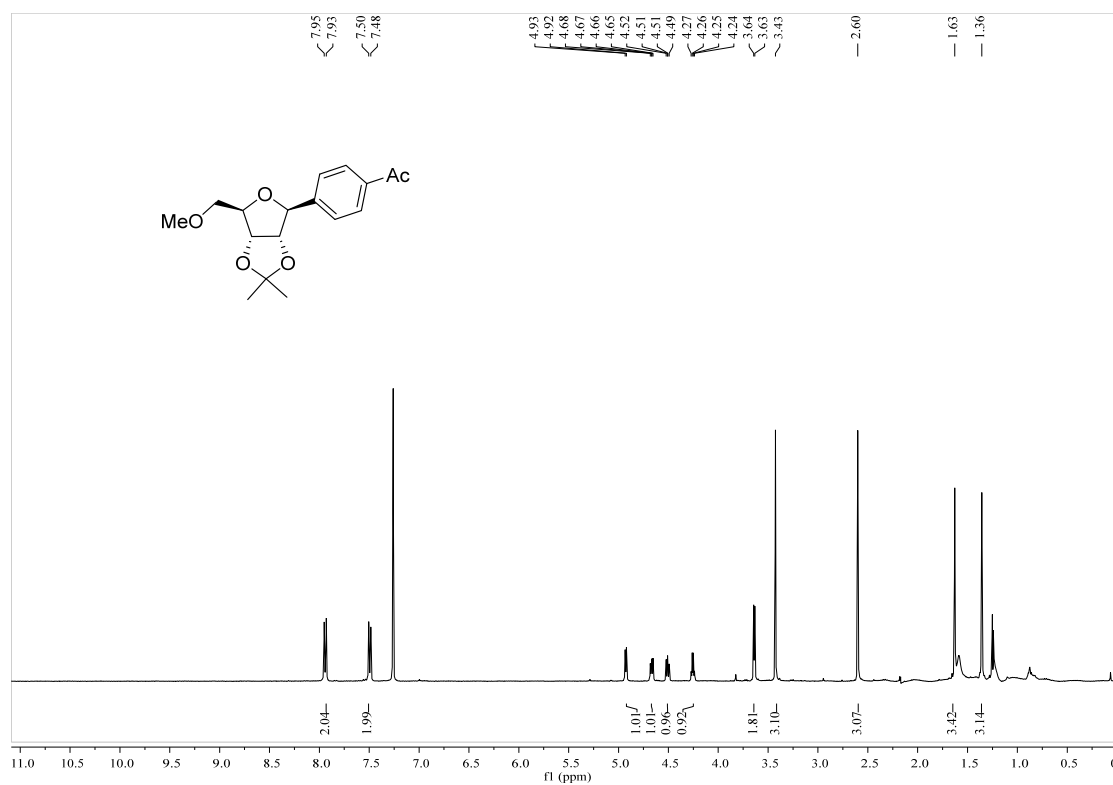

**<sup>13</sup>C NMR (100 MHz, CDCl<sub>3</sub>) of 33**

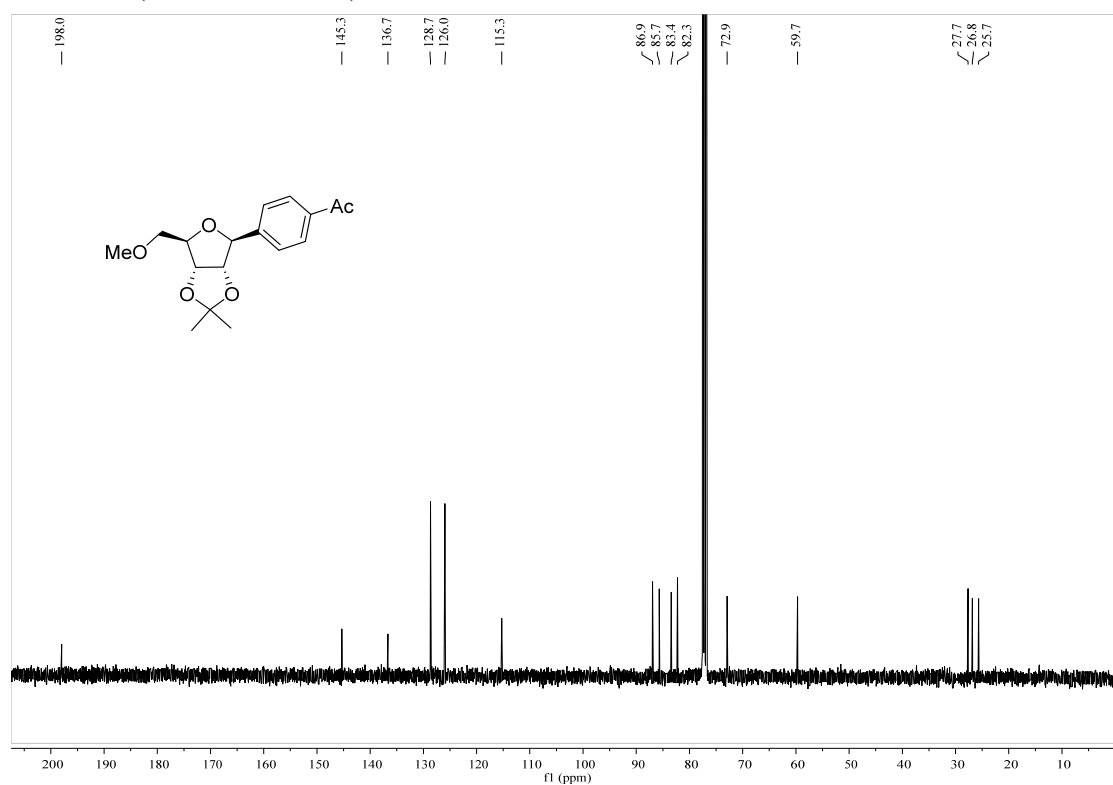

**$^1\text{H}$ - $^1\text{H}$  COSY (400 MHz,  $\text{CDCl}_3$ ) of 31**

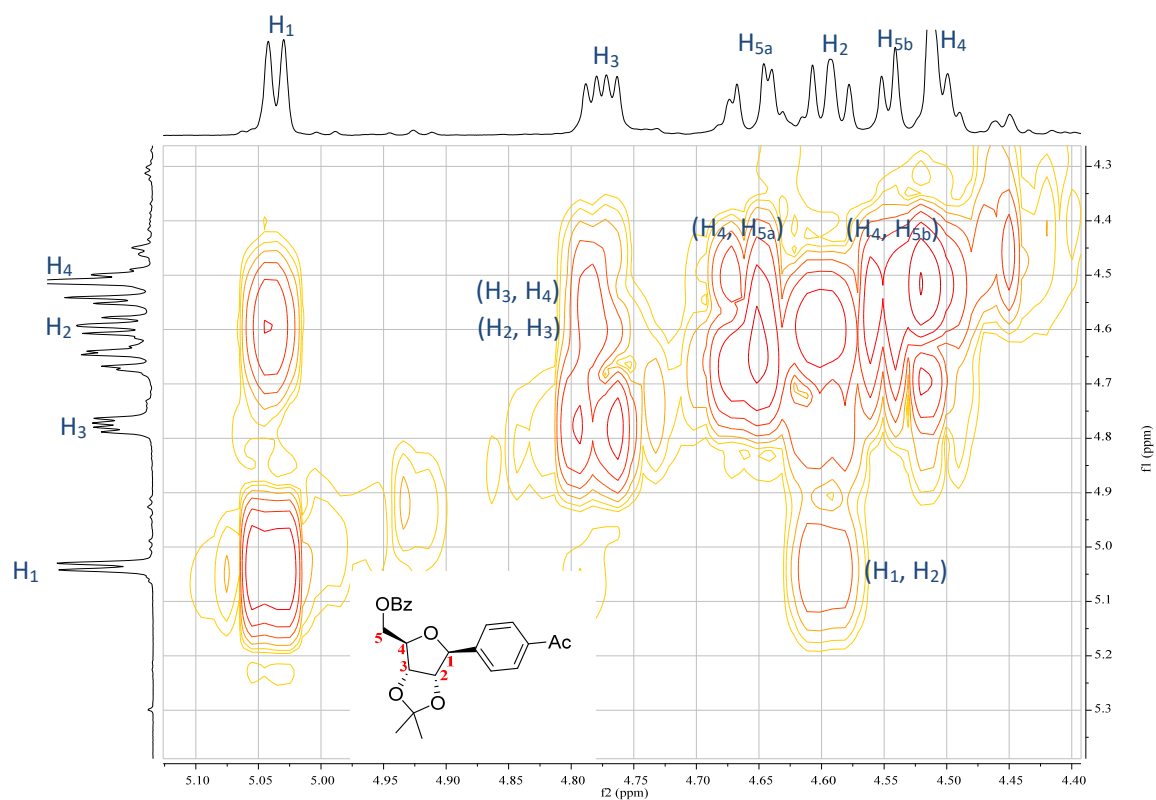

**$^{13}\text{C}$ - $^1\text{H}$  HSQC (400 MHz,  $\text{CDCl}_3$ ) of 31**

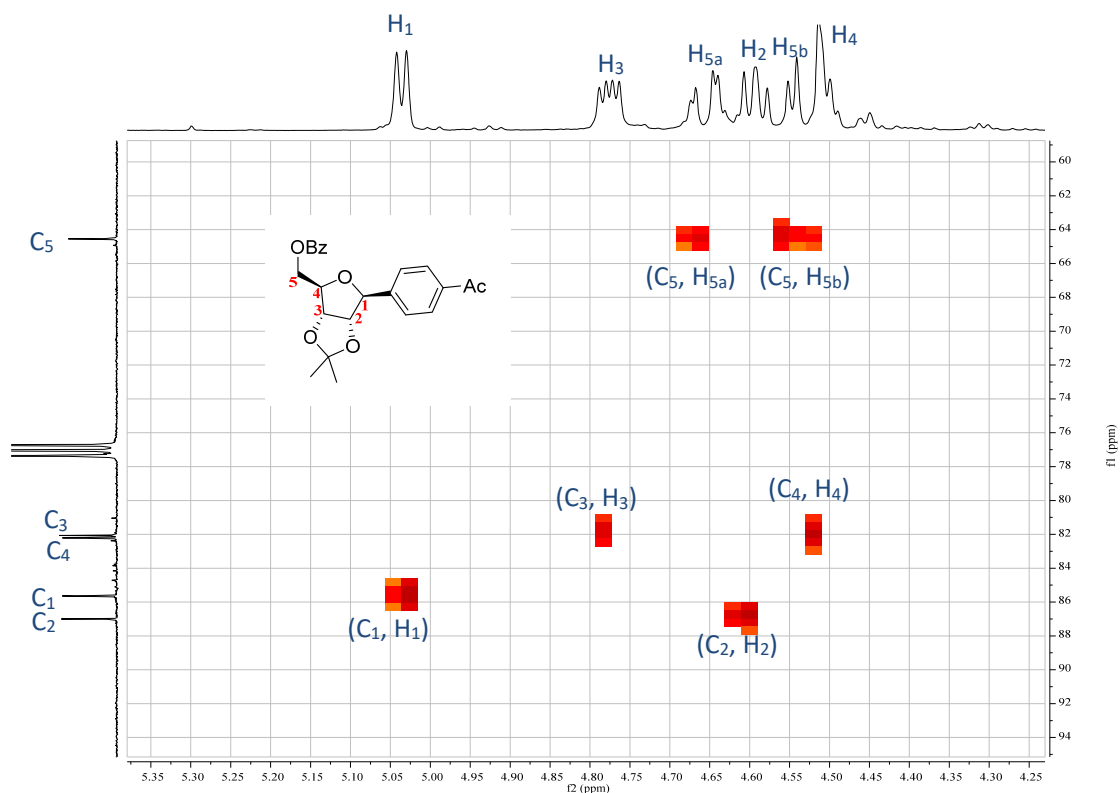

**$^1\text{H}$ - $^1\text{H}$  NOESY (400 MHz,  $\text{CDCl}_3$ ) of **31****

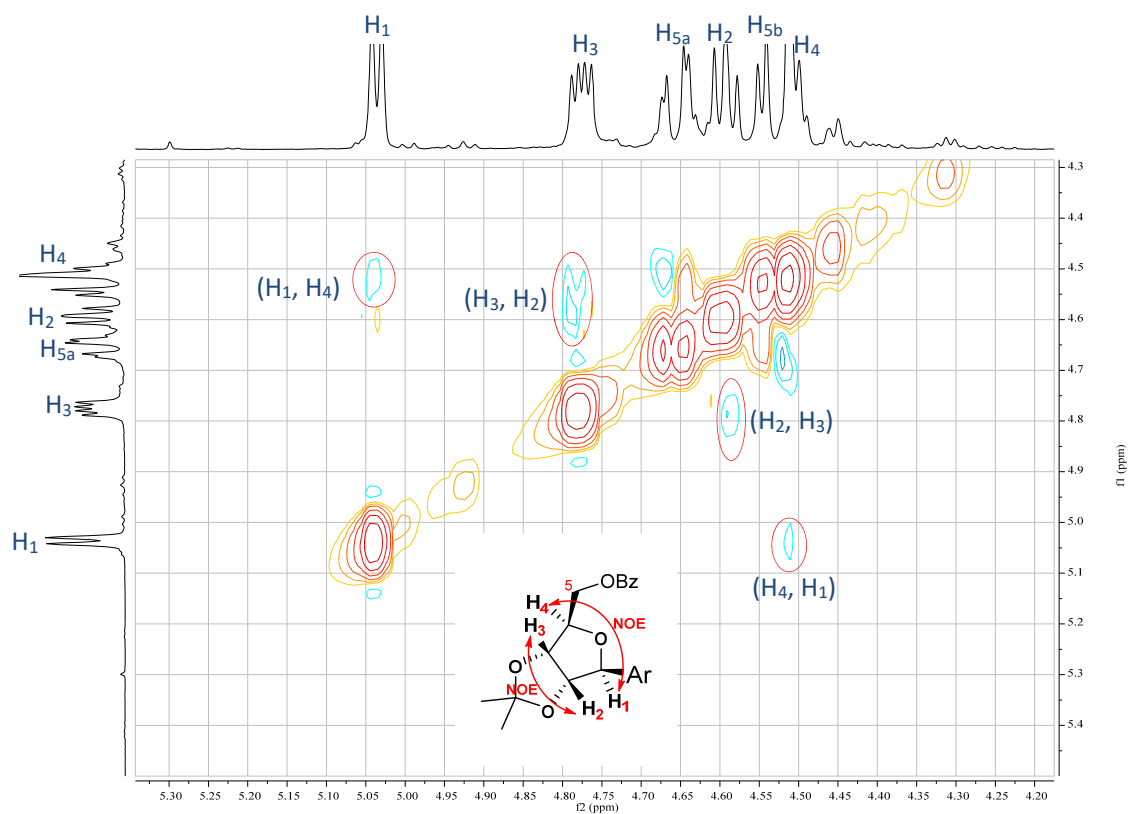

**$^1\text{H}$ - $^1\text{H}$  COSY (400 MHz,  $\text{CDCl}_3$ ) of **32****

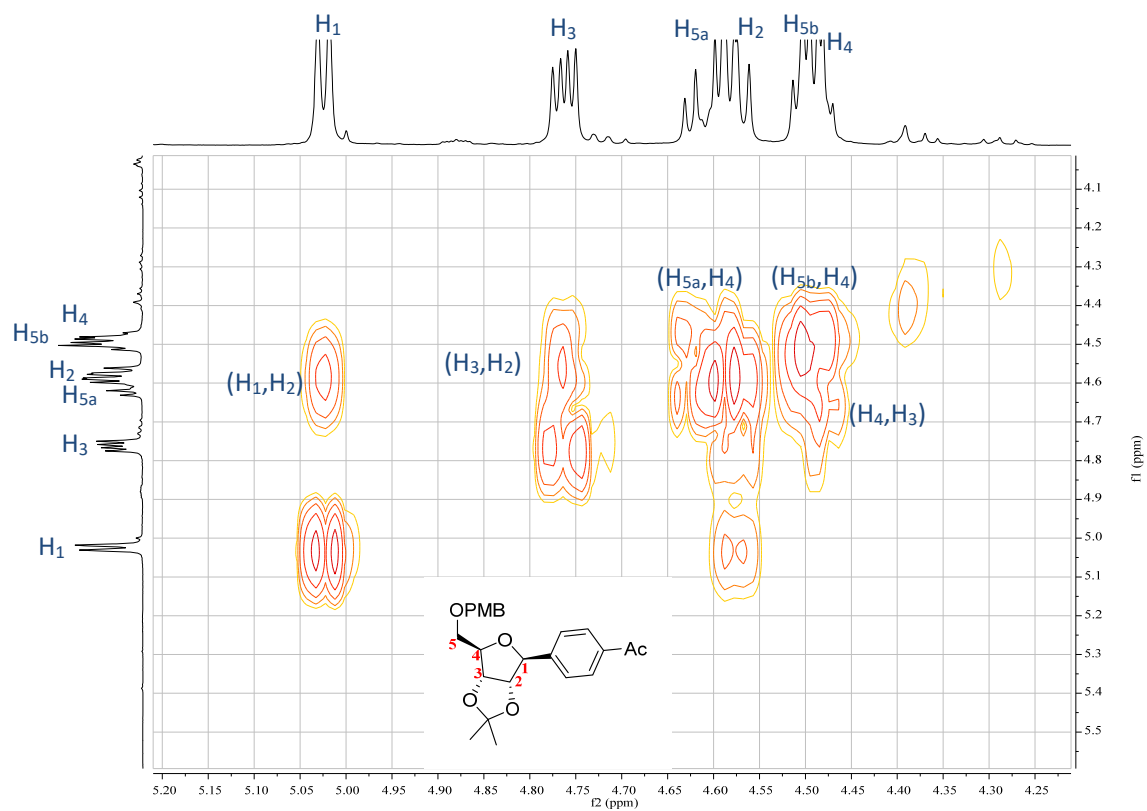



$^{13}\text{C}$ - $^1\text{H}$  HSQC (400 MHz,  $\text{CDCl}_3$ ) of **32**

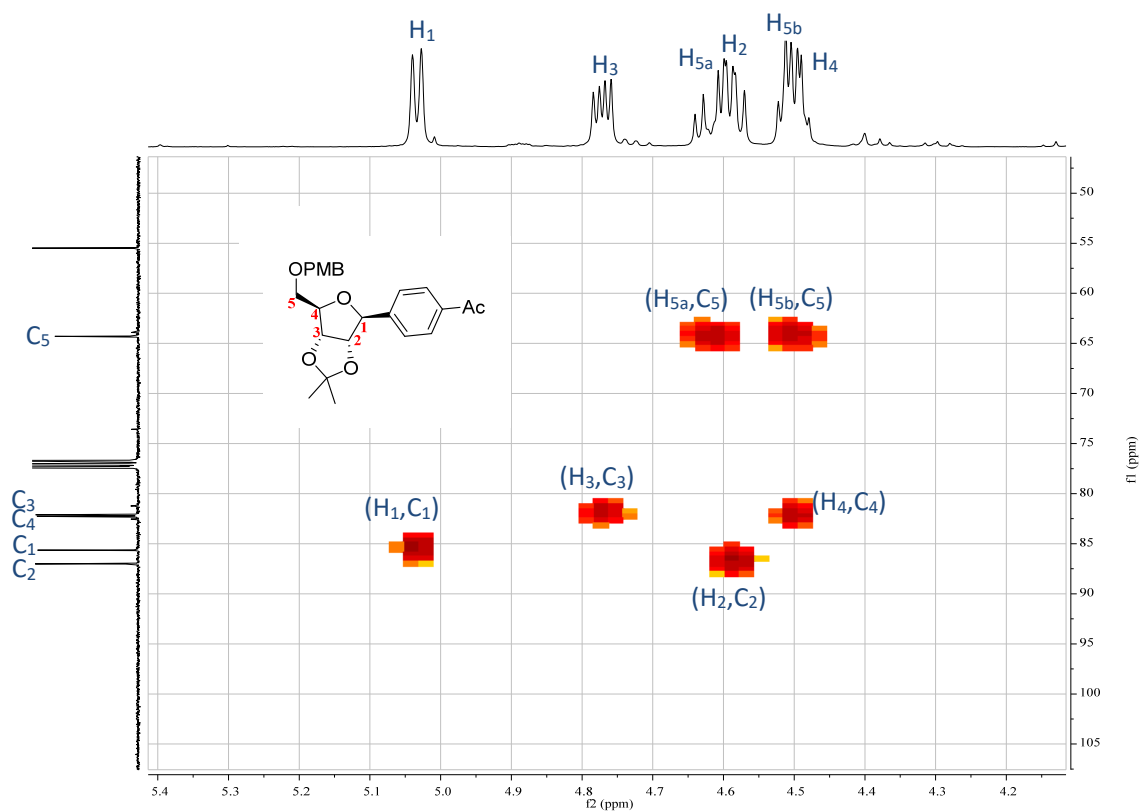

$^1\text{H}$ - $^1\text{H}$  NOESY (400 MHz,  $\text{CDCl}_3$ ) of **32**

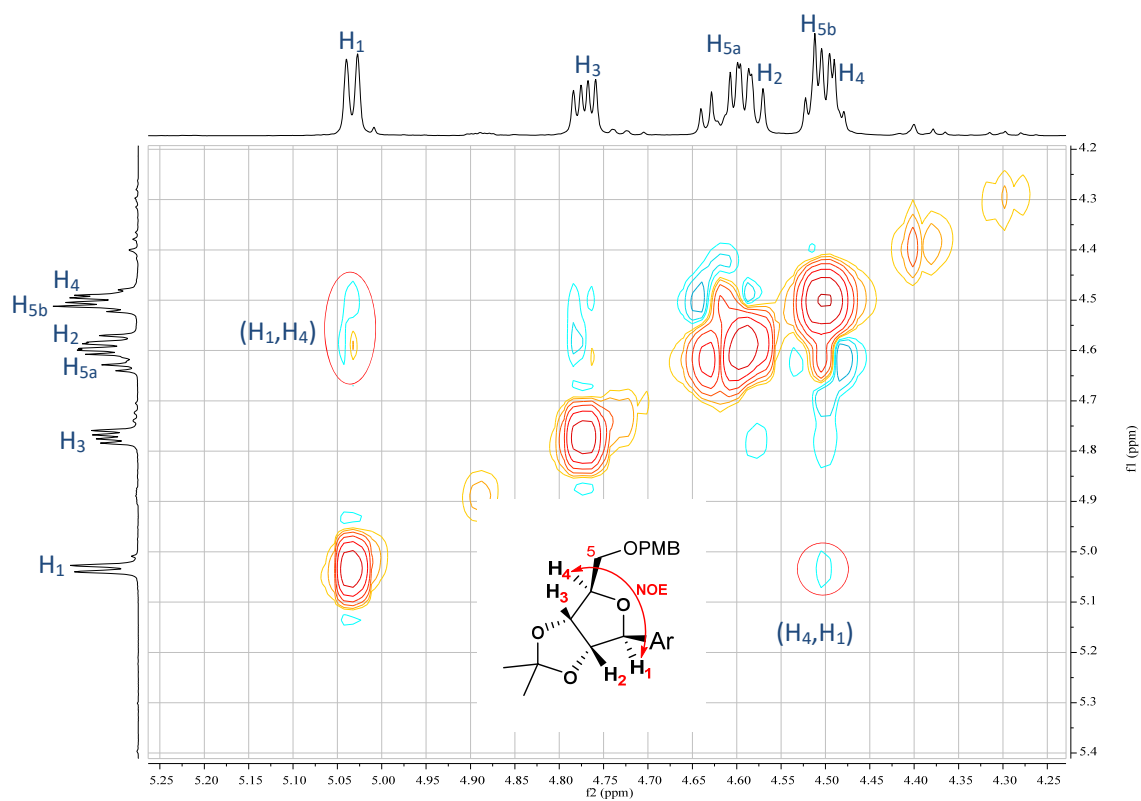

$^1\text{H}$ - $^1\text{H}$  COSY (400 MHz,  $\text{CDCl}_3$ ) of **33**

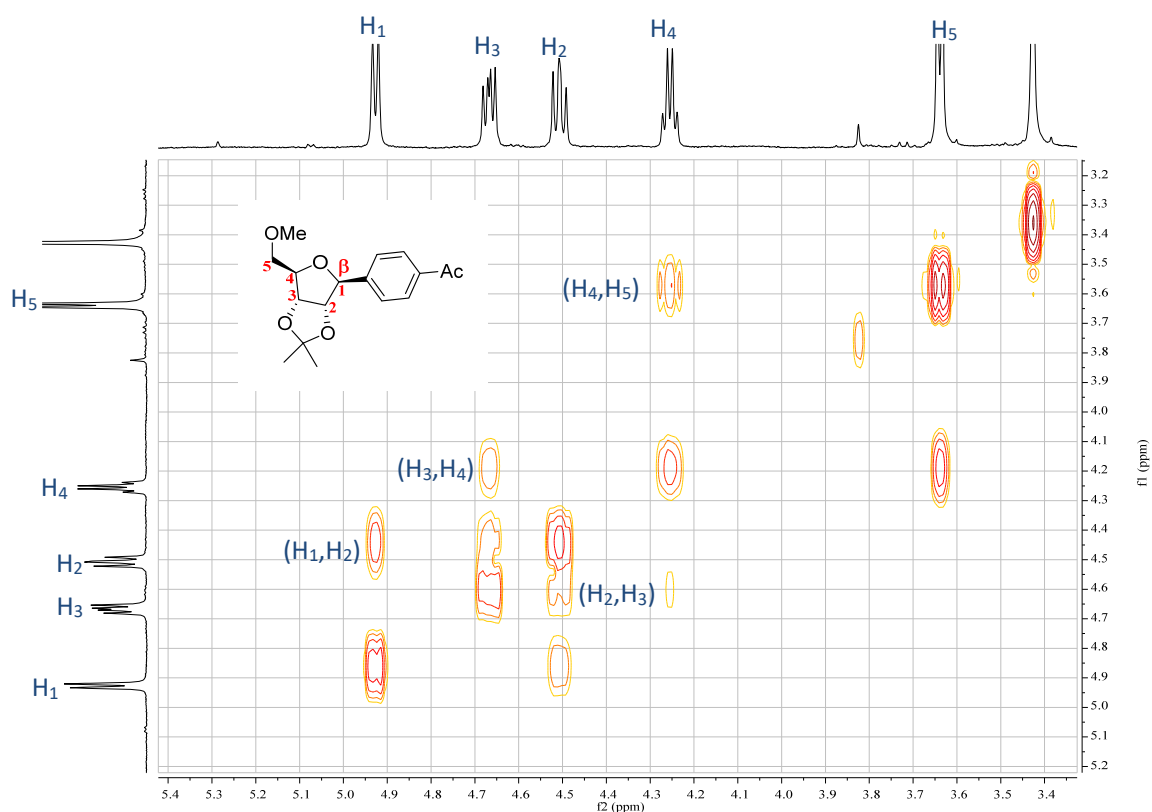

$^{13}\text{C}$ - $^1\text{H}$  HSQC (400 MHz,  $\text{CDCl}_3$ ) of **33**

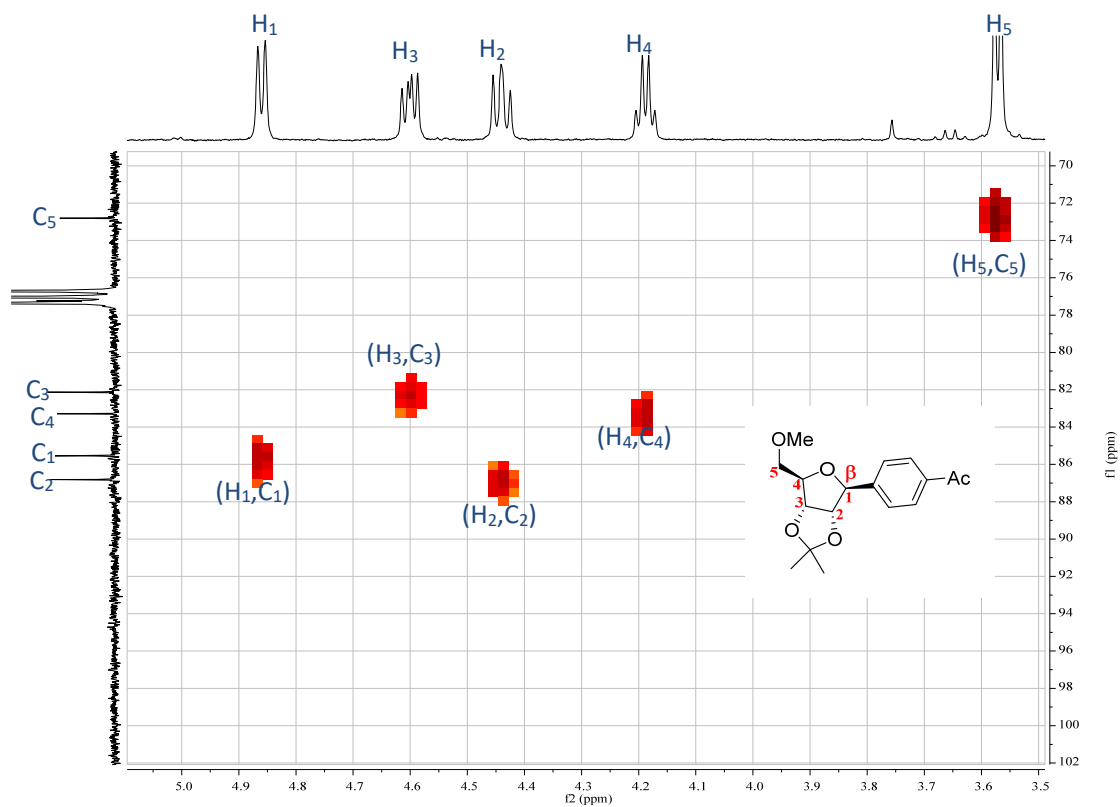

$^1\text{H}$ - $^1\text{H}$  NOESY (400 MHz,  $\text{CDCl}_3$ ) of **33**

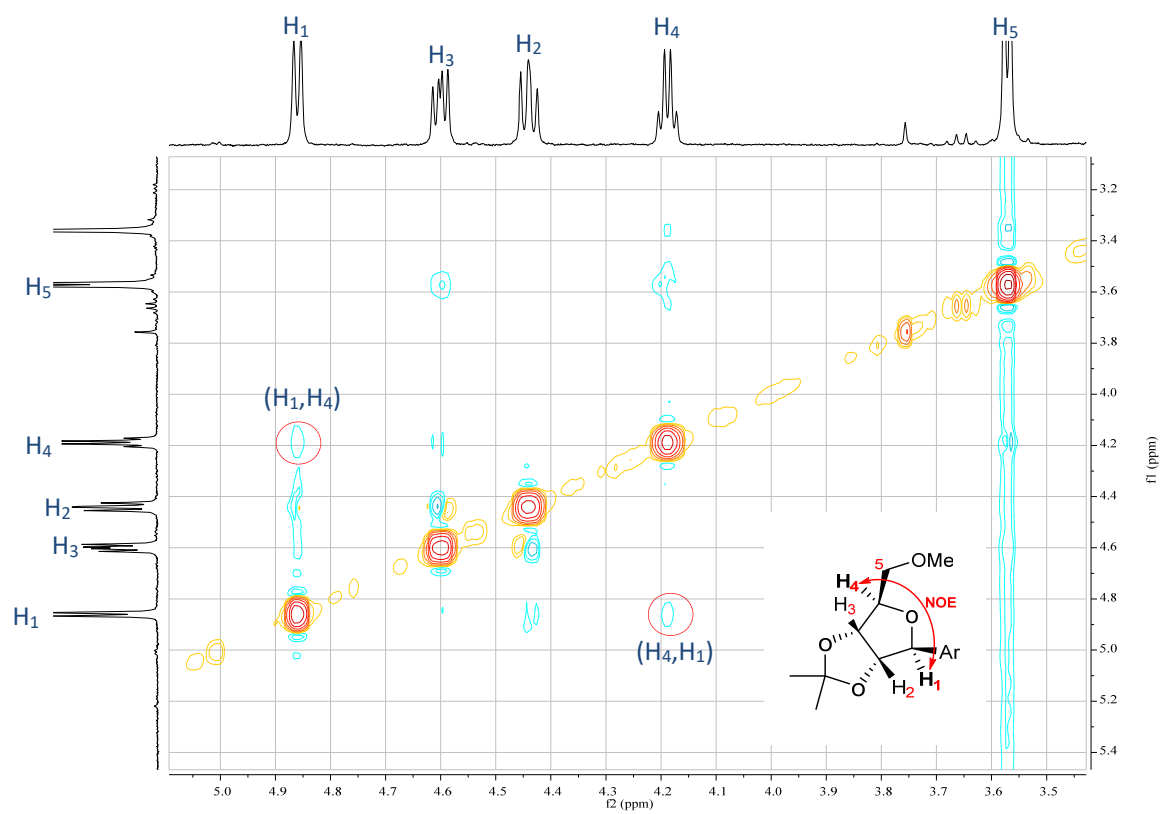

## The determination of the diastereomeric ratio

For **31** and **32**, we used the anomeric protons to determine the diastereomeric ratio. For compound **33**, we used the MeO to determine the diastereomeric ratio. The diastereomeric ratios determined are in the range of 3.5-4.8, consistent with the results reported by Messaoudi and co-workers in radical C-alkynyl glycosylation.<sup>1</sup>

The ratio of isomer mixture **31** ( $\alpha:\beta = 1:3.8$ )

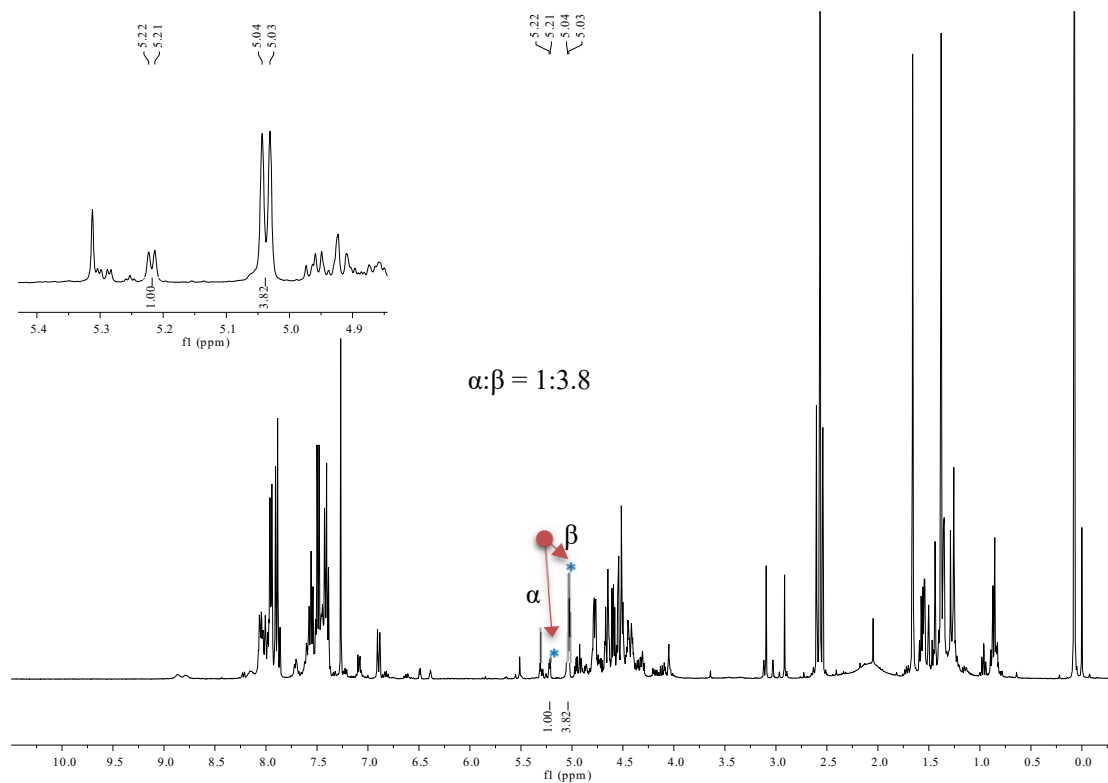

<sup>1</sup> M. Zhu and S. Messaoudi, *ACS Catalysis*, 2021, **11**, 6334–6342.

The ratio of isomer mixture **32** ( $\alpha:\beta = 1:4.8$ )

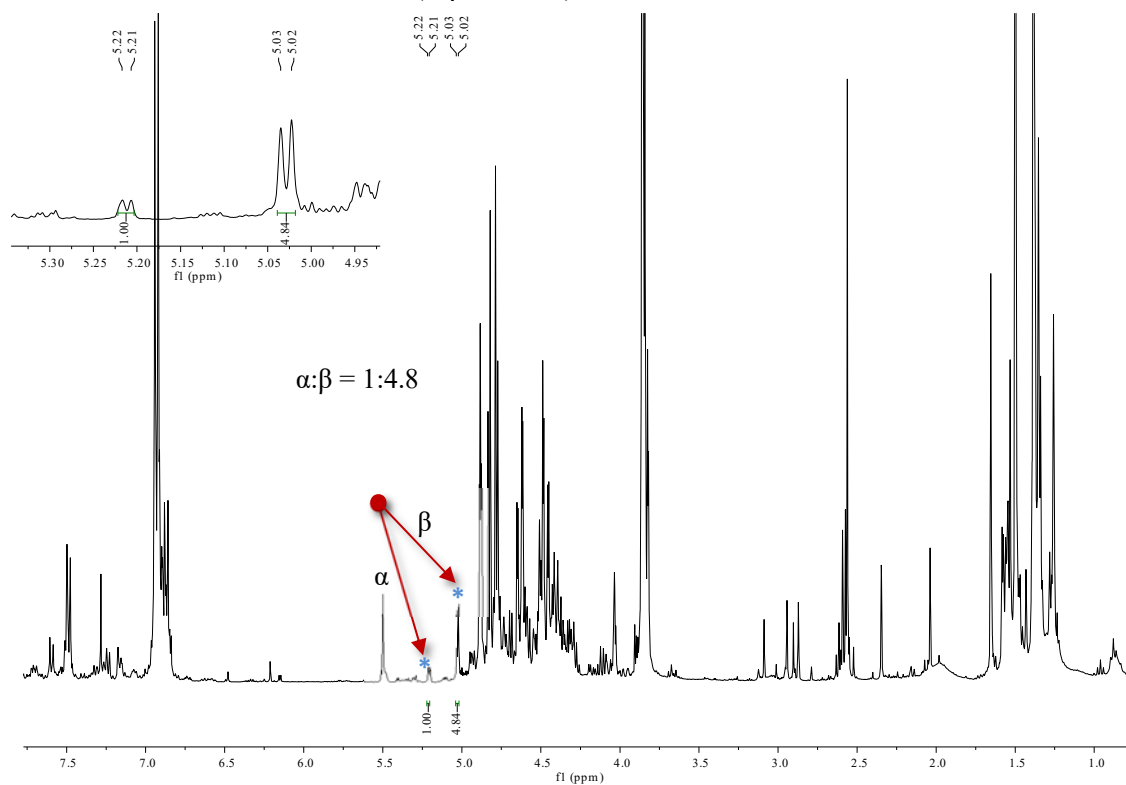

The ratio of isomer mixture **33** ( $\alpha:\beta = 1:3.5$ )

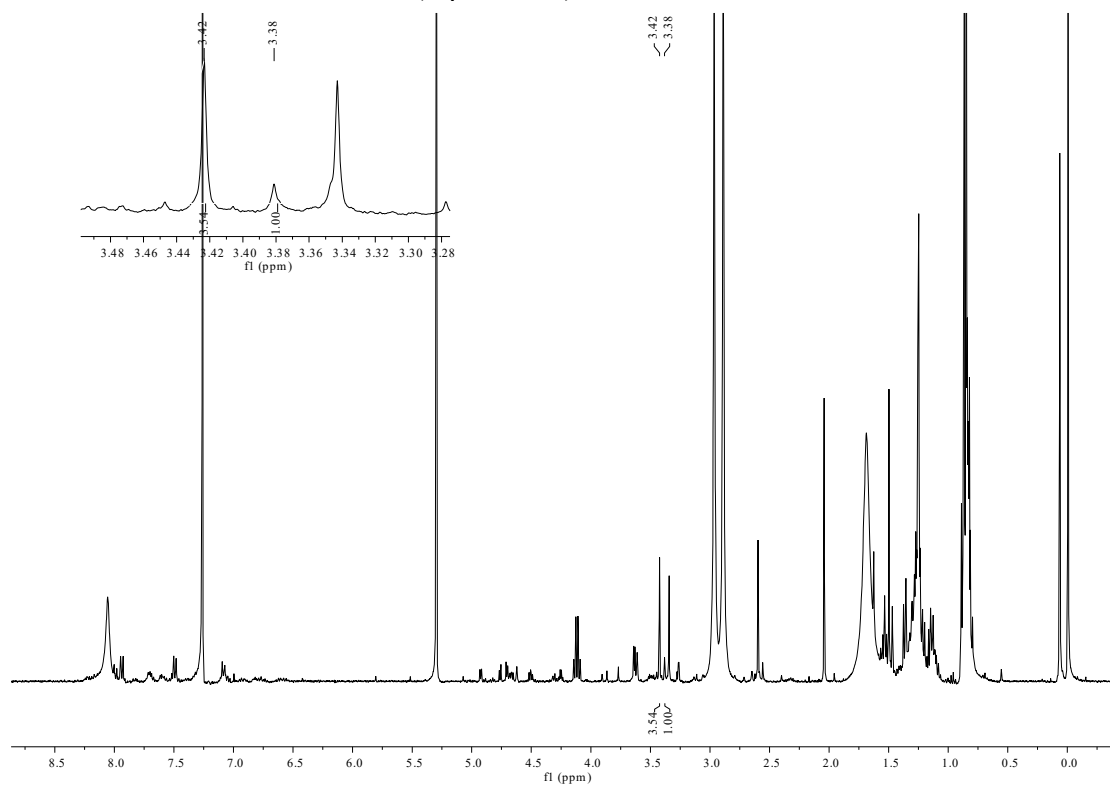

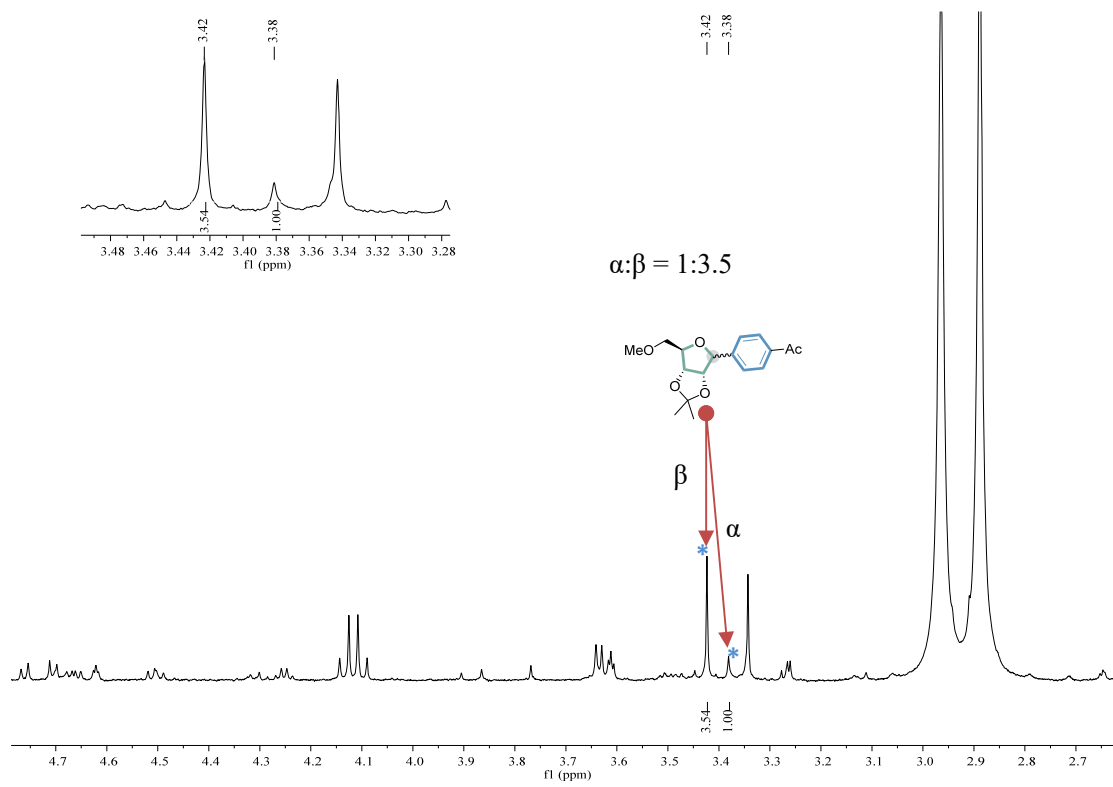

Supplement: d2ob00896c2.pdf [file d2ob00896c2.pdf]
