# Supplementary material for: Preparation of glycosyl carboxylic acidsviastereoselective synthesis and oxidative cleavage ofC-vinyl glycosides
Source: Royal Society of Chemistry journal article supplement (doi:10.1039/d2ob00896c), 2022-01-01
Supplement: d2ob00896c1.pdf [file d2ob00896c1.pdf]

Compound Check List

| No.   | Compound structure | Known | Unknown | NMR ( <sup>1</sup> H, <sup>13</sup> C) | HRMS (ESI) |
|-------|--------------------|-------|---------|----------------------------------------|------------|
| 2a    |                    | √     |         | √                                      | √          |
| 2b=15 |                    | √     |         | √                                      | √          |
| 4d    |                    |       | √       | √                                      | √          |
| 4e    |                    |       | √       | √                                      | √          |
| 4f    |                    |       | √       | √                                      | √          |
| 4g    |                    | √     |         | √                                      | √          |
| 4i    |                    |       | √       | √                                      | √          |
| 4j    |                    |       | √       | √                                      | √          |
| 4h    |                    |       | √       | √                                      | √          |
| 4k    |                    |       | √       | √                                      | √          |
| 5a    |                    | √     |         | √                                      | √          |
| 5b    |                    |       | √       | √                                      | √          |

**Compound Check List**

|    |                                                                                     |   |   |   |   |
|----|-------------------------------------------------------------------------------------|---|---|---|---|
| 5c | 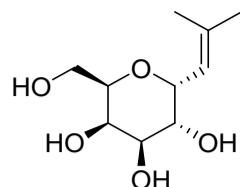   |   | √ | √ | √ |
| 7a |    | √ |   | √ | √ |
| 7b |    |   | √ | √ | √ |
| 7c |    |   | √ | √ | √ |
| 7d |   |   | √ | √ | √ |
| 7e |  |   | √ | √ | √ |
| 7f |  |   | √ | √ | √ |
| 7g |  |   | √ | √ | √ |
| 7h |  | √ |   | √ | √ |
| 7i |  | √ |   | √ | √ |
| 9  |  |   | √ | √ | √ |
| 10 |  | √ |   | √ | √ |
| 11 |  |   | √ | √ | √ |
| 12 |  |   | √ | √ | √ |
| 13 |  |   | √ | √ | √ |

**Compound Check List**

|    |                                                                                     |   |   |   |   |
|----|-------------------------------------------------------------------------------------|---|---|---|---|
| 14 | 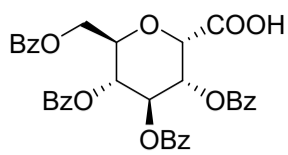   | √ |   | √ | √ |
| 15 |    | √ |   | √ | √ |
| 16 |    | √ |   | √ | √ |
| 17 |    | √ |   | √ | √ |
| 18 |    | √ |   | √ | √ |
| 19 |  | √ |   | √ | √ |
| 20 |  | √ |   | √ | √ |
| 21 |  |   | √ | √ | √ |
| 22 |  |   | √ | √ | √ |
| 23 |  |   | √ | √ | √ |
| 24 |  |   | √ | √ | √ |
| 25 |  | √ |   | √ | √ |
| 26 |  | √ |   | √ | √ |
| 27 |  |   | √ | √ | √ |
| 28 |  |   | √ | √ | √ |
| 29 |  | √ |   | √ | √ |

Compound Check List

|    |                                                                                   |   |   |   |   |
|----|-----------------------------------------------------------------------------------|---|---|---|---|
| 31 | 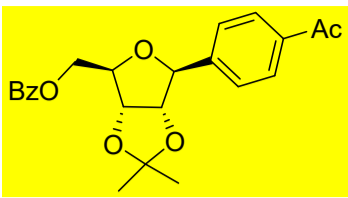 | √ |   | √ | √ |
| 32 |  |   | √ | √ | √ |
| 33 |  |   | √ | √ | √ |
